# Supplementary material for: Korean Society of Nephrology 2021 Clinical Practice Guideline for Optimal Hemodialysis Treatment
Source: PubMed Central journal article supplement — Kidney Res Clin Pract. 2021 Dec 10;40(Suppl 1):S1–S37. doi: 10.23876/j.krcp.21.600 (PMC8694695; doi:10.23876/j.krcp.21.600), 2021-12-10

## Supplement 5| Study Selection Flow Diagrams

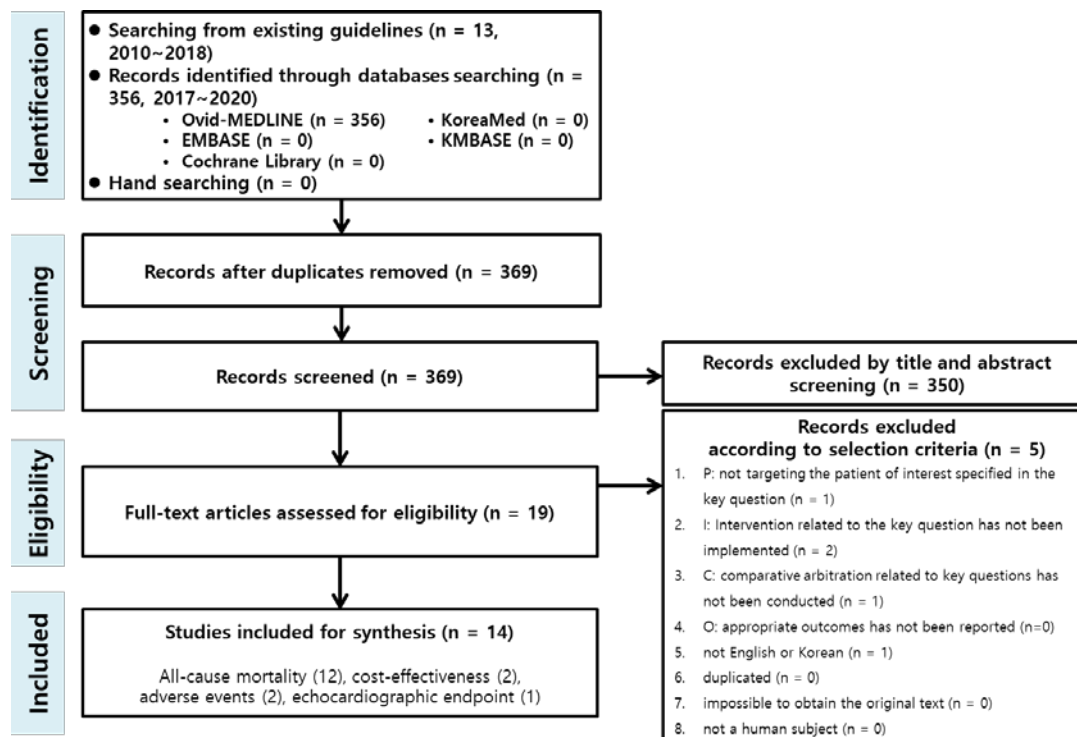

### Key question 1.1.

## Key question 1.2.

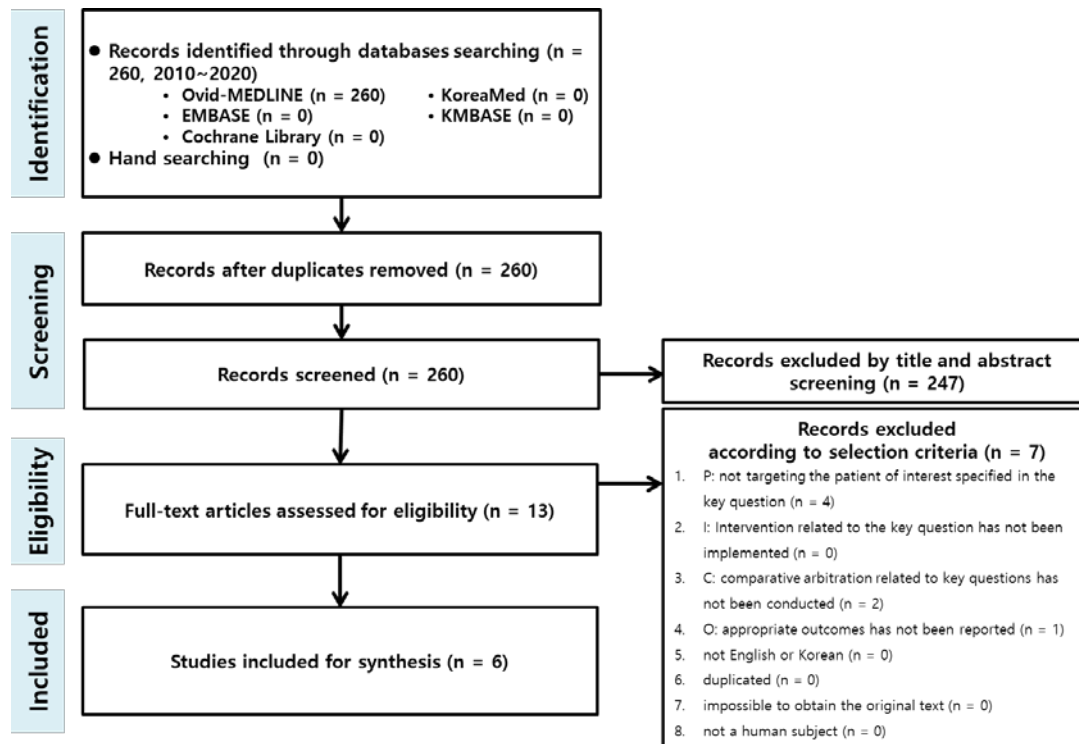

## Key question 2.1.

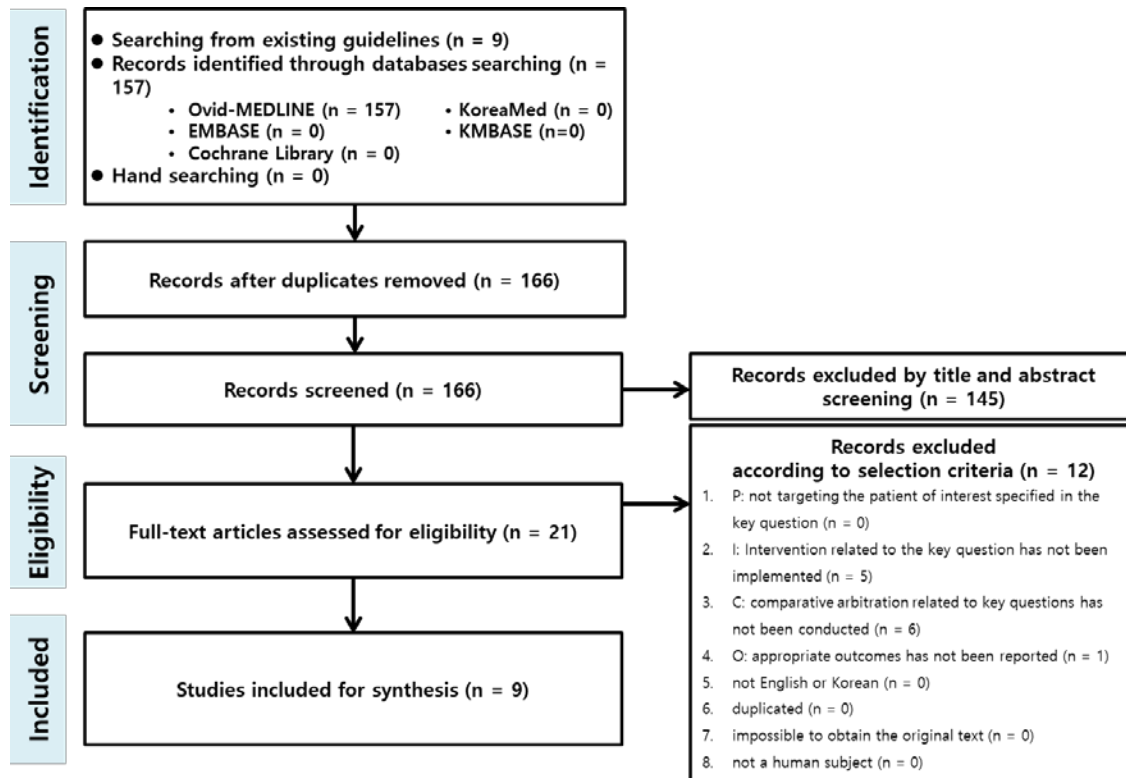

## Key question 2.2.

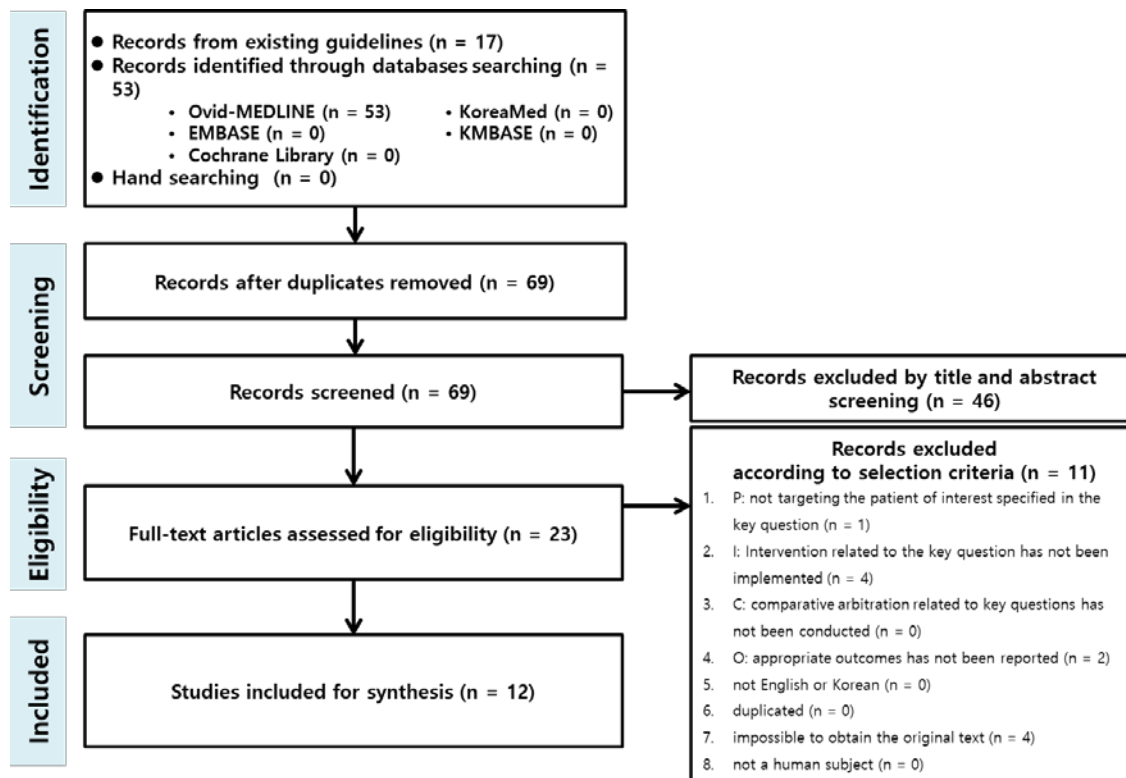

### Key question 3.1.

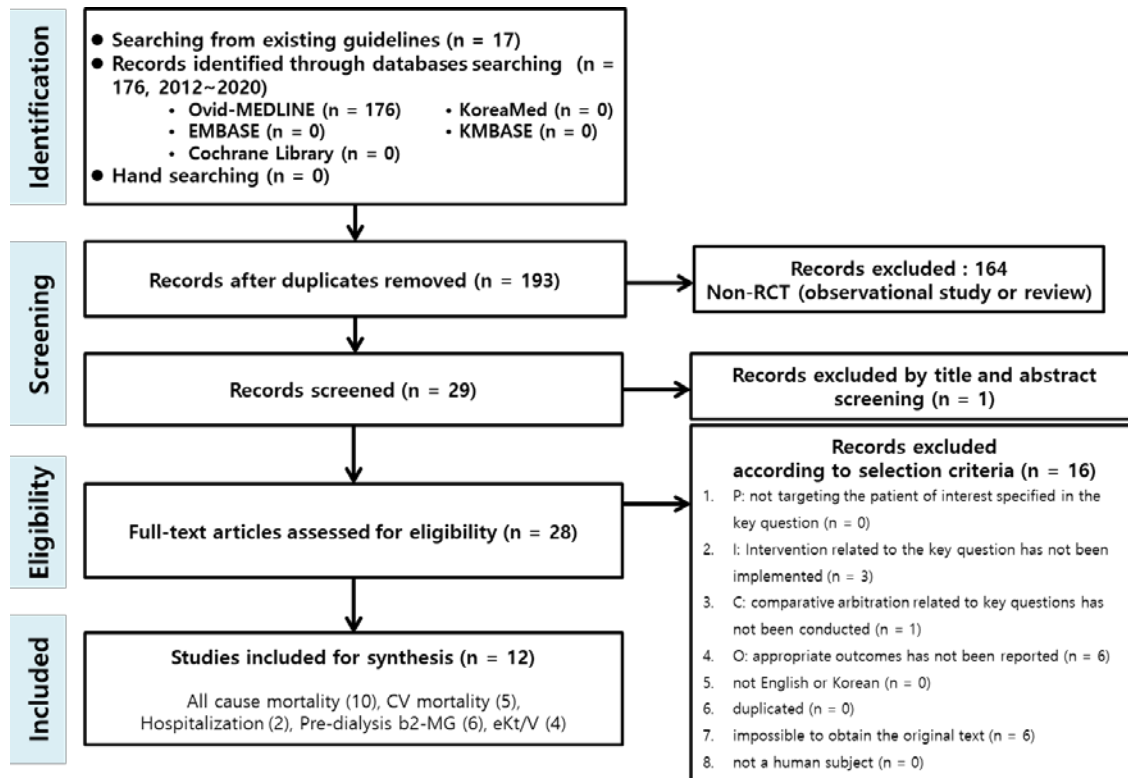

### Key question 3.2.

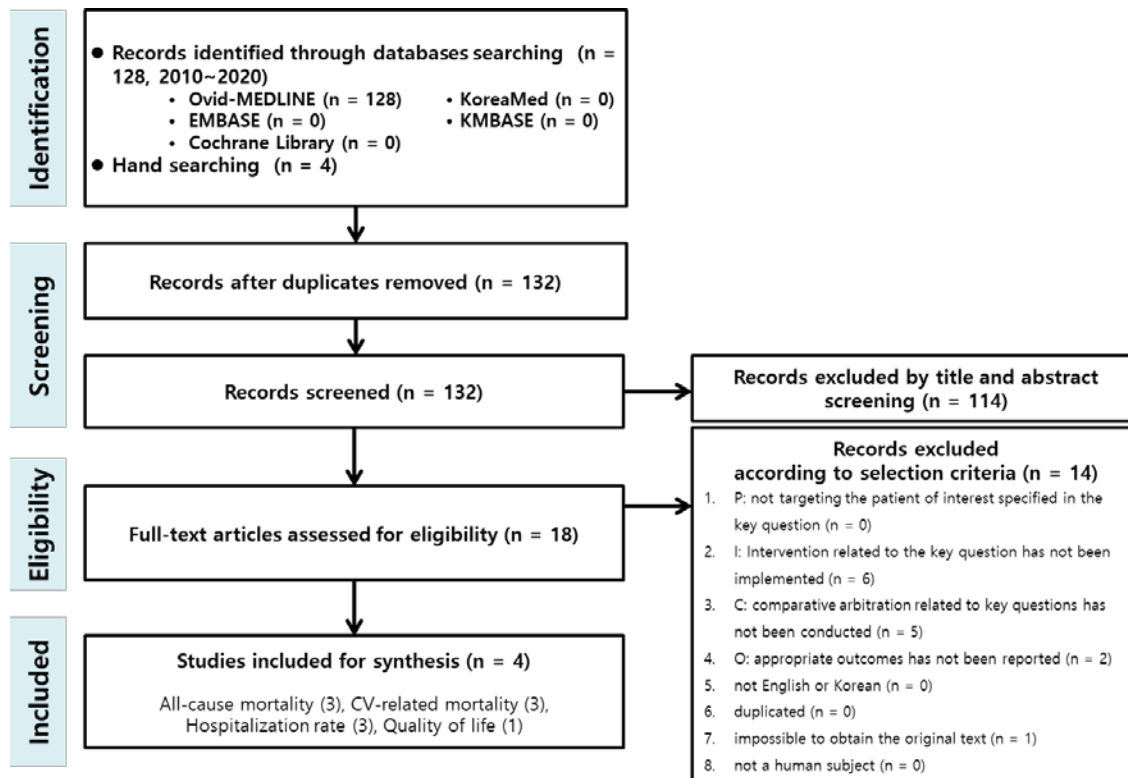

## Key question 4.1.

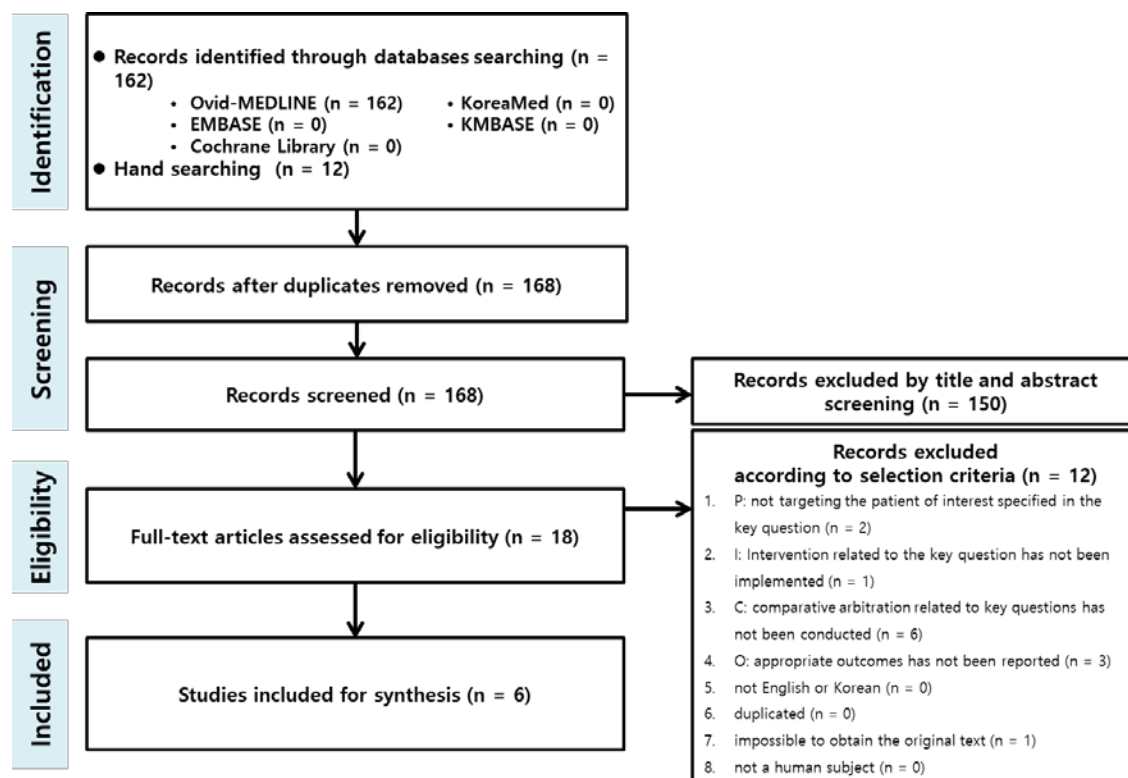

## Key question 4.2.

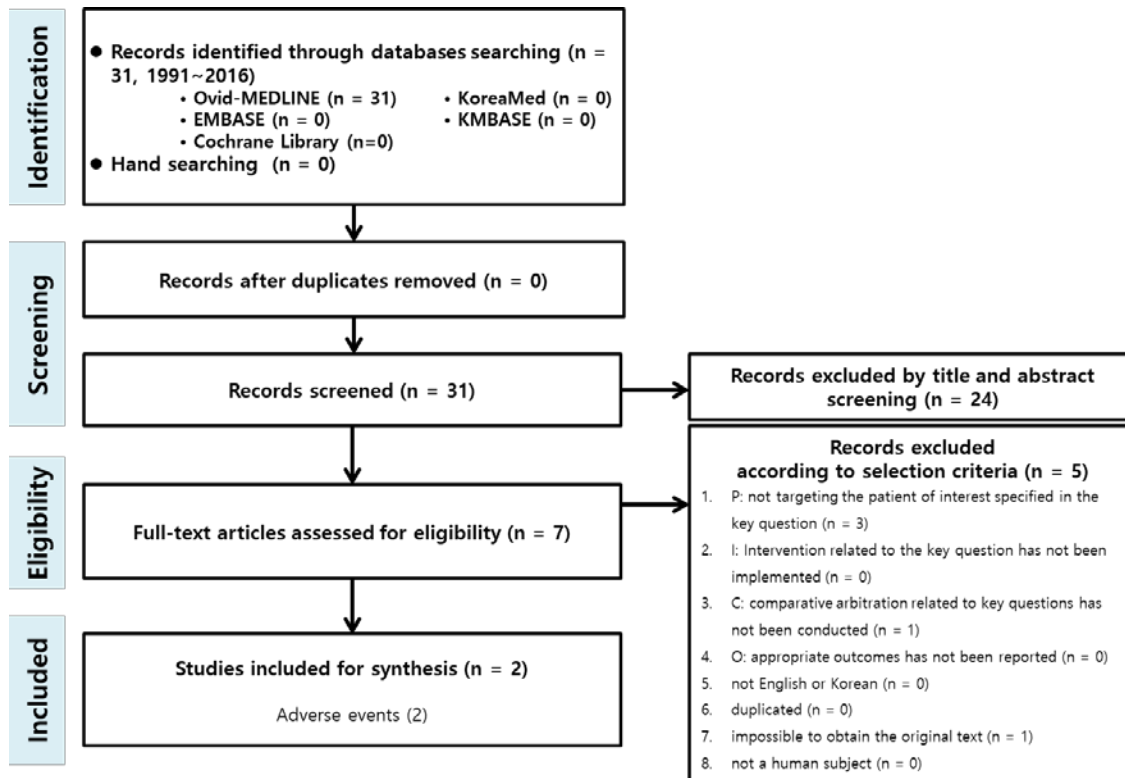

### Key question 5.1.

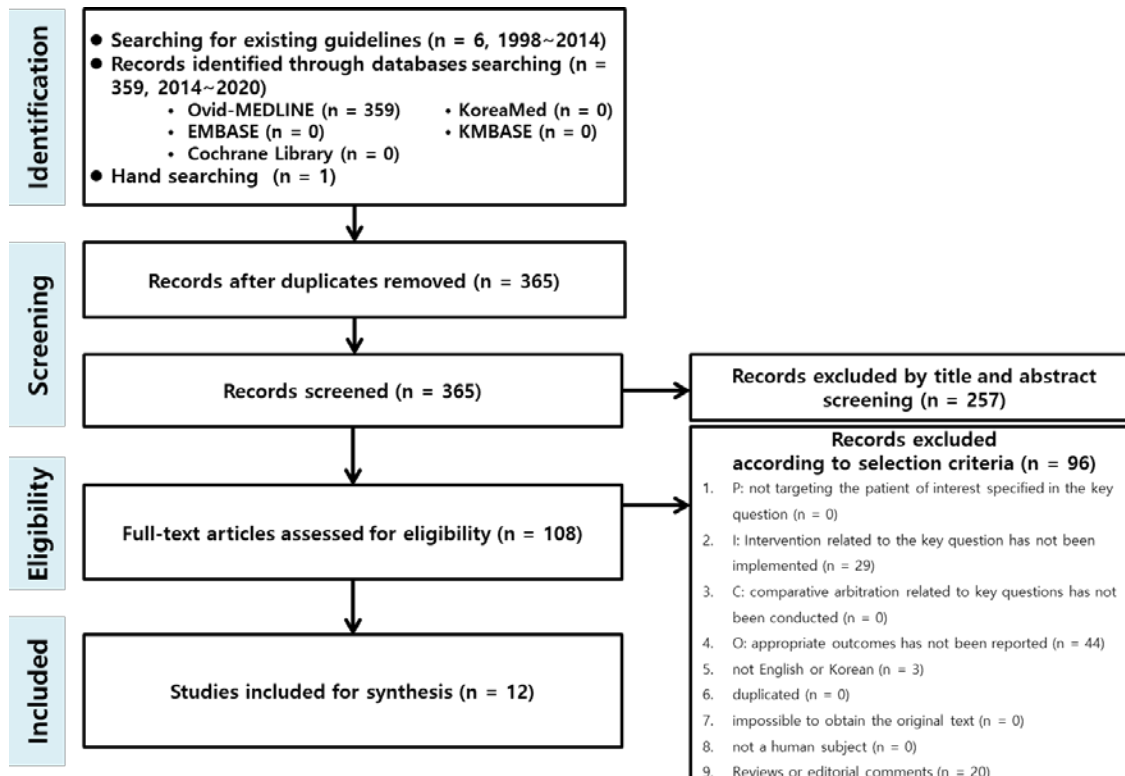

## Key question 5.2.

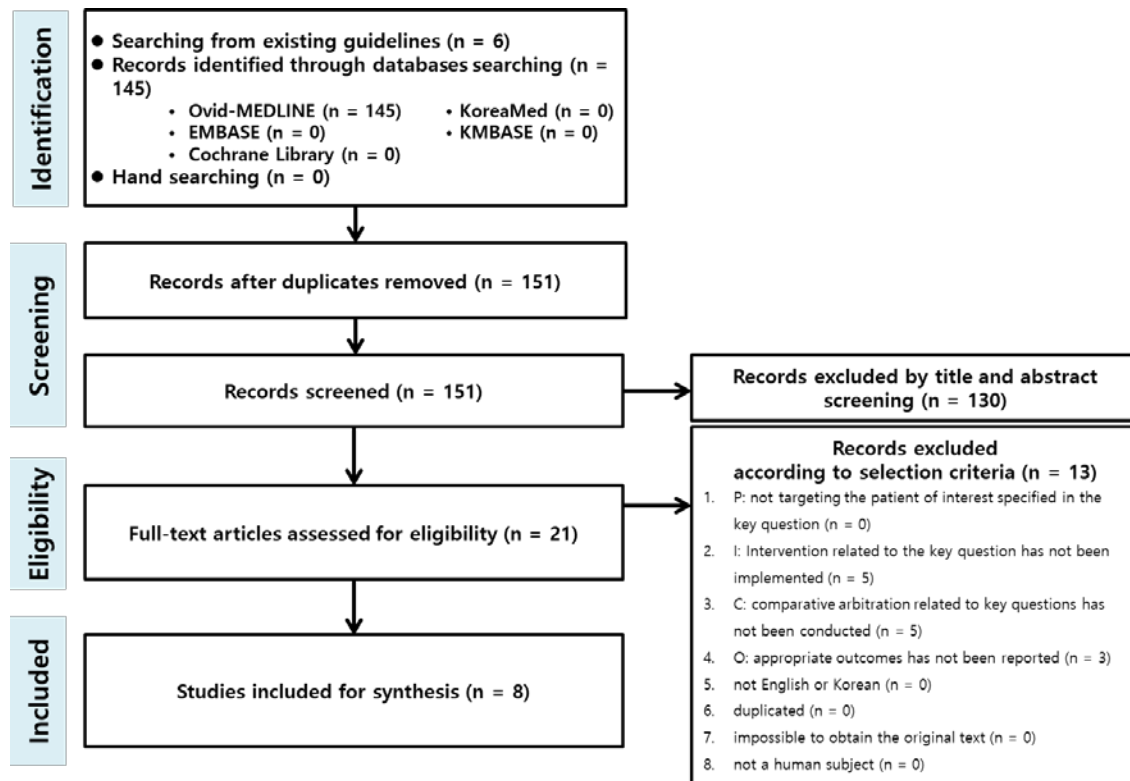

## Key question 6.1.

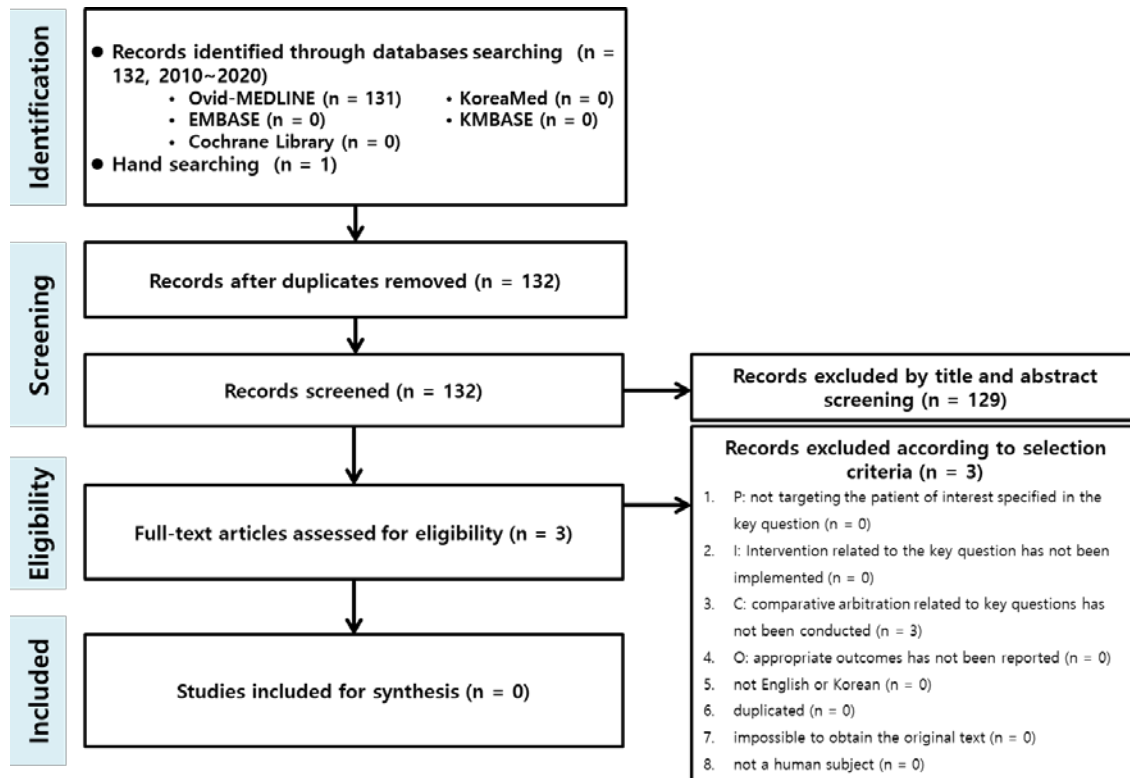

## Key question 6.2.

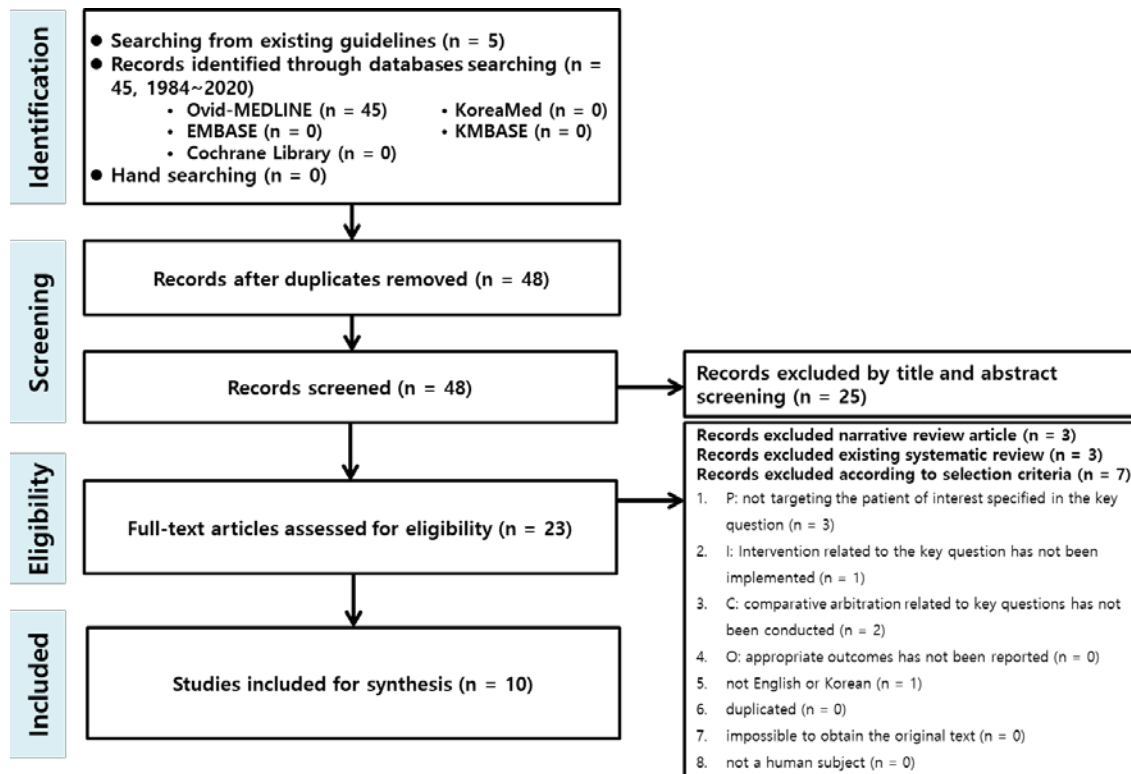

## Key question 7.1.

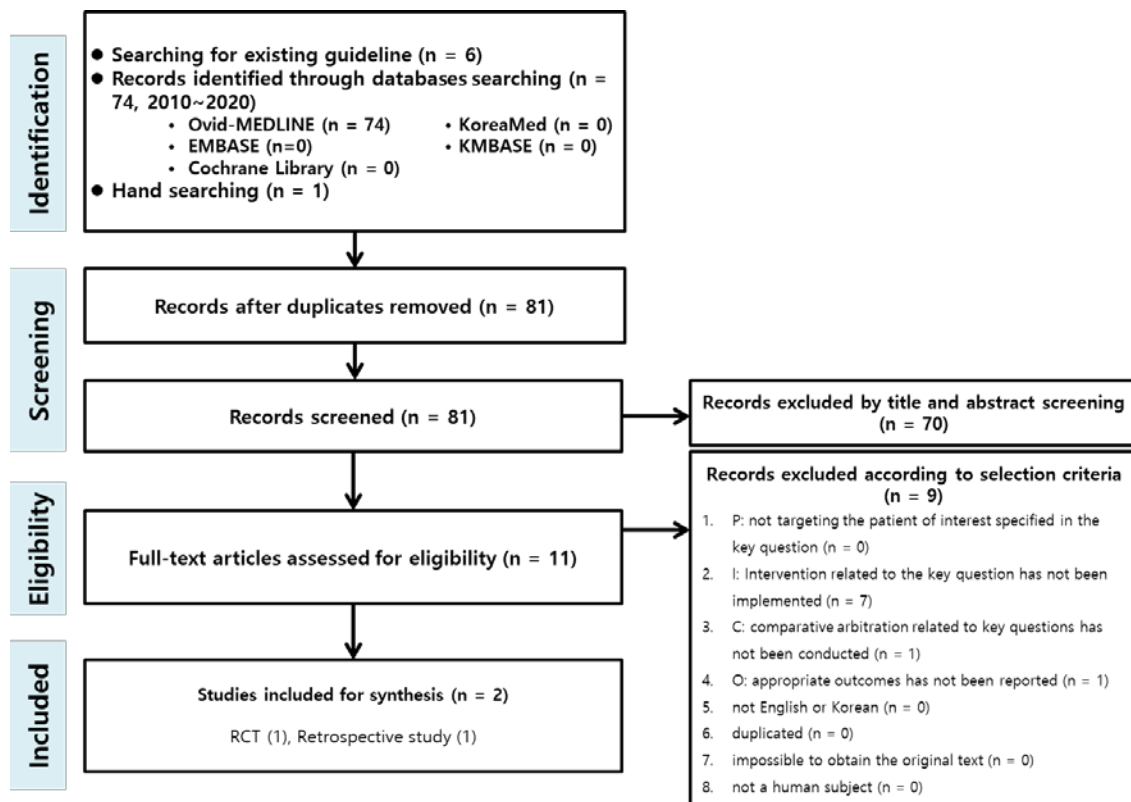



## Key question 8.1.

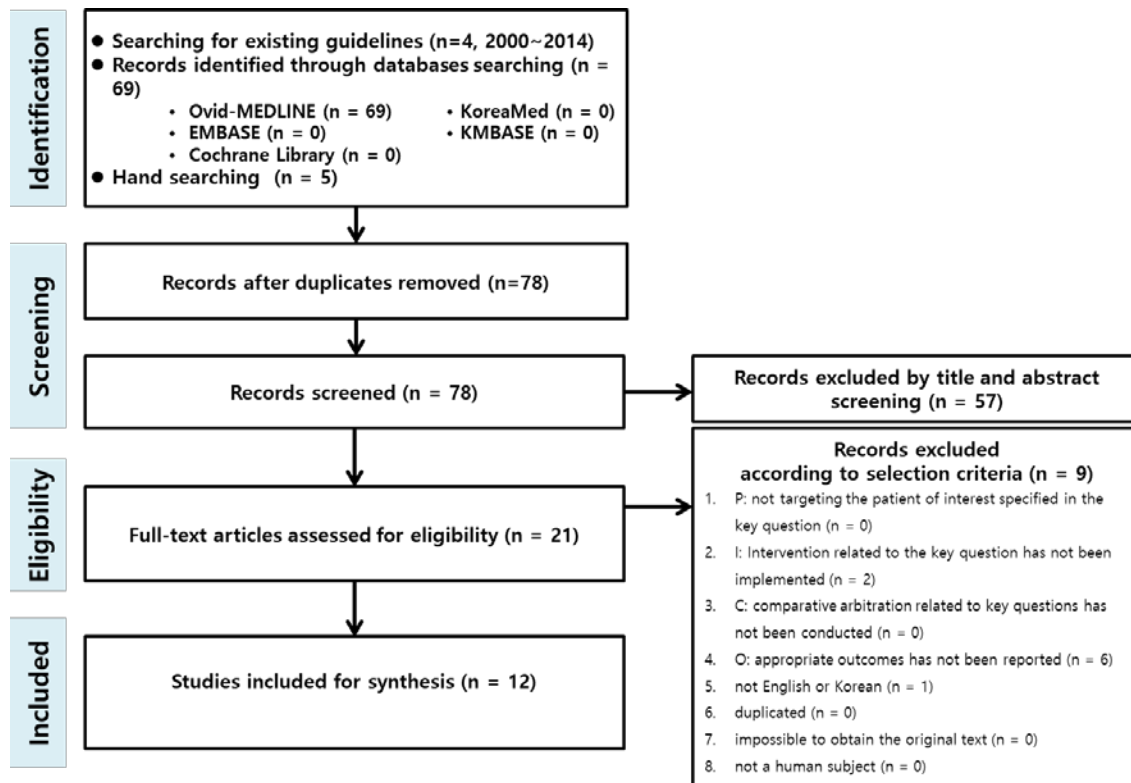

## Key question 8.2.

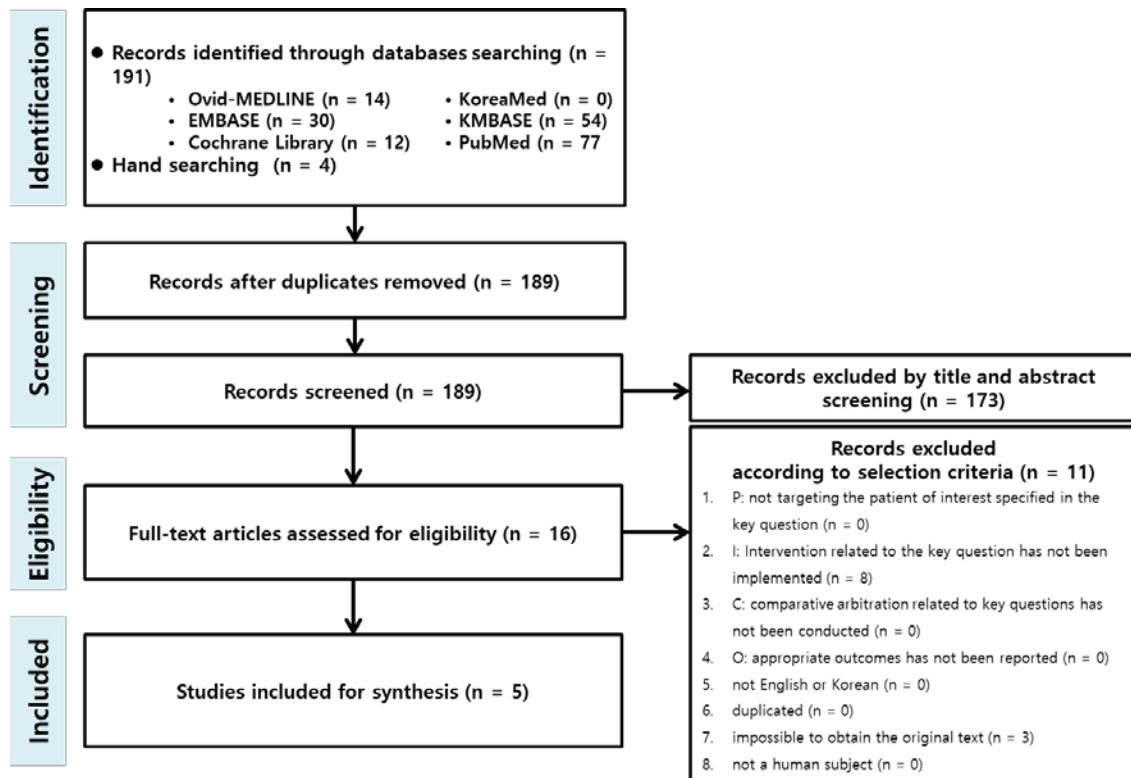

Supplement: j-krcp-21-600suppl5.pdf [file j-krcp-21-600suppl5.pdf]
