# Supplementary material for: Korean Society of Nephrology 2021 Clinical Practice Guideline for Optimal Hemodialysis Treatment
Source: PubMed Central journal article supplement — Kidney Res Clin Pract. 2021 Dec 10;40(Suppl 1):S1–S37. doi: 10.23876/j.krcp.21.600 (PMC8694695; doi:10.23876/j.krcp.21.600), 2021-12-10
Supplement: j-krcp-21-600suppl1.pdf [file j-krcp-21-600suppl1.pdf]

## **Supplement 1| Composition of the Work Group**

### **Work Group**

#### **Kook-Hwan Oh**

Chairperson of the Korean society of nephrology (KSN) clinical practice guideline (CPG) committee  
Nephrologist  
Division of Nephrology, Department of Internal Medicine, Seoul National University Hospital, Seoul, Republic of Korea

#### **Ji Yong Jung**

Executive Secretary / Editorial Staff of the KSN CPG committee  
Nephrologist  
Division of Nephrology, Department of Internal Medicine, Gachon University Gil Medical Center, Gachon University College of Medicine, Incheon, Republic of Korea

#### **Kyung Don Yoo**

Executive Secretary of the KSN CPG committee  
Nephrologist  
Division of Nephrology, Department of Nephrology, Ulsan University Hospital, University of Ulsan College of Medicine

#### **Eunjeong Kang**

Member / Editorial Staff of the KSN CPG committee  
Nephrologist  
Division of Nephrology, Department of Internal Medicine, Ewha Womans University Seoul Hospital, Ewha Womans College of Medicine, Seoul, Republic of Korea

#### **Hee Gyung Kang**

Member of the KSN CPG committee  
Pediatric Nephrologist  
Division of Pediatric Nephrology, Department of Pediatrics, Seoul National University Children's Hospital, Seoul, Republic of Korea

#### **Su Hyun Kim**

Member of the KSN CPG committee  
Nephrologist  
Division of Nephrology, Department of Internal Medicine, Chung-Ang University Hospital, Seoul, Republic of Korea

#### **Hyoungnae Kim**

Member / Editorial Staff of the KSN CPG committee  
Nephrologist  
Division of Nephrology, Department of Internal Medicine, Soonchunhyang University Seoul Hospital, Seoul, Republic of Korea

#### **Hyo Jin Kim**

Member of the KSN CPG committee  
Nephrologist  
Division of Nephrology, Department of Internal Medicine, Pusan National University Hospital, Busan, Republic of Korea

**Tae-Jin Park**

Member of the KSN CPG committee  
Nephrologist  
Asan Jin Internal Medicine Clinic, Seoul, Republic of Korea

**Sang Heon Suh**

Member / Editorial Staff of the KSN CPG committee  
Nephrologist  
Division of Nephrology, Department of Internal Medicine, Chonnam National University Hospital,  
Gwangju, Republic of Korea

**Jong Cheol Jeong**

Member of the KSN CPG committee  
Nephrologist  
Division of Nephrology, Department of Internal Medicine, Seoul National University Bundang  
Hospital, Seongnam, Republic of Korea

**Ji-Young Choi**

Member of the KSN CPG committee  
Nephrologist  
Division of Nephrology, Department of Internal Medicine, Kyungpook National University Chilgok  
Hospital, Daegu, Republic of Korea

**Young-Hwan Hwang**

Member / Editorial Staff of the KSN CPG committee  
Nephrologist  
Truewords Dialysis Clinic, Incheon, Republic of Korea

**Miyoung Choi**

Method Support Team of the KSN CPG committee  
Clinical Evidence Research Team Leader  
Division for Healthcare Technology Assessment Research, National Evidence-Based Healthcare  
Collaborating Agency, Seoul, Republic of Korea

**Yae Lim Kim**

Method Support Team / Editorial Staff of the KSN CPG committee  
Statistics researcher  
Department of Biostatistics, Korea University College of Medicine
