# Supplementary material for: Korean Society of Nephrology 2021 Clinical Practice Guideline for Optimal Hemodialysis Treatment
Source: PubMed Central journal article supplement — Kidney Res Clin Pract. 2021 Dec 10;40(Suppl 1):S1–S37. doi: 10.23876/j.krcp.21.600 (PMC8694695; doi:10.23876/j.krcp.21.600), 2021-12-10
Supplement: j-krcp-21-600suppl3.pdf [file j-krcp-21-600suppl3.pdf]

## Supplement 3| Review Questions - PICO Format

### Key question 1.1.

---

|              |                                                                                                                                                                                                              |
|--------------|--------------------------------------------------------------------------------------------------------------------------------------------------------------------------------------------------------------|
| Population   | Chronic kidney disease (CKD) stage 5, CKD G5, Dialysis, Hemodialysis (HD), Renal replacement therapy (RRT), End-stage renal disease (ESRD), End-stage kidney disease (ESKD), End-stage kidney failure (ESKF) |
| Intervention | Early start of dialysis (eGFR >10),<br>Early start of dialysis (moderate symptoms)                                                                                                                           |
| Comparator   | Late start of dialysis (eGFR ≤10),<br>Late start of dialysis (severe symptoms)                                                                                                                               |
| Outcome      | Primary: mortality, hospitalization, quality of life, healthcare resource spent<br>Secondary: wellbeing, cognitive dysfunction, infection, vascular access problem                                           |

---

### Key question 1.2.

---

|              |                                                                                                                                                                                                |
|--------------|------------------------------------------------------------------------------------------------------------------------------------------------------------------------------------------------|
| Population   | Dialysis, hemodialysis (HD), renal replacement therapy (RRT), end-stage renal disease (ESRD), end-stage kidney disease (ESKD), end-stage kidney failure (ESKF), Chronic kidney disease stage V |
| Intervention | AVF formation at eGFR 15                                                                                                                                                                       |
| Comparator   | Observation                                                                                                                                                                                    |
| Outcome      | Infection, maturation failure rate, patient survival                                                                                                                                           |

---

### Key question 2.1.

---

|              |                                                                                                                                                                                          |
|--------------|------------------------------------------------------------------------------------------------------------------------------------------------------------------------------------------|
| Population   | Dialysis, hemodialysis (HD), end-stage renal disease (ESRD), end-stage kidney disease (ESKD), end-stage kidney failure (ESKF)                                                            |
| Intervention | Dialysis dose, frequency, time, duration (3 times a week, 3-5 hours/session)                                                                                                             |
| Comparator   | Dialysis dose, frequency, time, duration (2 times a week, <3 hours/session)                                                                                                              |
| Outcome      | Maintenance of dialysis adequacy, efficiency of dialysis treatment, survival rates for dialysis patients, socioeconomic cost of dialysis treatment, quality of life in dialysis patients |

---

### Key question 2.2.

---

|              |                                                                                                                                                                                          |
|--------------|------------------------------------------------------------------------------------------------------------------------------------------------------------------------------------------|
| Population   | Dialysis, hemodialysis (HD), end-stage renal disease (ESRD), end-stage kidney disease (ESKD), end-stage kidney failure (ESKF)                                                            |
| Intervention | Kt/V, dialyzer clearance of urea, dialysis adequacy, hemodialysis kinetics ( $Kt/V \geq 1.3$ )                                                                                           |
| Comparator   | Kt/V, dialyzer clearance of urea, dialysis adequacy, hemodialysis kinetics ( $Kt/V \geq 1.2$ )                                                                                           |
| Outcome      | Maintenance of dialysis adequacy, efficiency of dialysis treatment, survival rates for dialysis patients, socioeconomic cost of dialysis treatment, quality of life in dialysis patients |

---

### Key question 3.1.

---

|              |                                                       |
|--------------|-------------------------------------------------------|
| Population   | Hemodialysis OR dialysis OR HD                        |
| Intervention | Hemodiafiltration OR high-flux dialyzer               |
| Comparator   | Low-flux membrane OR low-flux dialyzer                |
| Outcome      | All-cause mortality, cardiovascular disease mortality |

---

### Key question 3.2.

---

|            |                                |
|------------|--------------------------------|
| Population | Hemodialysis OR dialysis OR HD |
|------------|--------------------------------|

---

|                     |                                                                                                     |
|---------------------|-----------------------------------------------------------------------------------------------------|
| <b>Intervention</b> | Hemodiafiltration                                                                                   |
| <b>Comparator</b>   | High flux                                                                                           |
| <b>Outcome</b>      | Mortality, cardiovascular mortality, nonfatal cardiovascular events, health-related quality of life |

---

#### **Key question 4.1.**

|                     |                                                                                                                                                                                                              |
|---------------------|--------------------------------------------------------------------------------------------------------------------------------------------------------------------------------------------------------------|
| <b>Population</b>   | Hemodialysis (HD), End-stage renal disease (ESRD), End-stage kidney failure (ESKF), thrombocytopenia, postoperative hemorrhages, gastrointestinal hemorrhage, intracranial hemorrhages, bleeding, hemorrhage |
| <b>Intervention</b> | Low molecular weight heparin                                                                                                                                                                                 |
| <b>Comparator</b>   | Unfractionated heparin                                                                                                                                                                                       |
| <b>Outcome</b>      | Bleeding complication, thromboembolic event (including circuit thrombosis)                                                                                                                                   |

---

#### **Key question 4.2.**

|                     |                                                                                                                                                                                                              |
|---------------------|--------------------------------------------------------------------------------------------------------------------------------------------------------------------------------------------------------------|
| <b>Population</b>   | Hemodialysis (HD), End-stage renal disease (ESRD), End-stage kidney failure (ESKF), thrombocytopenia, postoperative hemorrhages, gastrointestinal hemorrhage, intracranial hemorrhages, bleeding, hemorrhage |
| <b>Intervention</b> | Nafamostat                                                                                                                                                                                                   |
| <b>Comparator</b>   | Heparin-free OR no anticoagulation                                                                                                                                                                           |
| <b>Outcome</b>      | Bleeding complication, Thromboembolic event (including circuit thrombosis)                                                                                                                                   |

---

#### **Key question 5.1.**

|                     |                                                                                                                                                                                                        |
|---------------------|--------------------------------------------------------------------------------------------------------------------------------------------------------------------------------------------------------|
| <b>Population</b>   | Dialysis, hemodialysis (HD), end-stage renal disease (ESRD), end-stage kidney disease (ESKD), end-stage kidney failure (ESKF)                                                                          |
| <b>Intervention</b> | Control of interdialytic weight gain (IDWG), dry weight (DW), body weight, fluid balance, volume control, ultrafiltration (UF), ultrafiltration rate (UFR), weight gain, thirst, xerostomia, dialysate |
| <b>Comparator</b>   | No control of IDWG                                                                                                                                                                                     |
| <b>Outcome</b>      | Overall survival, all-cause mortality, cardiovascular mortality, intradialytic hypotension (IDH)                                                                                                       |

---

#### **Key question 5.2.**

|                     |                                                                                                                               |
|---------------------|-------------------------------------------------------------------------------------------------------------------------------|
| <b>Population</b>   | Dialysis, hemodialysis (HD), end-stage renal disease (ESRD), end-stage kidney disease (ESKD), end-stage kidney failure (ESKF) |
| <b>Intervention</b> | Low sodium dialysate (134-138)                                                                                                |
| <b>Comparator</b>   | Standard sodium dialysate (138-140)                                                                                           |
| <b>Outcome</b>      | CHF hospitalization, interdialytic weight gain                                                                                |

---

#### **Key question 6.1.**

|                     |                                                                                                                                                                |
|---------------------|----------------------------------------------------------------------------------------------------------------------------------------------------------------|
| <b>Population</b>   | Dialysis, hemodialysis (HD), renal replacement therapy (RRT), end-stage renal disease (ESRD), end-stage kidney disease (ESKD), end-stage kidney failure (ESKF) |
| <b>Intervention</b> | Predialysis systolic blood pressure (<140mmHg)                                                                                                                 |
| <b>Comparator</b>   | Predialysis systolic blood pressure (≥140mmHg)                                                                                                                 |
| <b>Outcome</b>      | Overall mortality, cardiovascular mortality, cardiovascular disease incidence                                                                                  |

---

#### **Key question 6.2.**

|                   |                                                                                                                                                                |
|-------------------|----------------------------------------------------------------------------------------------------------------------------------------------------------------|
| <b>Population</b> | Dialysis, hemodialysis (HD), renal replacement therapy (RRT), end-stage renal disease (ESRD), end-stage kidney disease (ESKD), end-stage kidney failure (ESKF) |
|-------------------|----------------------------------------------------------------------------------------------------------------------------------------------------------------|

|                     |                                             |
|---------------------|---------------------------------------------|
| <b>Intervention</b> | Low dialysate temperature ( $\leq 36$ °C)   |
| <b>Comparator</b>   | Standard dialysate temperature ( $> 36$ °C) |
| <b>Outcome</b>      | Intradialytic hypotension                   |

---

### **Key question 7.1.**

|                     |                                                                                                                                                        |
|---------------------|--------------------------------------------------------------------------------------------------------------------------------------------------------|
| <b>Population</b>   | Hemodialysis patients                                                                                                                                  |
| <b>Intervention</b> | Adequacy, Kt/V, hemodialysis dose, measurement of dialysis, blood sampling                                                                             |
| <b>Comparator</b>   | Inspection items and inspection interval: comparison with existing adequacy evaluation                                                                 |
| <b>Outcome</b>      | Maintenance of dialysis adequacy, survival rates for dialysis patients, socioeconomic cost of dialysis treatment, quality of life in dialysis patients |

---

### **Key question 8.1.**

|                     |                                                                                                                                              |
|---------------------|----------------------------------------------------------------------------------------------------------------------------------------------|
| <b>Population</b>   | “ESRD or end-stage renal failure or stage-5 CKD or advanced CKD or CKD4 or CKD5” and “dialysis or renal replacement therapy or hemodialysis” |
| <b>Intervention</b> | Hemodialysis                                                                                                                                 |
| <b>Comparator</b>   | “nondialytic or conservative treatment or palliative care or conservative management” or “end of life care or palliative care”               |
| <b>Outcome</b>      | Survival rate, quality of life                                                                                                               |

---

### **Key question 8.2.**

|                     |                                                                                                                                                                                                               |
|---------------------|---------------------------------------------------------------------------------------------------------------------------------------------------------------------------------------------------------------|
| <b>Population</b>   | "End-stage renal disease or End-stage kidney disease or end-stage kidney failure or end-stage renal failure" AND "dialysis or hemodialysis or renal replacement therapy" AND "child or children or pediatric" |
| <b>Intervention</b> | Nurse or nursing (nurse: patient ratio less than 1:5)                                                                                                                                                         |
| <b>Comparator</b>   | Nurse or nursing (nurse: patient Ratio 1:5)                                                                                                                                                                   |
| <b>Outcome</b>      | Survival rate                                                                                                                                                                                                 |

---
