# Supplementary material for: Korean Society of Nephrology 2021 Clinical Practice Guideline for Optimal Hemodialysis Treatment
Source: PubMed Central journal article supplement — Kidney Res Clin Pract. 2021 Dec 10;40(Suppl 1):S1–S37. doi: 10.23876/j.krcp.21.600 (PMC8694695; doi:10.23876/j.krcp.21.600), 2021-12-10
Supplement: j-krcp-21-600suppl4.pdf [file j-krcp-21-600suppl4.pdf]

## Supplement 4| Search Strategies

### Selection of guidelines for quality evaluation in the adaptation development process

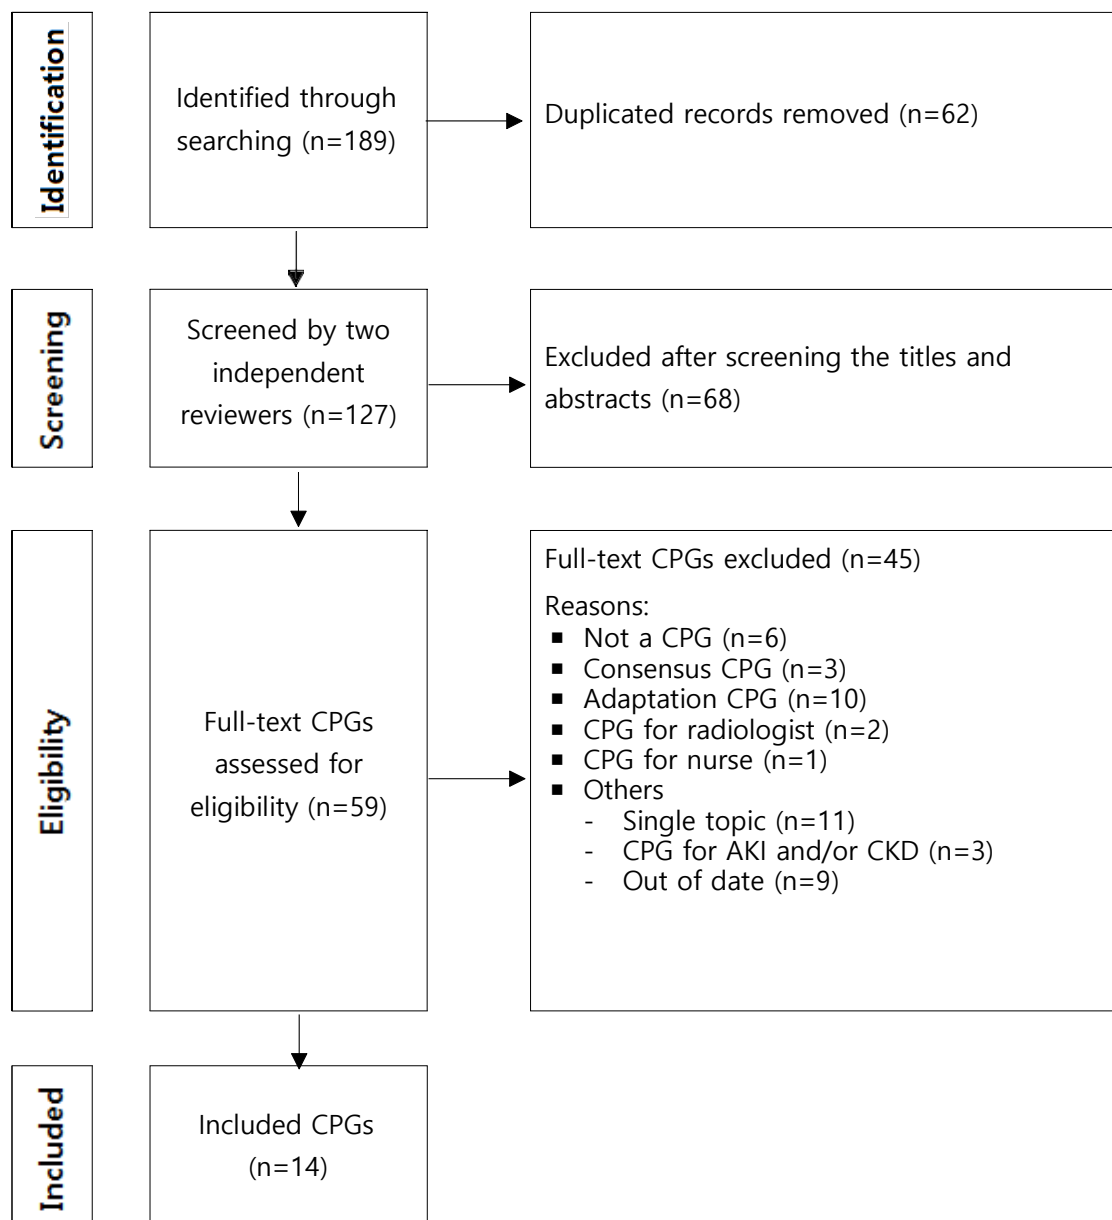

CPG, Clinical practice guideline; AKI, Acute kidney injury; CKD, Chronic kidney disease

### Key question 1.1.

| Searching date: 2020.11.2. Ovid-Medline |                                                                                                                                   |         |
|-----------------------------------------|-----------------------------------------------------------------------------------------------------------------------------------|---------|
| No.                                     | Search terms                                                                                                                      | Results |
| 1                                       | exp Kidney Failure, Chronic/                                                                                                      | 94,213  |
| 2                                       | (end?sta* kidney OR end?sta* renal OR kidney fail* OR renal fail* OR chronic renal OR chronic kidney OR ESRD OR ESKD OR ESKF).tw. | 162,676 |
| 3                                       | 1 OR 2                                                                                                                            | 210,925 |
| 4                                       | exp Renal Dialysis/ OR exp Renal Replacement Therapy/                                                                             | 212,416 |

|    |                                                                                           |         |
|----|-------------------------------------------------------------------------------------------|---------|
| 5  | (hemodialysis OR renal replacement therapy OR HD OR RRT).tw.                              | 104,590 |
| 6  | 4 OR 5                                                                                    | 261,084 |
| 7  | 3 AND 6                                                                                   | 82,096  |
| 8  | ((hemodialysis or HD) adj2 (initiat* or start* OR timing OR early OR late OR begin*)).tw. | 3,032   |
| 9  | 7 AND 8                                                                                   | 1,555   |
| 10 | limit 9 to yr="2017-Current"                                                              | 356     |

### Key question 1.2.

| Searching date: 2020.11.2. Ovid-Medline |                                                                                                                                   |         |
|-----------------------------------------|-----------------------------------------------------------------------------------------------------------------------------------|---------|
| No.                                     | Search terms                                                                                                                      | Results |
| 1                                       | exp Kidney Failure, Chronic/                                                                                                      | 94,213  |
| 2                                       | (end?sta* kidney OR end?sta* renal OR kidney fail* OR renal fail* OR chronic renal OR chronic kidney OR ESRD OR ESKD OR ESKF).tw. | 162,676 |
| 3                                       | 1 OR 2                                                                                                                            | 210,925 |
| 4                                       | exp Renal Dialysis/ OR exp Renal Replacement Therapy/                                                                             | 212,416 |
| 5                                       | (hemodialysis OR renal replacement therapy OR HD OR RRT).tw.                                                                      | 104,590 |
| 6                                       | 4 OR 5                                                                                                                            | 261,084 |
| 7                                       | 3 AND 6                                                                                                                           | 82,096  |
| 9                                       | exp Arteriovenous Fistula/                                                                                                        | 14,629  |
| 10                                      | (Arteriovenous fistula formation or AVF).tw.                                                                                      | 4,745   |
| 11                                      | 9 OR 10                                                                                                                           | 18,493  |
| 12                                      | 7 AND 11                                                                                                                          | 1,010   |
| 13                                      | limit 12 to yr="2017-Current"                                                                                                     | 260     |

### Key question 2.1.

| Searching date: 2020.11.2. Ovid-Medline |                                                                                                                                   |         |
|-----------------------------------------|-----------------------------------------------------------------------------------------------------------------------------------|---------|
| No.                                     | Search terms                                                                                                                      | Results |
| 1                                       | exp Kidney Failure, Chronic/                                                                                                      | 94,213  |
| 2                                       | (end?sta* kidney OR end?sta* renal OR kidney fail* OR renal fail* OR chronic renal OR chronic kidney OR ESRD OR ESKD OR ESKF).tw. | 162,676 |
| 3                                       | 1 OR 2                                                                                                                            | 210,925 |
| 4                                       | exp Renal Dialysis/ OR exp Renal Replacement Therapy/                                                                             | 212,416 |
| 5                                       | (hemodialysis OR renal replacement therapy OR HD OR RRT).tw.                                                                      | 104,590 |
| 6                                       | 4 OR 5                                                                                                                            | 261,084 |
| 7                                       | 3 AND 6                                                                                                                           | 82,096  |
| 8                                       | ((hemodialysis OR HD) adj2 (dose OR frequency OR time OR duration OR schedule)).tw.                                               | 3,808   |
| 9                                       | 7 AND 8                                                                                                                           | 1,384   |
| 10                                      | limit 9 to yr="2018-Current"                                                                                                      | 157     |

### Key question 2.2.

| Searching date: 2020.11.2. Ovid-Medline |                                                                                                                                   |         |
|-----------------------------------------|-----------------------------------------------------------------------------------------------------------------------------------|---------|
| No.                                     | Search terms                                                                                                                      | Results |
| 1                                       | exp Kidney Failure, Chronic/                                                                                                      | 94,213  |
| 2                                       | (end?sta* kidney OR end?sta* renal OR kidney fail* OR renal fail* OR chronic renal OR chronic kidney OR ESRD OR ESKD OR ESKF).tw. | 162,676 |
| 3                                       | 1 OR 2                                                                                                                            | 210,925 |
| 4                                       | exp Renal Dialysis/ OR exp Renal Replacement Therapy/                                                                             | 212,416 |

|    |                                                                               |         |
|----|-------------------------------------------------------------------------------|---------|
| 5  | (hemodialysis OR renal replacement therapy OR HD OR RRT).tw.                  | 104,590 |
| 6  | 4 OR 5                                                                        | 261,084 |
| 7  | 3 AND 6                                                                       | 82,096  |
| 8  | (Kt?V OR dialyzer clearance OR dialysis adequa* OR Hemodialysis Kinetic*).tw. | 1,246   |
| 9  | 7 AND 8                                                                       | 633     |
| 10 | limit 9 to yr="2018-Current"                                                  | 53      |

### Key question 3.1.

| Searching date: 2020.11.2. Ovid-Medline |                                                                                                                                   |         |
|-----------------------------------------|-----------------------------------------------------------------------------------------------------------------------------------|---------|
| No.                                     | Search terms                                                                                                                      | Results |
| 1                                       | exp Kidney Failure, Chronic/                                                                                                      | 94,213  |
| 2                                       | (end?sta* kidney OR end?sta* renal OR kidney fail* OR renal fail* OR chronic renal OR chronic kidney OR ESRD OR ESKD OR ESKF).tw. | 162,676 |
| 3                                       | 1 OR 2                                                                                                                            | 210,925 |
| 4                                       | exp Renal Dialysis/ OR exp Renal Replacement Therapy/                                                                             | 212,416 |
| 5                                       | (hemodialysis OR renal replacement therapy OR HD OR RRT).tw.                                                                      | 104,590 |
| 6                                       | 4 OR 5                                                                                                                            | 261,084 |
| 7                                       | 3 AND 6                                                                                                                           | 82,096  |
| 8                                       | (high?flux OR low?flux OR (membrane adj2 flux) OR (flux adj2 dialyzer)).tw                                                        | 1,075   |
| 9                                       | 7 AND 8                                                                                                                           | 176     |

### Key question 3.2.

| Searching date: 2020.11.2. Ovid-Medline |                                                                                                                                   |         |
|-----------------------------------------|-----------------------------------------------------------------------------------------------------------------------------------|---------|
| No.                                     | Search terms                                                                                                                      | Results |
| 1                                       | exp Kidney Failure, Chronic/                                                                                                      | 94,213  |
| 2                                       | (end?sta* kidney OR end?sta* renal OR kidney fail* OR renal fail* OR chronic renal OR chronic kidney OR ESRD OR ESKD OR ESKF).tw. | 162,676 |
| 3                                       | 1 OR 2                                                                                                                            | 210,925 |
| 4                                       | exp Renal Dialysis/ OR exp Renal Replacement Therapy/                                                                             | 212,416 |
| 5                                       | (hemodialysis OR renal replacement therapy OR HD OR RRT).tw.                                                                      | 104,590 |
| 6                                       | 4 OR 5                                                                                                                            | 261,084 |
| 7                                       | 3 AND 6                                                                                                                           | 82,096  |
| 8                                       | exp Hemodiafiltration/ OR (Hemodiafiltration OR HDF).tw.                                                                          | 4,528   |
| 9                                       | 7 AND 8                                                                                                                           | 1,331   |
| 10                                      | limit 9 to yr="2018-Current"                                                                                                      | 128     |

### Key question 4.1.

| Searching date: 2020.11.2. Ovid-Medline |                                                                                                                                   |         |
|-----------------------------------------|-----------------------------------------------------------------------------------------------------------------------------------|---------|
| No.                                     | Search terms                                                                                                                      | Results |
| 1                                       | exp Kidney Failure, Chronic/                                                                                                      | 94,213  |
| 2                                       | (end?sta* kidney OR end?sta* renal OR kidney fail* OR renal fail* OR chronic renal OR chronic kidney OR ESRD OR ESKD OR ESKF).tw. | 162,676 |
| 3                                       | 1 OR 2                                                                                                                            | 210,925 |
| 4                                       | exp Renal Dialysis/ OR exp Renal Replacement Therapy/                                                                             | 212,416 |
| 5                                       | (hemodialysis OR renal replacement therapy OR HD OR RRT).tw.                                                                      | 104,590 |
| 6                                       | 4 OR 5                                                                                                                            | 261,084 |
| 7                                       | 3 AND 6                                                                                                                           | 82,096  |

|    |                                                          |         |
|----|----------------------------------------------------------|---------|
| 8  | (bleeding OR anticoagulat* OR hemorrhag* OR heparin).tw. | 474,832 |
| 9  | exp Heparin, Low-Molecular-Weight/                       | 12,847  |
| 10 | (low?molecular weight heparin OR LMWH).tw.               | 4,889   |
| 11 | 9 OR 10                                                  | 14,156  |
| 12 | 7 AND 8 AND 11                                           | 162     |

### Key question 4.2.

| Searching date: 2020.11.2. Ovid-Medline |                                                                                                                                                                             |         |
|-----------------------------------------|-----------------------------------------------------------------------------------------------------------------------------------------------------------------------------|---------|
| No.                                     | Search terms                                                                                                                                                                | Results |
| 1                                       | exp Kidney Failure, Chronic/                                                                                                                                                | 94,213  |
| 2                                       | (end?sta* kidney disease OR end?sta* kidney disease OR end?sta* kidney fail* OR kidney fail* OR renal fail* OR chronic renal OR chronic kidney OR ESRD OR ESKD OR ESKF).tw. | 162,676 |
| 3                                       | 1 OR 2                                                                                                                                                                      | 210,925 |
| 4                                       | exp Renal Dialysis/ OR exp Renal Replacement Therapy/                                                                                                                       | 212,416 |
| 5                                       | (hemodialysis OR renal replacement therapy OR HD OR RRT).tw.                                                                                                                | 104,590 |
| 6                                       | 4 OR 5                                                                                                                                                                      | 261,084 |
| 7                                       | 3 AND 6                                                                                                                                                                     | 82,096  |
| 8                                       | Nafamostat.tw.                                                                                                                                                              | 531     |
| 9                                       | 7 AND 8                                                                                                                                                                     | 31      |

### Key question 5.1.

| Searching date: 2020.11.3. Ovid-Medline |                                                                                                                                   |         |
|-----------------------------------------|-----------------------------------------------------------------------------------------------------------------------------------|---------|
| No.                                     | Search terms                                                                                                                      | Results |
| 1                                       | exp Kidney Failure, Chronic/                                                                                                      | 94,213  |
| 2                                       | (end?sta* kidney OR end?sta* renal OR kidney fail* OR renal fail* OR chronic renal OR chronic kidney OR ESRD OR ESKD OR ESKF).tw. | 162,676 |
| 3                                       | 1 OR 2                                                                                                                            | 210,925 |
| 4                                       | exp Renal Dialysis/ OR exp Renal Replacement Therapy/                                                                             | 212,416 |
| 5                                       | (hemodialysis OR renal replacement therapy OR HD OR RRT).tw.                                                                      | 104,590 |
| 6                                       | 4 OR 5                                                                                                                            | 261,084 |
| 7                                       | 3 AND 6                                                                                                                           | 82,096  |
| 8                                       | (interdialy* weight gain OR IDWG OR dry weight OR fluid balance OR volume control OR weight gain OR (control* adj2 weight)).tw.   | 102,849 |
| 9                                       | 7 AND 8                                                                                                                           | 1,190   |
| 10                                      | limit 9 to yr="2014-Current"                                                                                                      | 359     |

### Key question 5.2.

| Searching date: 2020.11.3. Ovid-Medline |                                                                                                                                   |         |
|-----------------------------------------|-----------------------------------------------------------------------------------------------------------------------------------|---------|
| No.                                     | Search terms                                                                                                                      | Results |
| 1                                       | exp Kidney Failure, Chronic/                                                                                                      | 94,213  |
| 2                                       | (end?sta* kidney OR end?sta* renal OR kidney fail* OR renal fail* OR chronic renal OR chronic kidney OR ESRD OR ESKD OR ESKF).tw. | 162,676 |
| 3                                       | 1 OR 2                                                                                                                            | 210,925 |
| 4                                       | exp Renal Dialysis/ OR exp Renal Replacement Therapy/                                                                             | 212,416 |
| 5                                       | (hemodialysis OR renal replacement therapy OR HD OR RRT).tw.                                                                      | 104,590 |
| 6                                       | 4 OR 5                                                                                                                            | 261,084 |

|    |                                                                             |        |
|----|-----------------------------------------------------------------------------|--------|
| 7  | 3 AND 6                                                                     | 82,096 |
| 8  | ((dialysate adj2 sodium) OR sodium concentrat* OR low sodium OR low Na).tw. | 11,092 |
| 9  | 7 AND 8                                                                     | 247    |
| 10 | limit 9 to yr="2005-Current"                                                | 145    |

### Key question 6.1.

| Searching date: 2020.11.3. Ovid-Medline |                                                                                                                                   |         |
|-----------------------------------------|-----------------------------------------------------------------------------------------------------------------------------------|---------|
| No.                                     | Search terms                                                                                                                      | Results |
| 1                                       | exp Kidney Failure, Chronic/                                                                                                      | 94,213  |
| 2                                       | (end?sta* kidney OR end?sta* renal OR kidney fail* OR renal fail* OR chronic renal OR chronic kidney OR ESRD OR ESKD OR ESKF).tw. | 162,676 |
| 3                                       | 1 OR 2                                                                                                                            | 210,925 |
| 4                                       | exp Renal Dialysis/ OR exp Renal Replacement Therapy/                                                                             | 212,416 |
| 5                                       | (hemodialysis OR renal replacement therapy OR HD OR RRT).tw.                                                                      | 104,590 |
| 6                                       | 4 OR 5                                                                                                                            | 261,084 |
| 7                                       | 3 AND 6                                                                                                                           | 82,096  |
| 8                                       | ((blood pressure OR BP) adj2 (monitor* OR control*)) OR 140 mmHg).tw.                                                             | 35,955  |
| 9                                       | 7 AND 8                                                                                                                           | 892     |
| 10                                      | limit 9 to yr="2017-Current"                                                                                                      | 131     |

### Key question 6.2.

| Searching date: 2020.11.3. Ovid-Medline |                                                                                                                                   |         |
|-----------------------------------------|-----------------------------------------------------------------------------------------------------------------------------------|---------|
| No.                                     | Search terms                                                                                                                      | Results |
| 1                                       | exp Kidney Failure, Chronic/                                                                                                      | 94,213  |
| 2                                       | (end?sta* kidney OR end?sta* renal OR kidney fail* OR renal fail* OR chronic renal OR chronic kidney OR ESRD OR ESKD OR ESKF).tw. | 162,676 |
| 3                                       | 1 OR 2                                                                                                                            | 210,925 |
| 4                                       | exp Renal Dialysis/ OR exp Renal Replacement Therapy/                                                                             | 212,416 |
| 5                                       | (hemodialysis OR renal replacement therapy OR HD OR RRT).tw.                                                                      | 104,590 |
| 6                                       | 4 OR 5                                                                                                                            | 261,084 |
| 7                                       | 3 AND 6                                                                                                                           | 82,096  |
| 8                                       | (dialysate adj2 temperature).tw.                                                                                                  | 129     |
| 9                                       | 7 AND 8                                                                                                                           | 45      |

### Key question 7.1.

| Searching date: 2020.11.3. Ovid-Medline |                                                                                                                                                           |         |
|-----------------------------------------|-----------------------------------------------------------------------------------------------------------------------------------------------------------|---------|
| No.                                     | Search terms                                                                                                                                              | Results |
| 1                                       | exp Kidney Failure, Chronic/                                                                                                                              | 94,213  |
| 2                                       | (end?sta* kidney OR end?sta* renal OR kidney fail* OR renal fail* OR chronic renal OR chronic kidney OR ESRD OR ESKD OR ESKF).tw.                         | 162,676 |
| 3                                       | 1 OR 2                                                                                                                                                    | 210,925 |
| 4                                       | exp Renal Dialysis/ OR exp Renal Replacement Therapy/                                                                                                     | 212,416 |
| 5                                       | (hemodialysis OR renal replacement therapy OR HD OR RRT).tw.                                                                                              | 104,590 |
| 6                                       | 4 OR 5                                                                                                                                                    | 261,084 |
| 7                                       | 3 AND 6                                                                                                                                                   | 82,096  |
| 8                                       | ((hemodialysis OR HD) adj2 (Adequacy OR Kt?V OR dose OR frequency OR interval OR Blood sampling OR management OR evaluation OR monitoring OR spKt?V)).tw. | 2,747   |

|    |                              |     |
|----|------------------------------|-----|
| 9  | 7 AND 8                      | 670 |
| 10 | limit 9 to yr="2017-Current" | 74  |

### Key question 8.1.

| Searching date: 2020.11.3. Ovid-Medline |                                                                                                                                   |           |
|-----------------------------------------|-----------------------------------------------------------------------------------------------------------------------------------|-----------|
| No.                                     | Search terms                                                                                                                      | Results   |
| 1                                       | exp Kidney Failure, Chronic/                                                                                                      | 94,213    |
| 2                                       | (end?sta* kidney OR end?sta* renal OR kidney fail* OR renal fail* OR chronic renal OR chronic kidney OR ESRD OR ESKD OR ESKF).tw. | 162,676   |
| 3                                       | 1 OR 2                                                                                                                            | 210,925   |
| 4                                       | exp Renal Dialysis/ OR exp Renal Replacement Therapy/                                                                             | 212,416   |
| 5                                       | (hemodialysis OR renal replacement therapy OR HD OR RRT).tw.                                                                      | 104,590   |
| 6                                       | 4 OR 5                                                                                                                            | 261,084   |
| 7                                       | 3 AND 6                                                                                                                           | 82,096    |
| 8                                       | exp Aged/ OR (aged OR elder OR old).tw.                                                                                           | 4,390,202 |
| 9                                       | (nondialytic or conservative treat* or palliative care or conservative manage* or end of life or Palliative care).tw.             | 90,590    |
| 10                                      | 8 AND 9                                                                                                                           | 31,684    |
| 11                                      | 7 AND 10                                                                                                                          | 478       |
| 12                                      | limit 11 to yr="2018-Current"                                                                                                     | 69        |

### Key question 8.2.

| Searching date: 2020.11.3. Ovid-Medline |                                                                                                                                   |           |
|-----------------------------------------|-----------------------------------------------------------------------------------------------------------------------------------|-----------|
| No.                                     | Search terms                                                                                                                      | Results   |
| 1                                       | exp Kidney Failure, Chronic/                                                                                                      | 94,213    |
| 2                                       | (end?sta* kidney OR end?sta* renal OR kidney fail* OR renal fail* OR chronic renal OR chronic kidney OR ESRD OR ESKD OR ESKF).tw. | 162,676   |
| 3                                       | 1 OR 2                                                                                                                            | 210,925   |
| 4                                       | exp Renal Dialysis/ OR exp Renal Replacement Therapy/                                                                             | 212,416   |
| 5                                       | (hemodialysis OR renal replacement therapy OR HD OR RRT).tw.                                                                      | 104,590   |
| 6                                       | 4 OR 5                                                                                                                            | 261,084   |
| 7                                       | 3 AND 6                                                                                                                           | 82,096    |
| 8                                       | exp Child/ OR exp Pediatrics/ OR (child* OR pediatric*).tw.                                                                       | 2,493,496 |
| 9                                       | ((nurse* OR nursing) and staff*).tw                                                                                               | 47,896    |
| 10                                      | (nurse?patient ratio* OR (nurse adj2 patient ratio*)).tw.                                                                         | 531       |
| 11                                      | 8 AND (9 OR 10)                                                                                                                   | 4,947     |
| 12                                      | 7 AND 11                                                                                                                          | 14        |

  

| Searching date: 2020.11.3. Ovid-EMBASE |                                                                                                                                   |         |
|----------------------------------------|-----------------------------------------------------------------------------------------------------------------------------------|---------|
| No.                                    | Search terms                                                                                                                      | Results |
| 1                                      | exp chronic kidney failure/                                                                                                       | 99,604  |
| 2                                      | (end?sta* kidney OR end?sta* renal OR kidney fail* OR renal fail* OR chronic renal OR chronic kidney OR ESRD OR ESKD OR ESKF).tw. | 242,360 |
| 3                                      | 1 OR 2                                                                                                                            | 276,820 |
| 4                                      | exp hemodialysis/ OR exp renal replacement therapy/                                                                               | 191,187 |
| 5                                      | (hemodialysis OR renal replacement therapy OR HD OR RRT).tw.                                                                      | 155,163 |

| 6                                           | 4 OR 5                                                                                                                                    | 255,906   |
|---------------------------------------------|-------------------------------------------------------------------------------------------------------------------------------------------|-----------|
| 7                                           | 3 AND 6                                                                                                                                   | 74,325    |
| 8                                           | exp child/ OR exp pediatrics/ OR (child* OR pediatric*).tw.                                                                               | 3,261,763 |
| 9                                           | ((nurse* OR nursing) and staff*).tw                                                                                                       | 69,708    |
| 10                                          | (nurse?patient ratio* OR (nurse adj2 patient ratio*)).tw.                                                                                 | 701       |
| 11                                          | 8 AND (9 OR 10)                                                                                                                           | 9,709     |
| 12                                          | 7 AND 11                                                                                                                                  | 30        |
| Searching date: 2020.11.3. Cochrane Library |                                                                                                                                           |           |
| No.                                         | Search terms                                                                                                                              | Results   |
| 1                                           | [mh "Kidney Failure, Chronic"]                                                                                                            | 4,681     |
| 2                                           | ("end?sta* kidney" OR "end?sta* renal" OR "kidney fail*" OR "renal fail*" OR "chronic renal" OR "chronic kidney" OR ESRD OR ESKD OR ESKF) | 13,062    |
| 3                                           | 1 OR#2                                                                                                                                    | 14,956    |
| 4                                           | [mh "Renal Dialysis"] OR [mh "Renal Replacement Therapy"]                                                                                 | 9,036     |
| 5                                           | (hemodialysis OR "renal replacement therapy" OR HD OR RRT)                                                                                | 20,495    |
| 6                                           | 4 OR 5                                                                                                                                    | 25,432    |
| 7                                           | 3 AND 6                                                                                                                                   | 6,200     |
| 8                                           | [mh Child] OR [mh Pediatrics] OR (child* OR pediatric*)                                                                                   | 192,873   |
| 9                                           | ((nurse* OR nursing) and staff*)                                                                                                          | 7,233     |
| 10                                          | ("nurse?patient ratio*" OR (nurse NEAR/2 patient ratio*))                                                                                 | 192       |
| 11                                          | 8 AND (9 OR 10)                                                                                                                           | 1,804     |
| 12                                          | 7 AND 11                                                                                                                                  | 12        |
