# Supplementary material for: Korean Society of Nephrology 2021 Clinical Practice Guideline for Optimal Hemodialysis Treatment
Source: PubMed Central journal article supplement — Kidney Res Clin Pract. 2021 Dec 10;40(Suppl 1):S1–S37. doi: 10.23876/j.krcp.21.600 (PMC8694695; doi:10.23876/j.krcp.21.600), 2021-12-10
Supplement: j-krcp-21-600suppl7.pdf [file j-krcp-21-600suppl7.pdf]

## Supplement 7| Bias Risk Assessment

|                                          | Random sequence generation (selection bias) | Allocation concealment (selection bias) | Blinding of participants and personnel (performance bias) | Blinding of outcome assessment (detection bias) | Incomplete outcome data (attrition bias) | Selective reporting (reporting bias) |
|------------------------------------------|---------------------------------------------|-----------------------------------------|-----------------------------------------------------------|-------------------------------------------------|------------------------------------------|--------------------------------------|
| Collins 2011 (IDEAL substudy)_HD planned | +                                           | ?                                       | ?                                                         | +                                               | +                                        | +                                    |
| Cooper 2010 (IDEAL trial)_HD or PD       | +                                           | ?                                       | ?                                                         | +                                               | +                                        | +                                    |
| Harris 2010 (IDEAL substudy)_HD or PD    | +                                           | ?                                       | ?                                                         | +                                               | -                                        | ?                                    |
| Whalley 2013 (IDEAL substudy)_HD or PD   | +                                           | ?                                       | ?                                                         | ?                                               | ?                                        | ?                                    |

  

|               | Participant comparability | Selection of participants | Confounding variables | Measurement of exposure | Blinding of outcome assessments | Outcome evaluation | Incomplete outcome data | Selective reporting |
|---------------|---------------------------|---------------------------|-----------------------|-------------------------|---------------------------------|--------------------|-------------------------|---------------------|
| Chang 2012    | +                         | ?                         | ?                     | +                       | ?                               | +                  | ?                       | ?                   |
| Clark 2011    | +                         | +                         | ?                     | ?                       | ?                               | +                  | ?                       | ?                   |
| Hwang 2010    | +                         | -                         | -                     | +                       | -                               | -                  | ?                       | -                   |
| Kazmi 2005    | +                         | +                         | ?                     | +                       | ?                               | +                  | ?                       | ?                   |
| Korevaar 2001 | +                         | ?                         | ?                     | ?                       | ?                               | +                  | +                       | +                   |
| Lassalle 2010 | +                         | +                         | +                     | +                       | ?                               | +                  | ?                       | ?                   |
| Traynor 2002  | +                         | -                         | ?                     | +                       | ?                               | +                  | ?                       | ?                   |
| Wright 2010   | +                         | +                         | ?                     | ?                       | ?                               | +                  | ?                       | ?                   |
| Zhang 2018    | +                         | +                         | ?                     | +                       | ?                               | +                  | ?                       | ?                   |

  

|                                                                                     |                   |                                                                                     |                      |                                                                                       |                  |
|-------------------------------------------------------------------------------------|-------------------|-------------------------------------------------------------------------------------|----------------------|---------------------------------------------------------------------------------------|------------------|
|  | High risk of bias |  | Unclear risk of bias |  | Low risk of bias |
|-------------------------------------------------------------------------------------|-------------------|-------------------------------------------------------------------------------------|----------------------|---------------------------------------------------------------------------------------|------------------|

Key question 1.1.

**Key question 1.2.**

|                | Participant comparability | Selection of participants | Confounding variables | Measurement of exposure | Blinding of outcome assessments | Outcome evaluation | Incomplete outcome data | Selective reporting |
|----------------|---------------------------|---------------------------|-----------------------|-------------------------|---------------------------------|--------------------|-------------------------|---------------------|
| Arhuidese 2019 | ⊖                         | ?                         | ?                     | ?                       | +                               | ⊖                  | ?                       | ?                   |
| Bae 2018       | ⊖                         | ?                         | ?                     | ?                       | +                               | ⊖                  | ?                       | ?                   |
| Kim 2020       | ⊖                         | ⊖                         | ?                     | ?                       | +                               | ⊖                  | ?                       | ?                   |
| Ozeki 2017     | ⊖                         | ⊖                         | ?                     | ?                       | +                               | ⊖                  | ?                       | ?                   |
| Saleh 2017     | ⊖                         | ?                         | ?                     | ?                       | +                               | ⊖                  | ?                       | ?                   |

⊖ High risk of bias   
 ? Unclear risk of bias   
 + Low risk of bias

## Key question 2.1.

|               | Random sequence generation (selection bias) | Allocation concealment (selection bias) | Blinding of participants and personnel (performance bias) | Blinding of outcome assessment (detection bias) | Incomplete outcome data (attrition bias) | Selective reporting (reporting bias) |
|---------------|---------------------------------------------|-----------------------------------------|-----------------------------------------------------------|-------------------------------------------------|------------------------------------------|--------------------------------------|
| Dember (2019) | High risk of bias                           | High risk of bias                       | High risk of bias                                         | Low risk of bias                                | Unclear risk of bias                     | Low risk of bias                     |
| Lowrie (1981) | High risk of bias                           | Unclear risk of bias                    | High risk of bias                                         | Unclear risk of bias                            | Unclear risk of bias                     | Unclear risk of bias                 |

|                                                                                                      |                                                                                                          |                                                                                                        |
|------------------------------------------------------------------------------------------------------|----------------------------------------------------------------------------------------------------------|--------------------------------------------------------------------------------------------------------|
|  Low risk of bias |  Unclear risk of bias |  High risk of bias |
|------------------------------------------------------------------------------------------------------|----------------------------------------------------------------------------------------------------------|--------------------------------------------------------------------------------------------------------|

## Key question 2.2.

|              | Random sequence generation (selection bias) | Allocation concealment (selection bias) | Blinding of participants and personnel (performance bias) | Blinding of outcome assessment (detection bias) | Incomplete outcome data (attrition bias) | Selective reporting (reporting bias) |
|--------------|---------------------------------------------|-----------------------------------------|-----------------------------------------------------------|-------------------------------------------------|------------------------------------------|--------------------------------------|
| Eknoyan 2002 | ?                                           | +                                       | +                                                         | +                                               | +                                        | +                                    |

|                    | Participant comparability | Selection of participants | Confounding variables | Measurement of exposure | Blinding of outcome assessments | Outcome evaluation | Incomplete outcome data | Selective reporting |
|--------------------|---------------------------|---------------------------|-----------------------|-------------------------|---------------------------------|--------------------|-------------------------|---------------------|
| Bloembergen 1996   | +                         | +                         | ?                     | +                       | ?                               | +                  | +                       | +                   |
| Chertow 1999       | +                         | +                         | -                     | +                       | ?                               | ?                  | +                       | ?                   |
| Held 1996          | +                         | +                         | ?                     | +                       | ?                               | +                  | ?                       | ?                   |
| Hong 2019          | +                         | +                         | ?                     | +                       | ?                               | +                  | +                       | ?                   |
| Port 2002          | +                         | +                         | ?                     | +                       | ?                               | +                  | ?                       | ?                   |
| Port 2004          | +                         | +                         | -                     | +                       | ?                               | +                  | ?                       | +                   |
| Ramirez 2012       | +                         | +                         | ?                     | +                       | ?                               | +                  | ?                       | ?                   |
| Salahudeen 2003    | +                         | +                         | ?                     | +                       | ?                               | ?                  | ?                       | ?                   |
| Shinzato 1996      | +                         | +                         | -                     | +                       | ?                               | +                  | ?                       | ?                   |
| Termorshuizen 2004 | +                         | +                         | ?                     | +                       | ?                               | +                  | -                       | +                   |
| Wolfe 2000         | +                         | +                         | -                     | +                       | ?                               | +                  | ?                       | ?                   |

|                                                                                                       |                                                                                                          |                                                                                                       |
|-------------------------------------------------------------------------------------------------------|----------------------------------------------------------------------------------------------------------|-------------------------------------------------------------------------------------------------------|
|  High risk of bias |  Unclear risk of bias |  Low risk of bias |
|-------------------------------------------------------------------------------------------------------|----------------------------------------------------------------------------------------------------------|-------------------------------------------------------------------------------------------------------|

### Key question 3.1.

|                | Random sequence generation (selection bias) | Allocation concealment (selection bias) | Blinding of participants and personnel (performance bias) | Blinding of outcome assessment (detection bias) | Incomplete outcome data (attrition bias) | Selective reporting (reporting bias) | Other bias |
|----------------|---------------------------------------------|-----------------------------------------|-----------------------------------------------------------|-------------------------------------------------|------------------------------------------|--------------------------------------|------------|
| Ayi 2005       | ?                                           | ?                                       | ●                                                         | ?                                               | +                                        | +                                    | ?          |
| Chazot 2015    | +                                           | ?                                       | ?                                                         | ?                                               | ●                                        | ?                                    | ?          |
| EGE Study 2013 | +                                           | ?                                       | ?                                                         | ?                                               | +                                        | +                                    | ?          |
| HEMO 2002      | +                                           | +                                       | ?                                                         | +                                               | +                                        | +                                    | +          |
| Klemm 2004     | ?                                           | ?                                       | ●                                                         | ?                                               | +                                        | ●                                    | ●          |
| Kuchle 1996    | ?                                           | ?                                       | ●                                                         | ?                                               | +                                        | +                                    | ?          |
| Lang 2001      | ●                                           | ●                                       | ●                                                         | ?                                               | ?                                        | ●                                    | ?          |
| Li 2010        | +                                           | +                                       | ●                                                         | ?                                               | +                                        | +                                    | ●          |
| Locatelli 1996 | ?                                           | +                                       | ●                                                         | ?                                               | +                                        | +                                    | +          |
| Locatelli 2000 | ?                                           | ?                                       | ●                                                         | ●                                               | +                                        | ?                                    | +          |
| MPO 2009       | +                                           | +                                       | ?                                                         | ●                                               | +                                        | +                                    | +          |
| Simon 1993     | ?                                           | ?                                       | ●                                                         | ?                                               | +                                        | +                                    | ?          |

● High risk of bias    ? Unclear risk of bias    + Low risk of bias

### Key question 3.2.

|              | Random sequence generation (selection bias) | Allocation concealment (selection bias) | Blinding of participants and personnel (performance bias) | Blinding of outcome assessment (detection bias) | Incomplete outcome data (attrition bias) | Selective reporting (reporting bias) | Other bias |
|--------------|---------------------------------------------|-----------------------------------------|-----------------------------------------------------------|-------------------------------------------------|------------------------------------------|--------------------------------------|------------|
| Maduell 2013 | +                                           | ?                                       | -                                                         | -                                               | -                                        | +                                    | -          |
| Morena 2017  | ?                                           | ?                                       | ?                                                         | ?                                               | -                                        | -                                    | ?          |
| Ok 2013      | ?                                           | ?                                       | -                                                         | -                                               | -                                        | +                                    | ?          |

|                                                                                                       |                                                                                                          |                                                                                                      |
|-------------------------------------------------------------------------------------------------------|----------------------------------------------------------------------------------------------------------|------------------------------------------------------------------------------------------------------|
|  High risk of bias |  Unclear risk of bias |  Low risk of bias |
|-------------------------------------------------------------------------------------------------------|----------------------------------------------------------------------------------------------------------|------------------------------------------------------------------------------------------------------|

| <b>AMSTART criteria</b>                                                                           | <b>Suwabe (2018)</b> |
|---------------------------------------------------------------------------------------------------|----------------------|
| Was an 'a priori' design provided?                                                                | Yes                  |
| Was there duplicate study selection and data extraction?                                          | Yes                  |
| Was a comprehensive literature search performed?                                                  | Yes                  |
| Was the status of publication (i.e. grey literature) used as an inclusion criterion?              | No                   |
| Was a list of studies (included and excluded) provided?                                           | No                   |
| Were the characteristics of the included studies provided?                                        | Yes                  |
| Was the scientific quality of the included studies assessed and documented?                       | Yes                  |
| Was the scientific quality of the included studies used appropriately in formulating conclusions? | Yes                  |
| Were the methods used to combine the findings of studies appropriate?                             | Yes                  |
| Was the likelihood of publication bias assessed?                                                  | Yes                  |
| Was the conflict of interest stated?                                                              | No                   |
| Total                                                                                             | 9                    |

### Key question 4.1.

|                 | Random sequence generation (selection bias) | Allocation concealment (selection bias) | Blinding of participants and personnel (performance bias) | Blinding of outcome assessment (detection bias) | Incomplete outcome data (attrition bias) | Selective reporting (reporting bias) | Other bias |
|-----------------|---------------------------------------------|-----------------------------------------|-----------------------------------------------------------|-------------------------------------------------|------------------------------------------|--------------------------------------|------------|
| Bambauer 1990   | ?                                           | ?                                       | -                                                         | +                                               | +                                        | +                                    | +          |
| Lord 2002       | ?                                           | ?                                       | -                                                         | +                                               | +                                        | +                                    | +          |
| Nurmohamed 1991 | ?                                           | ?                                       | ?                                                         | +                                               | +                                        | +                                    | +          |
| Saltissi 1999   | ?                                           | ?                                       | -                                                         | +                                               | +                                        | +                                    | +          |
| Schrader 1988   | ?                                           | ?                                       | -                                                         | +                                               | +                                        | +                                    | -          |
| Stefoni 2002    | ?                                           | ?                                       | -                                                         | +                                               | +                                        | +                                    | +          |

 High risk of bias    
  Unclear risk of bias    
  Low risk of bias



**Key question 4.2.**

|           | Random sequence generation (selection bias) | Allocation concealment (selection bias) | Blinding of participants and personnel (performance bias) | Blinding of outcome assessment (detection bias) | Incomplete outcome data (attrition bias) | Selective reporting (reporting bias) | Other bias |
|-----------|---------------------------------------------|-----------------------------------------|-----------------------------------------------------------|-------------------------------------------------|------------------------------------------|--------------------------------------|------------|
| Kim 2004  | -                                           | -                                       | -                                                         | -                                               | +                                        | +                                    |            |
| Yang 2009 | -                                           | -                                       | -                                                         | -                                               | -                                        | +                                    |            |

|                                                                                                       |                                                                                                          |                                                                                                       |
|-------------------------------------------------------------------------------------------------------|----------------------------------------------------------------------------------------------------------|-------------------------------------------------------------------------------------------------------|
|  High risk of bias |  Unclear risk of bias |  Low risk of bias |
|-------------------------------------------------------------------------------------------------------|----------------------------------------------------------------------------------------------------------|-------------------------------------------------------------------------------------------------------|

### Key question 5.1.

|                 | Participants comparability | Selection of participants | Confounding variable | Measurement of exposure | Blinding of outcome assessment (detection bias) | Outcome evaluation | Incomplete outcome data (attrition bias) | Selective reporting (reporting bias) |
|-----------------|----------------------------|---------------------------|----------------------|-------------------------|-------------------------------------------------|--------------------|------------------------------------------|--------------------------------------|
| Dantas 2019     | +                          | +                         | -                    | +                       | +                                               | +                  | +                                        | +                                    |
| Foley 2002      | +                          | +                         | -                    | +                       | ?                                               | ?                  | ?                                        | +                                    |
| Hecking 2018    | +                          | +                         | -                    | +                       | +                                               | +                  | -                                        | +                                    |
| Kalantar 2009   | +                          | +                         | -                    | +                       | +                                               | ?                  | ?                                        | +                                    |
| Kurita 2017     | +                          | +                         | -                    | +                       | +                                               | +                  | +                                        | +                                    |
| Lee 2014        | +                          | +                         | -                    | +                       | +                                               | +                  | +                                        | +                                    |
| Leggat 1998     | +                          | +                         | -                    | +                       | +                                               | ?                  | ?                                        | +                                    |
| Saran 2003      | +                          | +                         | -                    | +                       | +                                               | +                  | +                                        | +                                    |
| Stefansson 2014 | +                          | +                         | -                    | +                       | +                                               | +                  | +                                        | +                                    |
| Stegmayr 2006   | +                          | +                         | -                    | +                       | ?                                               | ?                  | ?                                        | +                                    |
| Toida 2017      | +                          | +                         | -                    | +                       | +                                               | +                  | +                                        | +                                    |
| Wong 2017       | +                          | +                         | -                    | +                       | +                                               | +                  | +                                        | +                                    |

 High risk of bias     
  Unclear risk of bias     
  Low risk of bias

## Key question 5.2.

|                    | Random sequence generation (selection bias) | Allocation concealment (selection bias) | Blinding of participants and personnel (performance bias) | Blinding of outcome assessment (detection bias) | Incomplete outcome data (attrition bias) | Selective reporting (reporting bias) | Other bias |                                                 |
|--------------------|---------------------------------------------|-----------------------------------------|-----------------------------------------------------------|-------------------------------------------------|------------------------------------------|--------------------------------------|------------|-------------------------------------------------|
| Beduschi 2013      | +                                           | ?                                       | ?                                                         | ?                                               | ?                                        | +                                    | +          |                                                 |
| Boquin 1977        | +                                           | ?                                       | +                                                         | ?                                               | -                                        | +                                    | -          |                                                 |
| Liu 2016           | +                                           | ?                                       | -                                                         | +                                               | ?                                        | +                                    | -          |                                                 |
|                    |                                             |                                         |                                                           |                                                 |                                          |                                      |            | Participant comparability                       |
| Akyol (2017)       | +                                           | -                                       | ?                                                         | +                                               | -                                        | +                                    | ?          | Selection of Participants                       |
| Arramreddy (2012)  | +                                           | +                                       | ?                                                         | +                                               | -                                        | +                                    | ?          | Confounding variables                           |
| Kooman (2000)      | ?                                           | ?                                       | ?                                                         | ?                                               | -                                        | -                                    | ?          | Measurement of exposure                         |
| Sayarlioglu (2007) | +                                           | +                                       | ?                                                         | ?                                               | -                                        | -                                    | ?          | Blinding of outcome assessment (detection bias) |
| Zhou (2013)        | +                                           | +                                       | ?                                                         | +                                               | -                                        | +                                    | ?          | Outcome evaluation                              |
|                    |                                             |                                         |                                                           |                                                 |                                          |                                      |            | Incomplete outcome data                         |
|                    |                                             |                                         |                                                           |                                                 |                                          |                                      |            | Selective reporting                             |

|                                                                                                       |                                                                                                          |                                                                                                        |
|-------------------------------------------------------------------------------------------------------|----------------------------------------------------------------------------------------------------------|--------------------------------------------------------------------------------------------------------|
|  High risk of bias |  Unclear risk of bias |  Low risk of bias |
|-------------------------------------------------------------------------------------------------------|----------------------------------------------------------------------------------------------------------|--------------------------------------------------------------------------------------------------------|

**Key question 6.1.**

Not applicable

## Key question 6.2.

|                 | Random sequence generation (selection bias) | Allocation concealment (selection bias) | Blinding of participants and personnel (performance bias) | Blinding of outcome assessment (detection bias) | Incomplete outcome data (attrition bias) | Selective reporting (reporting bias) | Other bias |
|-----------------|---------------------------------------------|-----------------------------------------|-----------------------------------------------------------|-------------------------------------------------|------------------------------------------|--------------------------------------|------------|
| Ayoub 2004      | ?                                           | ?                                       | ⊖                                                         | ?                                               | ?                                        | ?                                    | ⊖          |
| Chesterton 2009 | ?                                           | ?                                       | ⊖                                                         | ⊖                                               | ?                                        | ?                                    | ⊖          |
| Fine 1996       | ?                                           | +                                       | ⊖                                                         | ⊖                                               | +                                        | +                                    | ⊖          |
| Jefferies 2011  | ?                                           | ?                                       | ⊖                                                         | ?                                               | +                                        | ?                                    | ⊖          |
| Jost 1993       | ?                                           | ?                                       | ⊖                                                         | ?                                               | +                                        | ?                                    | ⊖          |
| Maggiore 2002   | ?                                           | +                                       | ⊖                                                         | ⊖                                               | ⊖                                        | ?                                    | ⊖          |
| Selby 2006      | ?                                           | ?                                       | ⊖                                                         | ⊖                                               | ?                                        | ?                                    | ⊖          |

|               | Participant comparability | Selection of participants | Confounding variables | Measurement of exposure | Blinding of outcome assessments | Outcome evaluation | Incomplete outcome data | Selective reporting |
|---------------|---------------------------|---------------------------|-----------------------|-------------------------|---------------------------------|--------------------|-------------------------|---------------------|
| Azar 2009     | ⊖                         | +                         | ?                     | +                       | ⊖                               | ⊖                  | ?                       | ?                   |
| Cruz 1999     | ⊖                         | +                         | ?                     | +                       | ⊖                               | ⊖                  | ⊖                       | ?                   |
| Hegbrant 1994 | ⊖                         | +                         | ?                     | +                       | ⊖                               | ⊖                  | ?                       | ?                   |

|                                                                                                       |                                                                                                          |                                                                                                      |
|-------------------------------------------------------------------------------------------------------|----------------------------------------------------------------------------------------------------------|------------------------------------------------------------------------------------------------------|
|  High risk of bias |  Unclear risk of bias |  Low risk of bias |
|-------------------------------------------------------------------------------------------------------|----------------------------------------------------------------------------------------------------------|------------------------------------------------------------------------------------------------------|

**Key question 7.1.**

Not applicable

### Key question 8.1.

|                          | Participant comparability | Selection of participants | Confounding variable | Measurement of exposure | Blinding of outcome assessments | Outcome evaluation | Incomplete outcome data | Selecting reporting |
|--------------------------|---------------------------|---------------------------|----------------------|-------------------------|---------------------------------|--------------------|-------------------------|---------------------|
| Brown 2015               | +                         | +                         | +                    | +                       | +                               | +                  | ?                       | ?                   |
| Carson 2009              | +                         | +                         | -                    | +                       | +                               | +                  | ?                       | ?                   |
| July 2003                | +                         | +                         | -                    | +                       | +                               | +                  | ?                       | ?                   |
| Murtagh 2007             | +                         | +                         | -                    | +                       | +                               | +                  | ?                       | ?                   |
| Pyart 2020               | +                         | +                         | -                    | +                       | +                               | +                  | ?                       | ?                   |
| Raman 2017               | +                         | +                         | +                    | +                       | +                               | +                  | ?                       | ?                   |
| Reindl-Schwaighofer 2017 | -                         | +                         | -                    | +                       | +                               | -                  | -                       | +                   |
| Smith 2003               | -                         | ?                         | -                    | +                       | ?                               | +                  | -                       | +                   |
| Tam-Tham 2018            | +                         | +                         | ?                    | +                       | +                               | +                  | ?                       | ?                   |
| Tam-Tham 2020            | +                         | +                         | +                    | +                       | +                               | +                  | +                       | +                   |
| van Loon 2019            | +                         | +                         | +                    | +                       | +                               | +                  | +                       | +                   |
| Verberne 2016            | +                         | +                         | -                    | +                       | +                               | +                  | ?                       | ?                   |

|                                                                                                       |                                                                                                          |                                                                                                      |
|-------------------------------------------------------------------------------------------------------|----------------------------------------------------------------------------------------------------------|------------------------------------------------------------------------------------------------------|
|  High risk of bias |  Unclear risk of bias |  Low risk of bias |
|-------------------------------------------------------------------------------------------------------|----------------------------------------------------------------------------------------------------------|------------------------------------------------------------------------------------------------------|

| AMSTART criteria                                         | Foote (2016) | Wongrakpanich (2017) |
|----------------------------------------------------------|--------------|----------------------|
| Was an 'a priori' design provided?                       | Yes          | Yes                  |
| Was there duplicate study selection and data extraction? | Yes          | Yes                  |

|                                                                                                   |     |     |
|---------------------------------------------------------------------------------------------------|-----|-----|
| Was a comprehensive literature search performed?                                                  | Yes | Yes |
| Was the status of publication (i.e. grey literature) used as an inclusion criterion?              | Yes | Yes |
| Was a list of studies (included and excluded) provided?                                           | Yes | Yes |
| Were the characteristics of the included studies provided?                                        | Yes | Yes |
| Was the scientific quality of the included studies assessed and documented?                       | Yes | Yes |
| Was the scientific quality of the included studies used appropriately in formulating conclusions? | Yes | Yes |
| Were the methods used to combine the findings of studies appropriate?                             | Yes | Yes |
| Was the likelihood of publication bias assessed?                                                  | Yes | No  |
| Was the conflict of interest stated?                                                              | No  | No  |
| Total                                                                                             | 10  | 9   |

**Key question 8.2.**

Not applicable
