# Supplementary material for: Korean Society of Nephrology 2021 Clinical Practice Guideline for Optimal Hemodialysis Treatment
Source: PubMed Central journal article supplement — Kidney Res Clin Pract. 2021 Dec 10;40(Suppl 1):S1–S37. doi: 10.23876/j.krcp.21.600 (PMC8694695; doi:10.23876/j.krcp.21.600), 2021-12-10
Supplement: j-krcp-21-600suppl8.pdf [file j-krcp-21-600suppl8.pdf]

## Supplement 8 | Clinical Evidence Profiles (GRADE tables)

### Key question 1.1.

Clinical evidence profiles: clinical outcomes of early vs. late commencement of hemodialysis based on eGFR

| Certainty assessment                                   |                   |                        |               |              |                      |                      | № of patients   |                 | Effect                           |                                                         | Certainty        | Importance |
|--------------------------------------------------------|-------------------|------------------------|---------------|--------------|----------------------|----------------------|-----------------|-----------------|----------------------------------|---------------------------------------------------------|------------------|------------|
| № of studies                                           | Study design      | Risk of bias           | Inconsistency | Indirectness | Imprecision          | Other considerations | Early           | Late            | Relative (95% CI)                | Absolute (95% CI)                                       |                  |            |
| <b>All-cause mortality: events - HD or PD</b>          |                   |                        |               |              |                      |                      |                 |                 |                                  |                                                         |                  |            |
| 1                                                      | randomized trials | serious <sup>a</sup>   | not serious   | not serious  | not serious          | none                 | 152/404 (37.6%) | 155/424 (36.6%) | <b>RR 1.03</b><br>(0.86 to 1.23) | <b>11 more per 1,000</b><br>(from 51 fewer to 84 more)  | ⊕⊕⊕○<br>MODERATE | CRITICAL   |
| <b>All-cause mortality: events - HD planned</b>        |                   |                        |               |              |                      |                      |                 |                 |                                  |                                                         |                  |            |
| 1                                                      | randomized trials | serious <sup>a,b</sup> | not serious   | not serious  | serious <sup>c</sup> | none                 | 50/171 (29.2%)  | 59/191 (30.9%)  | <b>RR 0.95</b><br>(0.69 to 1.30) | <b>15 fewer per 1,000</b><br>(from 96 fewer to 93 more) | ⊕⊕○○<br>LOW      | IMPORTANT  |
| <b>All-cause mortality: time to event - HD or PD</b>   |                   |                        |               |              |                      |                      |                 |                 |                                  |                                                         |                  |            |
| 1                                                      | randomized trials | serious <sup>a</sup>   | not serious   | not serious  | serious <sup>c</sup> | none                 | 152/404 (37.6%) | 155/424 (36.6%) | <b>HR 1.04</b><br>(0.83 to 1.30) | <b>11 more per 1,000</b><br>(from 51 fewer to 81 more)  | ⊕⊕○○<br>LOW      | IMPORTANT  |
| <b>All-cause mortality: time to event - HD planned</b> |                   |                        |               |              |                      |                      |                 |                 |                                  |                                                         |                  |            |
| 1                                                      | randomized trials | serious <sup>a,b</sup> | not serious   | not serious  | serious <sup>c</sup> | none                 | 50/171 (29.2%)  | 59/191 (30.9%)  | <b>HR 0.97</b><br>(0.66 to 1.43) | <b>8 fewer per 1,000</b><br>(from 93 fewer to 0)        | ⊕⊕○○<br>LOW      | IMPORTANT  |

|  |  |  |  |  |  |  |  |  |  |           |  |  |
|--|--|--|--|--|--|--|--|--|--|-----------|--|--|
|  |  |  |  |  |  |  |  |  |  | 102 more) |  |  |
|--|--|--|--|--|--|--|--|--|--|-----------|--|--|

**All-cause mortality: events - HD**

|   |                       |                      |                      |             |                      |      |                    |                    |                                  |                                                         |                  |           |
|---|-----------------------|----------------------|----------------------|-------------|----------------------|------|--------------------|--------------------|----------------------------------|---------------------------------------------------------|------------------|-----------|
| 3 | observational studies | serious <sup>a</sup> | serious <sup>b</sup> | not serious | serious <sup>c</sup> | none | 6292/17965 (35.0%) | 8829/31790 (27.8%) | <b>RR 1.62</b><br>(0.97 to 2.69) | <b>172 more per 1,000</b><br>(from 8 fewer to 469 more) | ⊕○○○<br>VERY LOW | IMPORTANT |
|---|-----------------------|----------------------|----------------------|-------------|----------------------|------|--------------------|--------------------|----------------------------------|---------------------------------------------------------|------------------|-----------|

**All-cause mortality: time to event - HD**

|   |                       |                      |                      |             |             |      |  |  |                                  |                                                       |                  |               |
|---|-----------------------|----------------------|----------------------|-------------|-------------|------|--|--|----------------------------------|-------------------------------------------------------|------------------|---------------|
| 3 | observational studies | serious <sup>a</sup> | serious <sup>b</sup> | not serious | not serious | none |  |  | <b>HR 1.31</b><br>(1.05 to 1.63) | <b>1 fewer per 1,000</b><br>(from 2 fewer to 1 fewer) | ⊕○○○<br>VERY LOW | NOT IMPORTANT |
|---|-----------------------|----------------------|----------------------|-------------|-------------|------|--|--|----------------------------------|-------------------------------------------------------|------------------|---------------|

**All-cause mortality: 1mL/min/1.73m<sup>2</sup> GFR greater - HD or PD**

|   |                       |                      |             |             |             |                        |  |  |                                  |                                                       |             |           |
|---|-----------------------|----------------------|-------------|-------------|-------------|------------------------|--|--|----------------------------------|-------------------------------------------------------|-------------|-----------|
| 3 | observational studies | serious <sup>a</sup> | not serious | not serious | not serious | dose response gradient |  |  | <b>HR 0.99</b><br>(0.88 to 1.11) | <b>1 fewer per 1,000</b><br>(from 1 fewer to 1 fewer) | ⊕⊕○○<br>LOW | IMPORTANT |
|---|-----------------------|----------------------|-------------|-------------|-------------|------------------------|--|--|----------------------------------|-------------------------------------------------------|-------------|-----------|

**Hospitalization: average days - HD or PD**

|   |                   |                      |             |             |             |      |     |     |   |                                                  |                  |          |
|---|-------------------|----------------------|-------------|-------------|-------------|------|-----|-----|---|--------------------------------------------------|------------------|----------|
| 1 | randomized trials | serious <sup>a</sup> | not serious | not serious | not serious | none | 307 | 335 | - | <b>MD 8 higher</b><br>(1.2 lower to 17.2 higher) | ⊕⊕⊕○<br>MODERATE | CRITICAL |
|---|-------------------|----------------------|-------------|-------------|-------------|------|-----|-----|---|--------------------------------------------------|------------------|----------|

**Hospitalization: average contacts - HD or PD**

|   |                   |                        |             |             |             |      |     |     |   |                       |                  |          |
|---|-------------------|------------------------|-------------|-------------|-------------|------|-----|-----|---|-----------------------|------------------|----------|
| 1 | randomized trials | serious <sup>a,b</sup> | not serious | not serious | not serious | none | 307 | 335 | - | <b>MD 0</b><br>(0.93) | ⊕⊕⊕○<br>MODERATE | CRITICAL |
|---|-------------------|------------------------|-------------|-------------|-------------|------|-----|-----|---|-----------------------|------------------|----------|

|  |  |  |  |  |  |  |  |  |  |  |                             |  |  |
|--|--|--|--|--|--|--|--|--|--|--|-----------------------------|--|--|
|  |  |  |  |  |  |  |  |  |  |  | lower to<br>0.93<br>higher) |  |  |
|--|--|--|--|--|--|--|--|--|--|--|-----------------------------|--|--|

**Non-admitted hospital visits - HD or PD**

|   |                   |                             |             |             |             |      |     |     |   |                                              |             |           |
|---|-------------------|-----------------------------|-------------|-------------|-------------|------|-----|-----|---|----------------------------------------------|-------------|-----------|
| 1 | randomized trials | very serious <sup>a,b</sup> | not serious | not serious | not serious | none | 307 | 335 | - | MD 0<br>(2.73<br>lower to<br>2.73<br>higher) | ⊕⊕○○<br>LOW | IMPORTANT |
|---|-------------------|-----------------------------|-------------|-------------|-------------|------|-----|-----|---|----------------------------------------------|-------------|-----------|

**Visit to health care professional - HD or PD**

|   |                   |                             |             |             |             |      |     |     |   |                                              |             |           |
|---|-------------------|-----------------------------|-------------|-------------|-------------|------|-----|-----|---|----------------------------------------------|-------------|-----------|
| 1 | randomized trials | very serious <sup>a,b</sup> | not serious | not serious | not serious | none | 307 | 335 | - | MD 0<br>(2.73<br>lower to<br>2.73<br>higher) | ⊕⊕○○<br>LOW | IMPORTANT |
|---|-------------------|-----------------------------|-------------|-------------|-------------|------|-----|-----|---|----------------------------------------------|-------------|-----------|

**Composite cardiovascular events - HD or PD**

|   |                   |                      |             |             |                      |      |                    |                    |                              |                                                                    |             |          |
|---|-------------------|----------------------|-------------|-------------|----------------------|------|--------------------|--------------------|------------------------------|--------------------------------------------------------------------|-------------|----------|
| 1 | randomized trials | serious <sup>a</sup> | not serious | not serious | serious <sup>b</sup> | none | 139/404<br>(34.4%) | 127/424<br>(30.0%) | RR 1.15<br>(0.94 to<br>1.40) | 45 more<br>per<br>1,000<br>(from<br>18<br>fewer to<br>120<br>more) | ⊕⊕○○<br>LOW | CRITICAL |
|---|-------------------|----------------------|-------------|-------------|----------------------|------|--------------------|--------------------|------------------------------|--------------------------------------------------------------------|-------------|----------|

**Composite cardiovascular events - HD planned**

|   |                   |                        |             |             |                      |      |                   |                   |                              |                                                                    |             |           |
|---|-------------------|------------------------|-------------|-------------|----------------------|------|-------------------|-------------------|------------------------------|--------------------------------------------------------------------|-------------|-----------|
| 1 | randomized trials | serious <sup>a,b</sup> | not serious | not serious | serious <sup>c</sup> | none | 50/171<br>(29.2%) | 51/191<br>(26.7%) | RR 1.10<br>(0.79 to<br>1.52) | 27 more<br>per<br>1,000<br>(from<br>56<br>fewer to<br>139<br>more) | ⊕⊕○○<br>LOW | IMPORTANT |
|---|-------------------|------------------------|-------------|-------------|----------------------|------|-------------------|-------------------|------------------------------|--------------------------------------------------------------------|-------------|-----------|

**Composite Infectious events (death or hospitalization from infection) - HD or PD**

|   |            |                      |             |             |                      |      |         |         |         |    |      |           |
|---|------------|----------------------|-------------|-------------|----------------------|------|---------|---------|---------|----|------|-----------|
| 1 | randomized | serious <sup>a</sup> | not serious | not serious | serious <sup>c</sup> | none | 148/404 | 174/424 | RR 0.89 | 45 | ⊕⊕○○ | IMPORTANT |
|---|------------|----------------------|-------------|-------------|----------------------|------|---------|---------|---------|----|------|-----------|

|  |        |  |  |  |  |  |         |         |                |                                                    |     |  |
|--|--------|--|--|--|--|--|---------|---------|----------------|----------------------------------------------------|-----|--|
|  | trials |  |  |  |  |  | (36.6%) | (41.0%) | (0.75 to 1.06) | <b>fewer per 1,000</b> (from 103 fewer to 25 more) | LOW |  |
|--|--------|--|--|--|--|--|---------|---------|----------------|----------------------------------------------------|-----|--|

**Composite Infectious events (death or hospitalization from infection) - HD planned**

|   |                   |                        |             |             |                      |      |                |                |                               |                                                       |             |           |
|---|-------------------|------------------------|-------------|-------------|----------------------|------|----------------|----------------|-------------------------------|-------------------------------------------------------|-------------|-----------|
| 1 | randomized trials | serious <sup>a,b</sup> | not serious | not serious | serious <sup>c</sup> | none | 60/171 (35.1%) | 72/191 (37.7%) | <b>RR 0.93</b> (0.71 to 1.22) | <b>26 fewer per 1,000</b> (from 109 fewer to 83 more) | ⊕⊕○○<br>LOW | IMPORTANT |
|---|-------------------|------------------------|-------------|-------------|----------------------|------|----------------|----------------|-------------------------------|-------------------------------------------------------|-------------|-----------|

**Complications of dialysis: need for access revision - HD or PD**

|   |                   |                      |             |             |                      |      |                 |                 |                               |                                                     |             |           |
|---|-------------------|----------------------|-------------|-------------|----------------------|------|-----------------|-----------------|-------------------------------|-----------------------------------------------------|-------------|-----------|
| 1 | randomized trials | serious <sup>a</sup> | not serious | not serious | serious <sup>c</sup> | none | 145/404 (35.9%) | 147/424 (34.7%) | <b>RR 1.04</b> (0.86 to 1.25) | <b>14 more per 1,000</b> (from 49 fewer to 87 more) | ⊕⊕○○<br>LOW | IMPORTANT |
|---|-------------------|----------------------|-------------|-------------|----------------------|------|-----------------|-----------------|-------------------------------|-----------------------------------------------------|-------------|-----------|

**Complications of dialysis: need for access revision - HD planned**

|   |                   |                             |             |             |                      |      |                |                |                               |                                                      |                  |           |
|---|-------------------|-----------------------------|-------------|-------------|----------------------|------|----------------|----------------|-------------------------------|------------------------------------------------------|------------------|-----------|
| 1 | randomized trials | very serious <sup>a,b</sup> | not serious | not serious | serious <sup>c</sup> | none | 73/171 (42.7%) | 75/191 (39.3%) | <b>RR 1.09</b> (0.85 to 1.39) | <b>35 more per 1,000</b> (from 59 fewer to 153 more) | ⊕○○○<br>VERY LOW | IMPORTANT |
|---|-------------------|-----------------------------|-------------|-------------|----------------------|------|----------------|----------------|-------------------------------|------------------------------------------------------|------------------|-----------|

**Complication of dialysis: access site infection - HD or PD**

|   |                   |                      |             |             |                      |      |                   |                   |                                  |                                                        |             |           |
|---|-------------------|----------------------|-------------|-------------|----------------------|------|-------------------|-------------------|----------------------------------|--------------------------------------------------------|-------------|-----------|
| 1 | randomized trials | serious <sup>a</sup> | not serious | not serious | serious <sup>c</sup> | none | 47/404<br>(11.6%) | 50/424<br>(11.8%) | <b>RR 0.99</b><br>(0.68 to 1.43) | <b>1 fewer per 1,000</b><br>(from 38 fewer to 51 more) | ⊕⊕○○<br>LOW | IMPORTANT |
|---|-------------------|----------------------|-------------|-------------|----------------------|------|-------------------|-------------------|----------------------------------|--------------------------------------------------------|-------------|-----------|

**Complication of dialysis: access site infection - HD planned**

|   |                   |                        |             |             |                      |      |                   |                   |                                  |                                                         |             |           |
|---|-------------------|------------------------|-------------|-------------|----------------------|------|-------------------|-------------------|----------------------------------|---------------------------------------------------------|-------------|-----------|
| 1 | randomized trials | serious <sup>a,b</sup> | not serious | not serious | serious <sup>c</sup> | none | 20/171<br>(11.7%) | 27/191<br>(14.1%) | <b>RR 0.83</b><br>(0.48 to 1.42) | <b>24 fewer per 1,000</b><br>(from 74 fewer to 59 more) | ⊕⊕○○<br>LOW | IMPORTANT |
|---|-------------------|------------------------|-------------|-------------|----------------------|------|-------------------|-------------------|----------------------------------|---------------------------------------------------------|-------------|-----------|

**Complication of dialysis: serious fluid or electrolytes disorder - HD or PD**

|   |                   |                      |             |             |             |      |                    |                    |                                  |                                                          |                  |           |
|---|-------------------|----------------------|-------------|-------------|-------------|------|--------------------|--------------------|----------------------------------|----------------------------------------------------------|------------------|-----------|
| 1 | randomized trials | serious <sup>a</sup> | not serious | not serious | not serious | none | 146/404<br>(36.1%) | 175/424<br>(41.3%) | <b>RR 0.88</b><br>(0.74 to 1.04) | <b>50 fewer per 1,000</b><br>(from 107 fewer to 17 more) | ⊕⊕⊕○<br>MODERATE | IMPORTANT |
|---|-------------------|----------------------|-------------|-------------|-------------|------|--------------------|--------------------|----------------------------------|----------------------------------------------------------|------------------|-----------|

**Complication of dialysis: serious fluid or electrolytes disorder - HD planned**

|   |                   |                        |             |             |             |      |                   |                   |                                  |                                                            |                  |           |
|---|-------------------|------------------------|-------------|-------------|-------------|------|-------------------|-------------------|----------------------------------|------------------------------------------------------------|------------------|-----------|
| 1 | randomized trials | serious <sup>a,b</sup> | not serious | not serious | not serious | none | 44/171<br>(25.7%) | 73/191<br>(38.2%) | <b>RR 0.67</b><br>(0.49 to 0.92) | <b>126 fewer per 1,000</b><br>(from 195 fewer to 31 fewer) | ⊕⊕⊕○<br>MODERATE | IMPORTANT |
|---|-------------------|------------------------|-------------|-------------|-------------|------|-------------------|-------------------|----------------------------------|------------------------------------------------------------|------------------|-----------|

**Complication of dialysis: placement of temporary dialysis catheter - HD or PD**

|   |                   |                      |             |             |             |      |                 |                 |                                  |                                                        |                  |           |
|---|-------------------|----------------------|-------------|-------------|-------------|------|-----------------|-----------------|----------------------------------|--------------------------------------------------------|------------------|-----------|
| 1 | randomized trials | serious <sup>a</sup> | not serious | not serious | not serious | none | 118/404 (29.2%) | 124/424 (29.2%) | <b>RR 1.00</b><br>(0.81 to 1.23) | <b>0 fewer per 1,000</b><br>(from 56 fewer to 67 more) | ⊕⊕⊕○<br>MODERATE | IMPORTANT |
|---|-------------------|----------------------|-------------|-------------|-------------|------|-----------------|-----------------|----------------------------------|--------------------------------------------------------|------------------|-----------|

**Complication of dialysis: placement of temporary dialysis catheter - HD planned**

|   |                   |                        |             |             |                      |      |                |                |                                  |                                                         |             |           |
|---|-------------------|------------------------|-------------|-------------|----------------------|------|----------------|----------------|----------------------------------|---------------------------------------------------------|-------------|-----------|
| 1 | randomized trials | serious <sup>a,b</sup> | not serious | not serious | serious <sup>c</sup> | none | 39/171 (22.8%) | 41/191 (21.5%) | <b>RR 1.06</b><br>(0.72 to 1.56) | <b>13 more per 1,000</b><br>(from 60 fewer to 120 more) | ⊕⊕○○<br>LOW | IMPORTANT |
|---|-------------------|------------------------|-------------|-------------|----------------------|------|----------------|----------------|----------------------------------|---------------------------------------------------------|-------------|-----------|

**Echocardiographic endpoint: Left ventricular ejection fraction (%)**

|   |                   |                             |             |             |                      |      |    |    |   |                                            |                  |           |
|---|-------------------|-----------------------------|-------------|-------------|----------------------|------|----|----|---|--------------------------------------------|------------------|-----------|
| 1 | randomized trials | very serious <sup>a,b</sup> | not serious | not serious | serious <sup>c</sup> | none | 91 | 91 | - | <b>MD 0</b><br>(5.23 lower to 5.23 higher) | ⊕○○○<br>VERY LOW | IMPORTANT |
|---|-------------------|-----------------------------|-------------|-------------|----------------------|------|----|----|---|--------------------------------------------|------------------|-----------|

**Echocardiographic endpoint: Left ventricular mass index (g/m<sup>2</sup>)**

|   |                   |                             |             |             |                      |      |    |    |   |                                                      |                  |           |
|---|-------------------|-----------------------------|-------------|-------------|----------------------|------|----|----|---|------------------------------------------------------|------------------|-----------|
| 1 | randomized trials | very serious <sup>a,b</sup> | not serious | not serious | serious <sup>c</sup> | none | 91 | 91 | - | <b>MD 11.4 lower</b><br>(23.09 lower to 0.29 higher) | ⊕○○○<br>VERY LOW | IMPORTANT |
|---|-------------------|-----------------------------|-------------|-------------|----------------------|------|----|----|---|------------------------------------------------------|------------------|-----------|

**Echocardiographic endpoint: Left atrial volume index (mL/m<sup>2</sup>)**

|   |                   |                             |             |             |                      |      |    |    |   |                     |                  |           |
|---|-------------------|-----------------------------|-------------|-------------|----------------------|------|----|----|---|---------------------|------------------|-----------|
| 1 | randomized trials | very serious <sup>a,b</sup> | not serious | not serious | serious <sup>c</sup> | none | 91 | 91 | - | <b>MD 0.6 lower</b> | ⊕○○○<br>VERY LOW | IMPORTANT |
|---|-------------------|-----------------------------|-------------|-------------|----------------------|------|----|----|---|---------------------|------------------|-----------|

|  |  |  |  |  |  |  |  |  |  |                             |  |  |
|--|--|--|--|--|--|--|--|--|--|-----------------------------|--|--|
|  |  |  |  |  |  |  |  |  |  | (7.03 lower to 5.83 higher) |  |  |
|--|--|--|--|--|--|--|--|--|--|-----------------------------|--|--|

CI: Confidence interval; MD: Mean difference

**Explanations**

a. High risk of bias in blinding, b. High risk of bias in the selection, c. Confidence interval crossed minimally important difference

**Key question 1.2.**

Not applicable

**Key question 2.1.**

Clinical evidence profiles: clinical outcomes of <4 hours vs. ≥4 hours dialysis time per sessions

| Certainty assessment |              |              |               |              |             |                      | № of patients      |                    | Effect            |                   | Certainty | Importance |
|----------------------|--------------|--------------|---------------|--------------|-------------|----------------------|--------------------|--------------------|-------------------|-------------------|-----------|------------|
| № of studies         | Study design | Risk of bias | Inconsistency | Indirectness | Imprecision | Other considerations | <4hour per session | 4hours per session | Relative (95% CI) | Absolute (95% CI) |           |            |

**Overall Mortality\_RCT**

|   |                   |             |             |             |         |      |                  |                  |                               |                                                    |               |          |
|---|-------------------|-------------|-------------|-------------|---------|------|------------------|------------------|-------------------------------|----------------------------------------------------|---------------|----------|
| 2 | randomized trials | not serious | not serious | not serious | serious | none | 566/2610 (21.7%) | 427/2011 (21.2%) | <b>OR 1.02</b> (0.88 to 1.18) | <b>3 more per 1,000</b> (from 21 fewer to 29 more) | ⊕⊕⊕○ MODERATE | CRITICAL |
|---|-------------------|-------------|-------------|-------------|---------|------|------------------|------------------|-------------------------------|----------------------------------------------------|---------------|----------|

**Hospitalization**

|   |                   |             |             |             |             |                                     |                   |                   |                               |                                                      |               |          |
|---|-------------------|-------------|-------------|-------------|-------------|-------------------------------------|-------------------|-------------------|-------------------------------|------------------------------------------------------|---------------|----------|
| 2 | randomized trials | not serious | not serious | not serious | not serious | publication bias strongly suspected | 1831/2610 (70.2%) | 1387/2011 (69.0%) | <b>OR 1.38</b> (0.67 to 2.87) | <b>64 more per 1,000</b> (from 91 fewer to 175 more) | ⊕⊕⊕○ MODERATE | CRITICAL |
|---|-------------------|-------------|-------------|-------------|-------------|-------------------------------------|-------------------|-------------------|-------------------------------|------------------------------------------------------|---------------|----------|

**Overall Mortality: Time to event**

|   |                       |             |             |             |             |      |     |     |                                  |                                                       |             |           |
|---|-----------------------|-------------|-------------|-------------|-------------|------|-----|-----|----------------------------------|-------------------------------------------------------|-------------|-----------|
| 4 | observational studies | not serious | not serious | not serious | not serious | none | -/0 | -/0 | <b>OR 1.34</b><br>(1.15 to 1.55) | <b>1 fewer per 1,000</b><br>(from 2 fewer to 1 fewer) | ⊕⊕○○<br>LOW | IMPORTANT |
|---|-----------------------|-------------|-------------|-------------|-------------|------|-----|-----|----------------------------------|-------------------------------------------------------|-------------|-----------|

**Overall Mortality: 2/week vs 3/week**

|   |                       |             |             |             |             |      |     |     |                               |                                        |             |           |
|---|-----------------------|-------------|-------------|-------------|-------------|------|-----|-----|-------------------------------|----------------------------------------|-------------|-----------|
| 3 | observational studies | not serious | not serious | not serious | not serious | none | -/0 | -/0 | <b>2.02</b><br>(1.01 to 4.07) | <b>-- per 1,000</b><br>(from -- to --) | ⊕⊕○○<br>LOW | IMPORTANT |
|---|-----------------------|-------------|-------------|-------------|-------------|------|-----|-----|-------------------------------|----------------------------------------|-------------|-----------|

**Key question 2.2.**

**Clinical evidence profiles: high-dose dialysis versus low-dose dialysis for ESRD patients**

| Certainty assessment |              |              |               |              |             |                      | № of patients |          | Effect            |                   | Certainty | Importance |
|----------------------|--------------|--------------|---------------|--------------|-------------|----------------------|---------------|----------|-------------------|-------------------|-----------|------------|
| № of studies         | Study design | Risk of bias | Inconsistency | Indirectness | Imprecision | Other considerations | High dose     | Low dose | Relative (95% CI) | Absolute (95% CI) |           |            |

**Mortality**

|    |                       |             |             |                      |             |                        |                                                                                                                                                                                                                                                                                                                                                          |  |             |           |
|----|-----------------------|-------------|-------------|----------------------|-------------|------------------------|----------------------------------------------------------------------------------------------------------------------------------------------------------------------------------------------------------------------------------------------------------------------------------------------------------------------------------------------------------|--|-------------|-----------|
| 11 | observational studies | not serious | not serious | serious <sup>a</sup> | not serious | dose response gradient | In total, 11 observational studies consistently reported that low dialysis dose, which was evaluated using spKt/V, eKt/V, or URR, was associated increased mortality in adult ESRD patients maintaining hemodialysis. However, the relationship between high-dose dialysis, eKt/V>1.4 or spKt/V>1.6, and mortality showed heterogeneity between studies. |  | ⊕⊕○○<br>LOW | IMPORTANT |
|----|-----------------------|-------------|-------------|----------------------|-------------|------------------------|----------------------------------------------------------------------------------------------------------------------------------------------------------------------------------------------------------------------------------------------------------------------------------------------------------------------------------------------------------|--|-------------|-----------|

**Mortality**

|   |                   |             |             |             |                      |      |                    |                    |                                  |                                                        |                  |          |
|---|-------------------|-------------|-------------|-------------|----------------------|------|--------------------|--------------------|----------------------------------|--------------------------------------------------------|------------------|----------|
| 1 | randomized trials | not serious | not serious | not serious | serious <sup>b</sup> | none | 431/920<br>(46.8%) | 440/926<br>(47.5%) | <b>OR 0.97</b><br>(0.81 to 1.17) | <b>8 fewer per 1,000</b><br>(from 52 fewer to 39 more) | ⊕⊕⊕○<br>MODERATE | CRITICAL |
|---|-------------------|-------------|-------------|-------------|----------------------|------|--------------------|--------------------|----------------------------------|--------------------------------------------------------|------------------|----------|



**CI:** Confidence interval; **OR:** Odds ratio

**Explanations**

- a. Some studies presented relationship between dialysis dose and mortality only in subgroups according to body mass index or sex, not for all cohort patients.
- b. There was a high risk of imprecision because only one randomized controlled trial was included for this issue.

### Key question 3.1.

Clinical evidence profiles: high-flux compared to low-flux membranes for end-stage kidney disease

| Certainty assessment               |                   |              |               |              |             |                      | № of patients    |                    | Effect                           |                                                          | Certainty    | Importance |
|------------------------------------|-------------------|--------------|---------------|--------------|-------------|----------------------|------------------|--------------------|----------------------------------|----------------------------------------------------------|--------------|------------|
| № of studies                       | Study design      | Risk of bias | Inconsistency | Indirectness | Imprecision | Other considerations | High-flux        | low-flux membranes | Relative (95% CI)                | Absolute (95% CI)                                        |              |            |
| <b>All-cause mortality</b>         |                   |              |               |              |             |                      |                  |                    |                                  |                                                          |              |            |
| 10                                 | randomized trials | not serious  | not serious   | not serious  | not serious | none                 | 599/1789 (33.5%) | 662/1860 (35.6%)   | <b>RR 0.87</b><br>(0.76 to 0.99) | <b>46 fewer per 1,000</b><br>(from 85 fewer to 4 fewer)  | ⊕⊕⊕⊕<br>HIGH | CRITICAL   |
| <b>Cardiovascular mortality</b>    |                   |              |               |              |             |                      |                  |                    |                                  |                                                          |              |            |
| 5                                  | randomized trials | not serious  | not serious   | not serious  | not serious | none                 | 234/1644 (14.2%) | 288/1652 (17.4%)   | <b>RR 0.81</b><br>(0.70 to 0.95) | <b>33 fewer per 1,000</b><br>(from 52 fewer to 9 fewer)  | ⊕⊕⊕⊕<br>HIGH | CRITICAL   |
| <b>Hospitalization - Any cause</b> |                   |              |               |              |             |                      |                  |                    |                                  |                                                          |              |            |
| 2                                  | randomized trials |              |               |              |             | none                 | 20/64 (31.3%)    | 18/60 (30.0%)      | <b>RR 0.80</b><br>(0.53 to 1.22) | <b>60 fewer per 1,000</b><br>(from 141 fewer to 66 more) | -            | IMPORTANT  |

Predialysis β-2 microglobulin

|   |                   |  |  |  |  |      |      |      |   |                                                    |   |           |
|---|-------------------|--|--|--|--|------|------|------|---|----------------------------------------------------|---|-----------|
| 6 | randomized trials |  |  |  |  | none | 1371 | 1378 | - | MD <b>9.9 lower</b><br>(12.14 lower to 7.65 lower) | - | IMPORTANT |
|---|-------------------|--|--|--|--|------|------|------|---|----------------------------------------------------|---|-----------|

#### Equilibrated Kt/Vurea

|   |                   |  |  |  |  |      |      |      |   |                                            |   |           |
|---|-------------------|--|--|--|--|------|------|------|---|--------------------------------------------|---|-----------|
| 4 | randomized trials |  |  |  |  | none | 1332 | 1340 | - | MD <b>0</b><br>(0.02 lower to 0.01 higher) | - | IMPORTANT |
|---|-------------------|--|--|--|--|------|------|------|---|--------------------------------------------|---|-----------|

CI: Confidence interval; RR: Risk ratio; MD: Mean difference

### Key question 3.2.

#### Online hemodiafiltration compared to High-flux hemodialysis for outcomes

| Certainty assessment      |              |              |               |              |             |                      | N <sup>o</sup> of patients |                        | Effect            |                   | Certainty | Importance |
|---------------------------|--------------|--------------|---------------|--------------|-------------|----------------------|----------------------------|------------------------|-------------------|-------------------|-----------|------------|
| N <sup>o</sup> of studies | Study design | Risk of bias | Inconsistency | Indirectness | Imprecision | Other considerations | Online hemodiafiltration   | High-flux hemodialysis | Relative (95% CI) | Absolute (95% CI) |           |            |

#### Overall mortality

|   |                   |                        |             |             |             |      |                |                 |                                  |                                                         |                  |          |
|---|-------------------|------------------------|-------------|-------------|-------------|------|----------------|-----------------|----------------------------------|---------------------------------------------------------|------------------|----------|
| 2 | randomized trials | serious <sup>1,a</sup> | not serious | not serious | not serious | none | 88/581 (15.1%) | 108/582 (18.6%) | <b>OR 0.78</b><br>(0.57 to 1.07) | <b>35 fewer per 1,000</b><br>(from 71 fewer to 10 more) | ⊕⊕⊕○<br>MODERATE | CRITICAL |
|---|-------------------|------------------------|-------------|-------------|-------------|------|----------------|-----------------|----------------------------------|---------------------------------------------------------|------------------|----------|

#### Hospitalization rate

| Certainty assessment |                   |                      |                           |              |             |                      | № of patients            |                        | Effect                           |                                                       | Certainty        | Importance |
|----------------------|-------------------|----------------------|---------------------------|--------------|-------------|----------------------|--------------------------|------------------------|----------------------------------|-------------------------------------------------------|------------------|------------|
| № of studies         | Study design      | Risk of bias         | Inconsistency             | Indirectness | Imprecision | Other considerations | Online hemodiafiltration | High-flux hemodialysis | Relative (95% CI)                | Absolute (95% CI)                                     |                  |            |
| 2                    | randomized trials | serious <sup>a</sup> | very serious <sup>b</sup> | not serious  | not serious | none                 | 456/1313 (34.7%)         | 449/1311 (34.2%)       | <b>RR 1.01</b><br>(0.93 to 1.10) | <b>3 more per 1,000</b><br>(from 24 fewer to 34 more) | ⊕○○○<br>VERY LOW | IMPORTANT  |

CI: Confidence interval; OR: Odds ratio; RR: Risk ratio

## Key question 4.1.

Clinical evidence profiles: clinical outcomes of LMWH vs. UFH of hemodialysis

| Certainty assessment |              |              |               |              |             |                      | № of patients                       |                              | Effect            |                   | Certainty | Importance |
|----------------------|--------------|--------------|---------------|--------------|-------------|----------------------|-------------------------------------|------------------------------|-------------------|-------------------|-----------|------------|
| № of studies         | Study design | Risk of bias | Inconsistency | Indirectness | Imprecision | Other considerations | low molecular weight heparin (LMWH) | unfractionated heparin (UFH) | Relative (95% CI) | Absolute (95% CI) |           |            |

Outcome: bleeding complications

|   |                   |                      |             |             |             |      |               |                |                                  |                                                          |                  |          |
|---|-------------------|----------------------|-------------|-------------|-------------|------|---------------|----------------|----------------------------------|----------------------------------------------------------|------------------|----------|
| 6 | randomized trials | serious <sup>a</sup> | not serious | not serious | not serious | none | 21/219 (9.6%) | 27/219 (12.3%) | <b>RR 0.74</b><br>(0.24 to 2.31) | <b>32 fewer per 1,000</b><br>(from 94 fewer to 162 more) | ⊕⊕⊕○<br>MODERATE | CRITICAL |
|---|-------------------|----------------------|-------------|-------------|-------------|------|---------------|----------------|----------------------------------|----------------------------------------------------------|------------------|----------|

Outcome: circuit thrombosis

| Certainty assessment |                   |                      |                      |              |             |                      | № of patients                       |                              | Effect                           |                                                       | Certainty   | Importance |
|----------------------|-------------------|----------------------|----------------------|--------------|-------------|----------------------|-------------------------------------|------------------------------|----------------------------------|-------------------------------------------------------|-------------|------------|
| № of studies         | Study design      | Risk of bias         | Inconsistency        | Indirectness | Imprecision | Other considerations | low molecular weight heparin (LMWH) | unfractionated heparin (UFH) | Relative (95% CI)                | Absolute (95% CI)                                     |             |            |
| 3                    | randomized trials | serious <sup>a</sup> | serious <sup>b</sup> | not serious  | not serious | none                 | 129/6534 (2.0%)                     | 125/6720 (1.9%)              | <b>RR 0.99</b><br>(0.56 to 1.77) | <b>0 fewer per 1,000</b><br>(from 8 fewer to 14 more) | ⊕⊕○○<br>LOW | CRITICAL   |

**CI:** Confidence interval; **RR:** Risk ratio

**Explanations**

a. no description of randomization process and blinding of participants and/or researchers

b. significant heterogeneity within studies

**Key question 4.2.**

Not applicable

**Key question 5.1.**

**Clinical evidence profiles: increased inter-dialytic weight gain (IDWG) of reference value as risk factor for mortality**

| Certainty assessment |              |              |               |              |             |                      | Certainty | Importance |
|----------------------|--------------|--------------|---------------|--------------|-------------|----------------------|-----------|------------|
| № of studies         | Study design | Risk of bias | Inconsistency | Indirectness | Imprecision | Other considerations |           |            |

**IDWG: Prospective observational study**

| Certainty assessment |                                 |              |               |              |             |                      | Certainty        | Importance |
|----------------------|---------------------------------|--------------|---------------|--------------|-------------|----------------------|------------------|------------|
| Nº of studies        | Study design                    | Risk of bias | Inconsistency | Indirectness | Imprecision | Other considerations |                  |            |
| 7                    | Prospective observational study | serious      | not serious   | not serious  | not serious | none                 | ⊕⊕⊕○<br>MODERATE | CRITICAL   |

**IDWG: Retrospective study**

|   |                     |         |             |             |         |      |             |          |
|---|---------------------|---------|-------------|-------------|---------|------|-------------|----------|
| 5 | Retrospective study | serious | not serious | not serious | serious | none | ⊕⊕○○<br>LOW | CRITICAL |
|---|---------------------|---------|-------------|-------------|---------|------|-------------|----------|

**Key question 5.2.**

**Clinical evidence profiles: clinical outcomes of low vs. conventional dialysate sodium levels for chronic hemodialysis**

| Certainty assessment |                   |              |               |              |             |                      | Nº of patients |         | Effect            |                                                    | Certainty        | Importance |
|----------------------|-------------------|--------------|---------------|--------------|-------------|----------------------|----------------|---------|-------------------|----------------------------------------------------|------------------|------------|
| Nº of studies        | Study design      | Risk of bias | Inconsistency | Indirectness | Imprecision | Other considerations | Low dialysate  | placebo | Relative (95% CI) | Absolute (95% CI)                                  |                  |            |
| 3                    | randomized trials | not serious  | not serious   | not serious  | serious     | none                 | 84             | 85      | -                 | MD <b>0.37 higher</b> (0.11 higher to 0.62 higher) | ⊕⊕⊕○<br>MODERATE |            |

**Interdialytic weight gain**

|   |                       |             |             |             |             |                                     |    |    |   |                                                      |                  |  |
|---|-----------------------|-------------|-------------|-------------|-------------|-------------------------------------|----|----|---|------------------------------------------------------|------------------|--|
| 4 | observational studies | not serious | not serious | not serious | not serious | publication bias strongly suspected | 96 | 96 | - | MD <b>0.6 higher</b><br>(0.34 higher to 0.86 higher) | ⊕○○○<br>VERY LOW |  |
|---|-----------------------|-------------|-------------|-------------|-------------|-------------------------------------|----|----|---|------------------------------------------------------|------------------|--|

**Predialysis BP**

|   |                   |             |             |             |         |                                     |    |    |   |                                                        |             |  |
|---|-------------------|-------------|-------------|-------------|---------|-------------------------------------|----|----|---|--------------------------------------------------------|-------------|--|
| 1 | randomized trials | not serious | not serious | not serious | serious | publication bias strongly suspected | 18 | 20 | - | MD <b>12.02 higher</b><br>(0.74 lower to 24.78 higher) | ⊕⊕○○<br>LOW |  |
|---|-------------------|-------------|-------------|-------------|---------|-------------------------------------|----|----|---|--------------------------------------------------------|-------------|--|

**Predialysis BP**

|   |                       |             |             |             |             |                                     |    |    |   |                                                        |                  |  |
|---|-----------------------|-------------|-------------|-------------|-------------|-------------------------------------|----|----|---|--------------------------------------------------------|------------------|--|
| 3 | observational studies | not serious | not serious | not serious | not serious | publication bias strongly suspected | 37 | 37 | - | MD <b>15.6 higher</b><br>(4.52 higher to 26.69 higher) | ⊕○○○<br>VERY LOW |  |
|---|-----------------------|-------------|-------------|-------------|-------------|-------------------------------------|----|----|---|--------------------------------------------------------|------------------|--|

**Antihypertensive medication**

|   |                   |             |             |             |         |                                     |    |    |   |                                                      |             |  |
|---|-------------------|-------------|-------------|-------------|---------|-------------------------------------|----|----|---|------------------------------------------------------|-------------|--|
| 1 | randomized trials | not serious | not serious | not serious | serious | publication bias strongly suspected | 29 | 28 | - | MD <b>1.5 higher</b><br>(0.23 higher to 2.77 higher) | ⊕⊕○○<br>LOW |  |
|---|-------------------|-------------|-------------|-------------|---------|-------------------------------------|----|----|---|------------------------------------------------------|-------------|--|

**Echocardiographic parameter - Posterior wall thickness (mm)**

|   |                       |             |             |             |             |                                     |    |    |   |                                                      |                  |  |
|---|-----------------------|-------------|-------------|-------------|-------------|-------------------------------------|----|----|---|------------------------------------------------------|------------------|--|
| 2 | observational studies | not serious | not serious | not serious | not serious | publication bias strongly suspected | 67 | 67 | - | MD <b>0.14 higher</b><br>(0.29 lower to 0.57 higher) | ⊕○○○<br>VERY LOW |  |
|---|-----------------------|-------------|-------------|-------------|-------------|-------------------------------------|----|----|---|------------------------------------------------------|------------------|--|

**Echocardiographic parameter - LV ejection fraction (%)**

|   |                       |             |             |             |             |                                     |    |    |   |                                                     |                  |  |
|---|-----------------------|-------------|-------------|-------------|-------------|-------------------------------------|----|----|---|-----------------------------------------------------|------------------|--|
| 2 | observational studies | not serious | not serious | not serious | not serious | publication bias strongly suspected | 67 | 67 | - | MD <b>1.32 lower</b><br>(4.55 lower to 1.92 higher) | ⊕○○○<br>VERY LOW |  |
|---|-----------------------|-------------|-------------|-------------|-------------|-------------------------------------|----|----|---|-----------------------------------------------------|------------------|--|

**Echocardiographic parameter - pulmonary artery pressure (mmHg)**

|   |                       |             |             |             |             |                                     |    |    |   |                                                        |                  |  |
|---|-----------------------|-------------|-------------|-------------|-------------|-------------------------------------|----|----|---|--------------------------------------------------------|------------------|--|
| 2 | observational studies | not serious | not serious | not serious | not serious | publication bias strongly suspected | 67 | 67 | - | MD <b>7.14 higher</b><br>(2.67 higher to 11.61 higher) | ⊕○○○<br>VERY LOW |  |
|---|-----------------------|-------------|-------------|-------------|-------------|-------------------------------------|----|----|---|--------------------------------------------------------|------------------|--|

**Echocardiographic parameter - inferior vena cava diameter (mm)**

|   |                       |             |             |             |             |                                     |    |    |   |                                                       |                  |  |
|---|-----------------------|-------------|-------------|-------------|-------------|-------------------------------------|----|----|---|-------------------------------------------------------|------------------|--|
| 2 | observational studies | not serious | not serious | not serious | not serious | publication bias strongly suspected | 67 | 67 | - | MD <b>2.17 higher</b><br>(1.62 higher to 2.72 higher) | ⊕○○○<br>VERY LOW |  |
|---|-----------------------|-------------|-------------|-------------|-------------|-------------------------------------|----|----|---|-------------------------------------------------------|------------------|--|

**Predialysis serum [Na<sup>+</sup>]**

|   |                       |             |             |             |             |                                     |    |    |   |                                                   |                  |  |
|---|-----------------------|-------------|-------------|-------------|-------------|-------------------------------------|----|----|---|---------------------------------------------------|------------------|--|
| 2 | observational studies | not serious | not serious | not serious | not serious | publication bias strongly suspected | 29 | 29 | - | MD <b>0.4 higher</b><br>(0.5 lower to 1.3 higher) | ⊕○○○<br>VERY LOW |  |
|---|-----------------------|-------------|-------------|-------------|-------------|-------------------------------------|----|----|---|---------------------------------------------------|------------------|--|

**Key question 6.1.**

Not applicable

**Key question 6.2.**

Clinical evidence profiles: cool dialysate compared to Standard dialysate for Hemodialysis patients



| Certainty assessment |              |              |               |              |             |                      | Impact | Certainty | Importance |
|----------------------|--------------|--------------|---------------|--------------|-------------|----------------------|--------|-----------|------------|
| Nº of studies        | Study design | Risk of bias | Inconsistency | Indirectness | Imprecision | Other considerations |        |           |            |

**Intradialytic hypotension: RCT**

|   |                   |         |             |             |             |      |                                                                                                                           |                  |          |
|---|-------------------|---------|-------------|-------------|-------------|------|---------------------------------------------------------------------------------------------------------------------------|------------------|----------|
| 4 | Randomized trials | serious | not serious | not serious | not serious | none | In total 4 randomized crossover trial, cool dialysate reduced intradialytic hypotension compared with standard dialysate. | ⊕⊕⊕○<br>MODERATE | CRITICAL |
|---|-------------------|---------|-------------|-------------|-------------|------|---------------------------------------------------------------------------------------------------------------------------|------------------|----------|

**Intradialytic hypotension: non-RCT**

|   |                       |         |             |             |             |      |                                                                                                                      |                  |          |
|---|-----------------------|---------|-------------|-------------|-------------|------|----------------------------------------------------------------------------------------------------------------------|------------------|----------|
| 2 | Observational studies | serious | not serious | not serious | not serious | none | In total 2 observational studies, cool dialysate reduced intradialytic hypotension compared with standard dialysate. | ⊕⊕⊕○<br>MODERATE | CRITICAL |
|---|-----------------------|---------|-------------|-------------|-------------|------|----------------------------------------------------------------------------------------------------------------------|------------------|----------|

**Key question 7.1.**

Not applicable

**Key question 8.1.**

**Clinical evidence profiles: dialysis vs. conservative treatment for elderly ESRD patients.**

| Certainty assessment |              |              |               |              |             |                      | Nº of patients |                        | Effect            |                   | Certainty | Importance |
|----------------------|--------------|--------------|---------------|--------------|-------------|----------------------|----------------|------------------------|-------------------|-------------------|-----------|------------|
| Nº of studies        | Study design | Risk of bias | Inconsistency | Indirectness | Imprecision | Other considerations | Dialysis       | conservative treatment | Relative (95% CI) | Absolute (95% CI) |           |            |

**Mortality**

|    |                       |             |             |         |             |      |                   |                   |                                  |                                                             |                  |          |
|----|-----------------------|-------------|-------------|---------|-------------|------|-------------------|-------------------|----------------------------------|-------------------------------------------------------------|------------------|----------|
| 11 | observational studies | not serious | not serious | serious | not serious | none | 1401/3274 (42.8%) | 1092/1735 (62.9%) | <b>OR 0.42</b><br>(0.37 to 0.47) | <b>213 fewer per 1,000</b><br>(from 244 fewer to 186 fewer) | ⊕⊕⊕○<br>MODERATE | CRITICAL |
|----|-----------------------|-------------|-------------|---------|-------------|------|-------------------|-------------------|----------------------------------|-------------------------------------------------------------|------------------|----------|

**Prospective cohort data only**

|   |                       |             |             |         |             |      |                 |                 |                                  |                                                             |                  |          |
|---|-----------------------|-------------|-------------|---------|-------------|------|-----------------|-----------------|----------------------------------|-------------------------------------------------------------|------------------|----------|
| 4 | observational studies | not serious | not serious | serious | not serious | none | 231/761 (30.4%) | 191/321 (59.5%) | <b>OR 0.20</b><br>(0.15 to 0.28) | <b>368 fewer per 1,000</b><br>(from 414 fewer to 304 fewer) | ⊕⊕⊕○<br>MODERATE | CRITICAL |
|---|-----------------------|-------------|-------------|---------|-------------|------|-----------------|-----------------|----------------------------------|-------------------------------------------------------------|------------------|----------|

**Retrospective data only**

|   |                       |             |             |         |             |      |                   |                  |                                  |                                                             |                  |           |
|---|-----------------------|-------------|-------------|---------|-------------|------|-------------------|------------------|----------------------------------|-------------------------------------------------------------|------------------|-----------|
| 7 | observational studies | not serious | not serious | serious | not serious | none | 1170/2513 (46.6%) | 901/1414 (63.7%) | <b>OR 0.48</b><br>(0.42 to 0.56) | <b>180 fewer per 1,000</b><br>(from 213 fewer to 141 fewer) | ⊕⊕⊕○<br>MODERATE | IMPORTANT |
|---|-----------------------|-------------|-------------|---------|-------------|------|-------------------|------------------|----------------------------------|-------------------------------------------------------------|------------------|-----------|

**CI:** Confidence interval; **OR:** Odds ratio

**Key question 8.2.**

Not applicable
