# Supplementary material for: Korean Society of Nephrology 2021 Clinical Practice Guideline for Optimal Hemodialysis Treatment
Source: PubMed Central journal article supplement — Kidney Res Clin Pract. 2021 Dec 10;40(Suppl 1):S1–S37. doi: 10.23876/j.krcp.21.600 (PMC8694695; doi:10.23876/j.krcp.21.600), 2021-12-10
Supplement: j-krcp-21-600suppl9.pdf [file j-krcp-21-600suppl9.pdf]

## Supplement 9| Forest Plots

### Key question 1.1.

#### 1.1. All-cause mortality: RCTs

##### 1.1.1. All-cause mortality: events

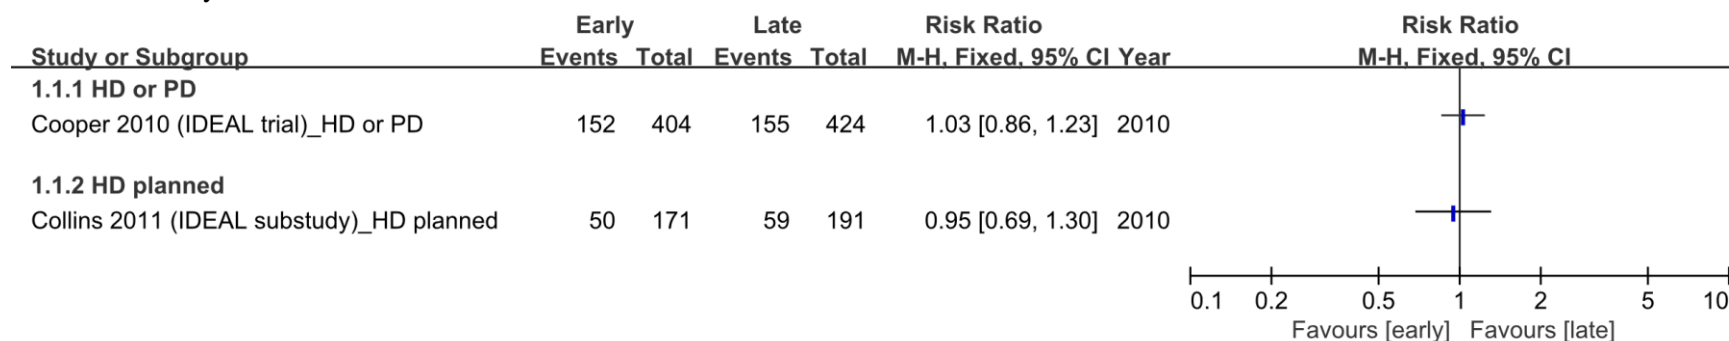

##### 1.1.2. All-cause mortality: time to event

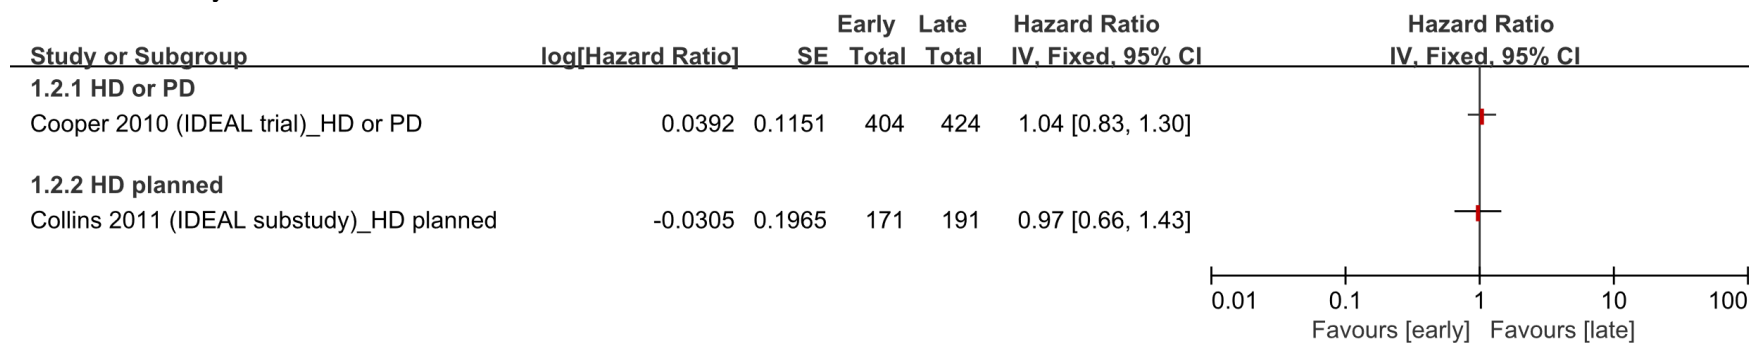

#### 1.2. All-cause mortality: non-RCTs

##### 1.2.1. All-cause mortality: events (HD)

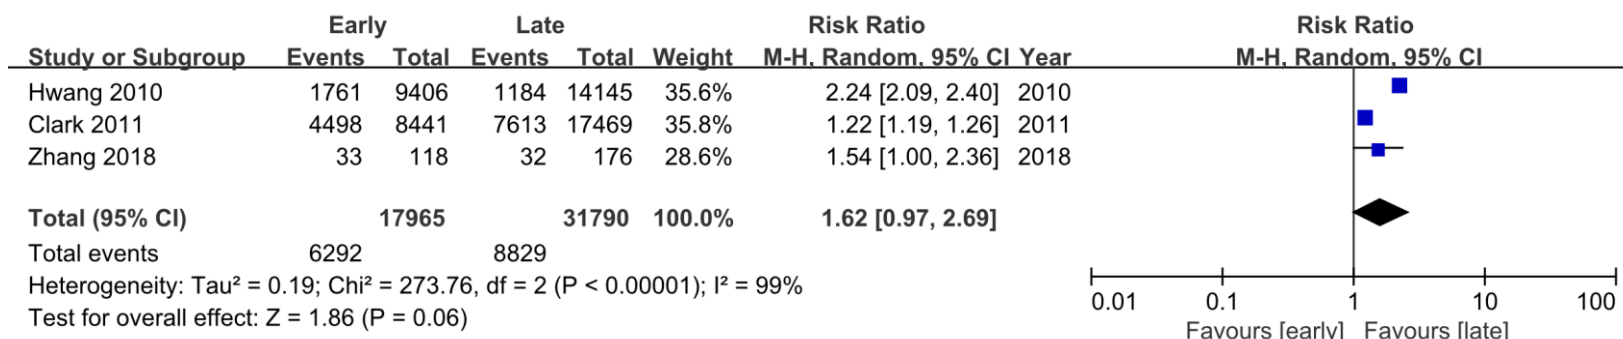

### 1.2.2. All-cause mortality: time to event (HD)

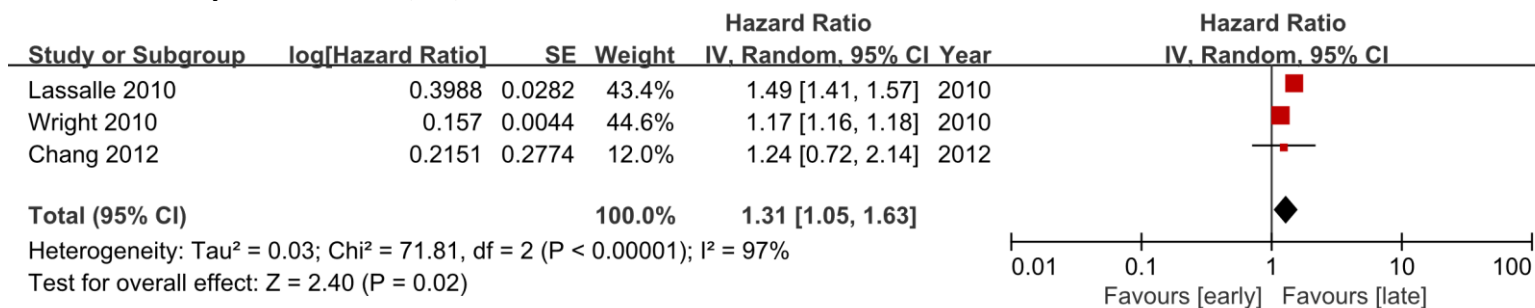

### 1.2.3. All-cause mortality: 1 mL/min/1.73m<sup>2</sup> GFR greater (HD or PD)

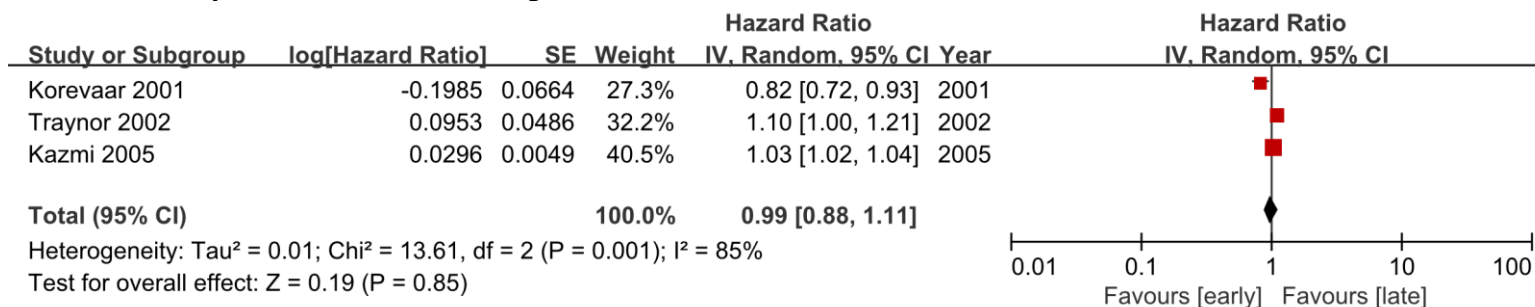

## 1.3. Cost effectiveness: use of resource by group over duration of trial

### 1.3.1. Hospitalization: average days

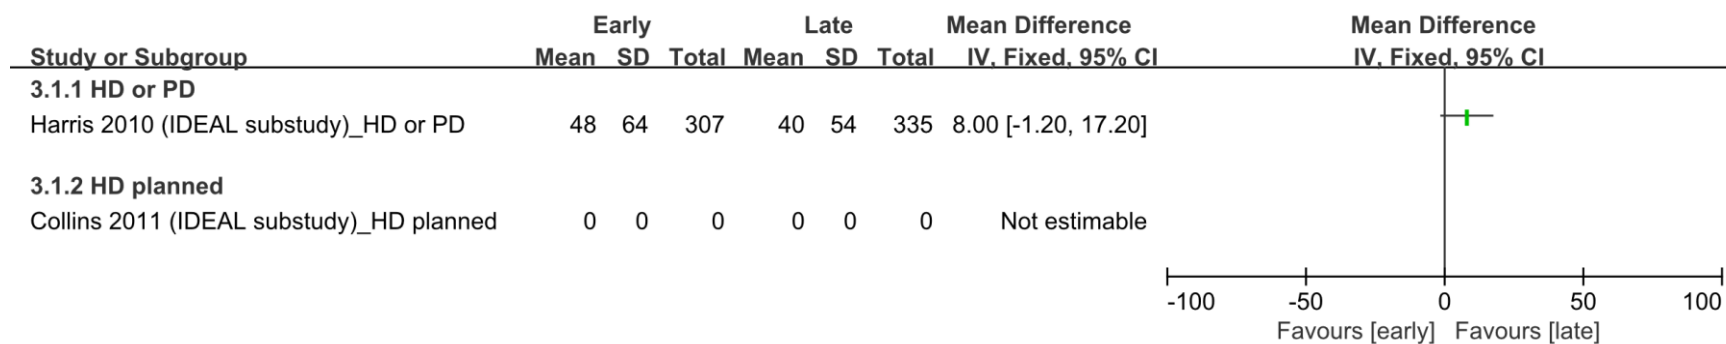

1.3.2. Hospitalization: average contacts

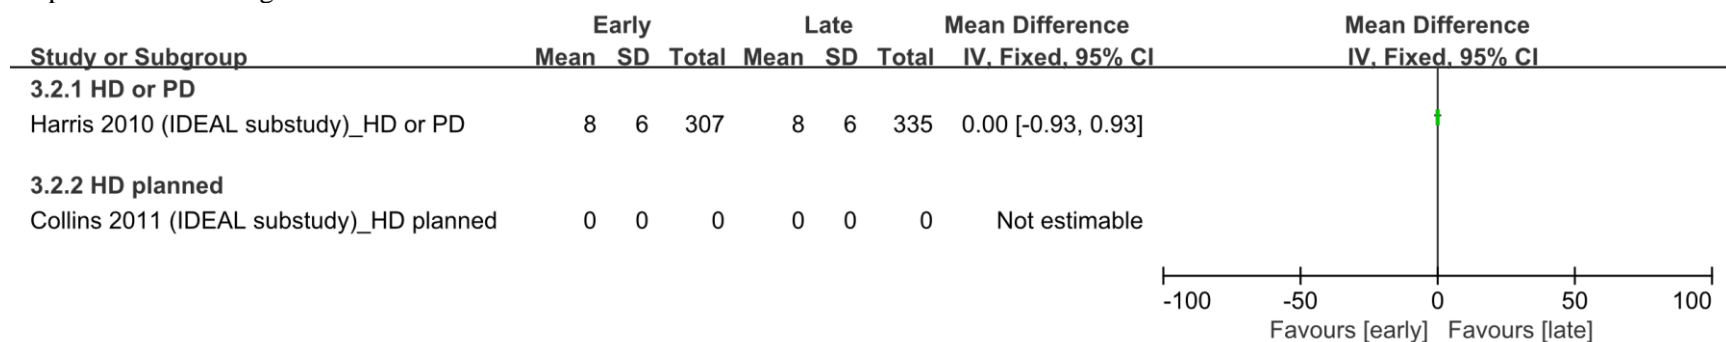

1.3.3. Non-admitted hospital visits

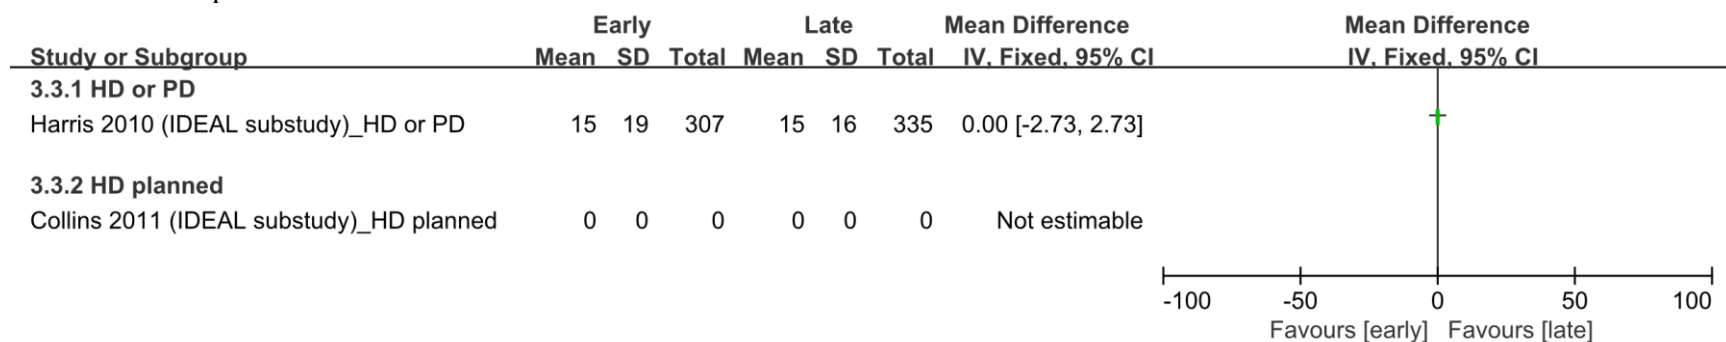

1.3.4. Visit to health care professional

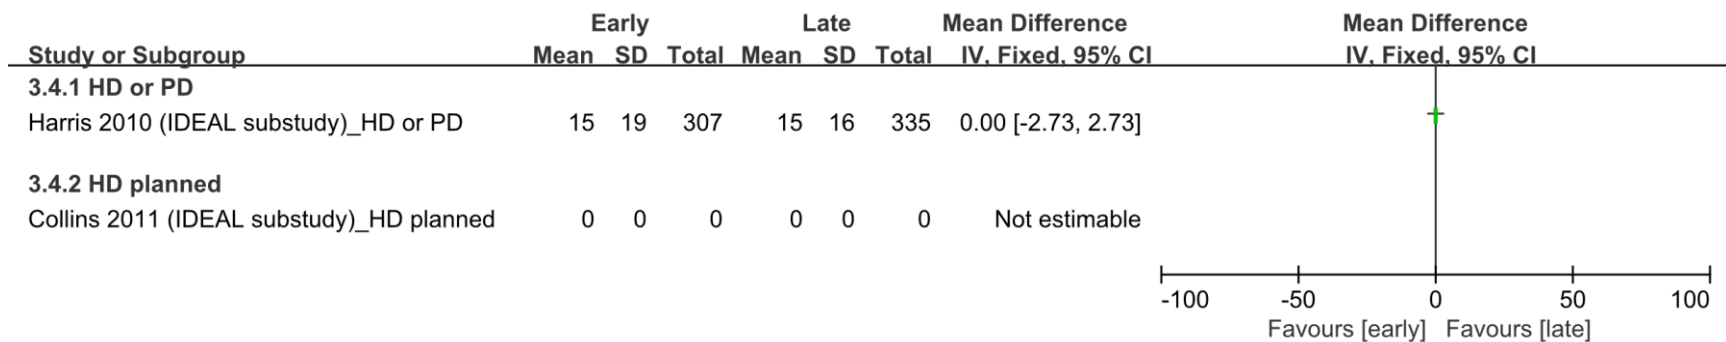

## 1.4. Adverse events

### 1.4.1. Composite cardiovascular events

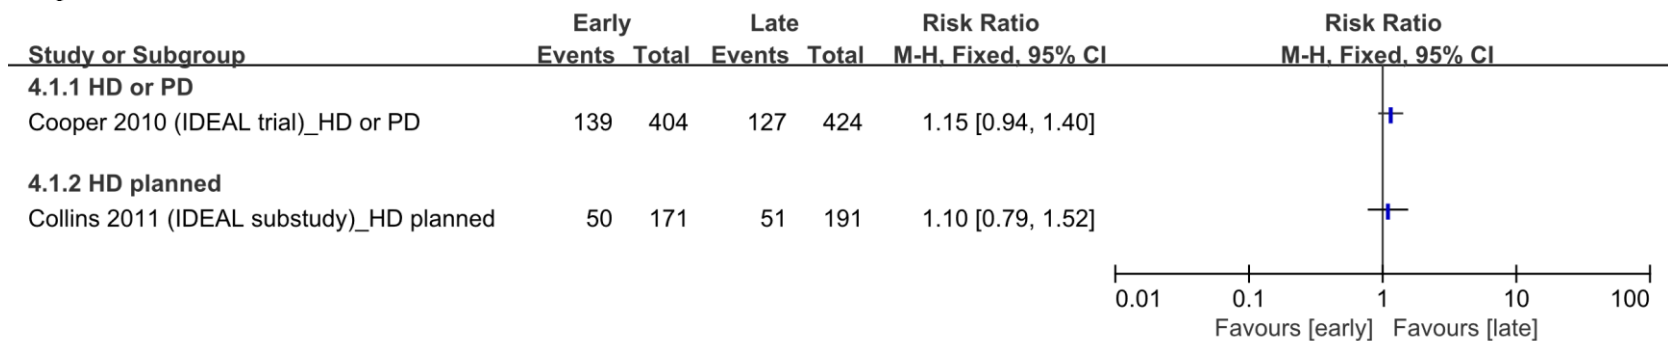

### 1.4.2. Composite infectious events (death or hospitalization from infection)

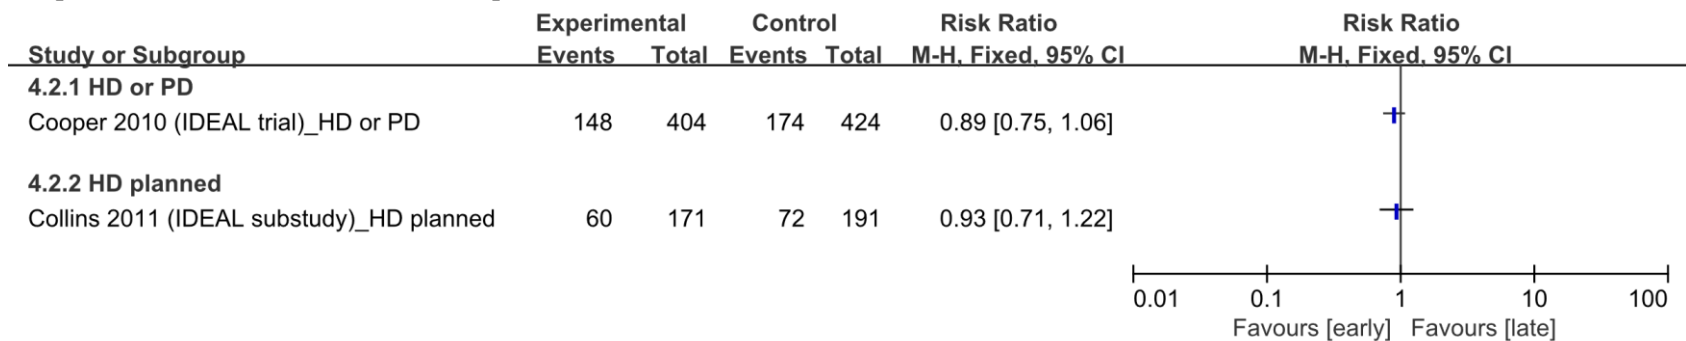

### 1.4.3. Complications of dialysis (need for access revision)

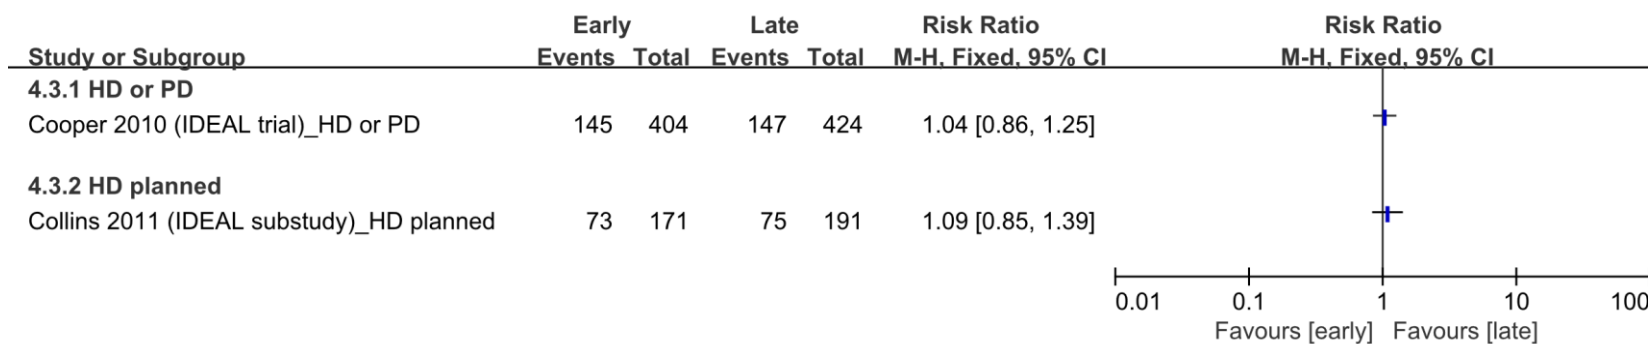

1.4.4. Complication of dialysis (access site infection)

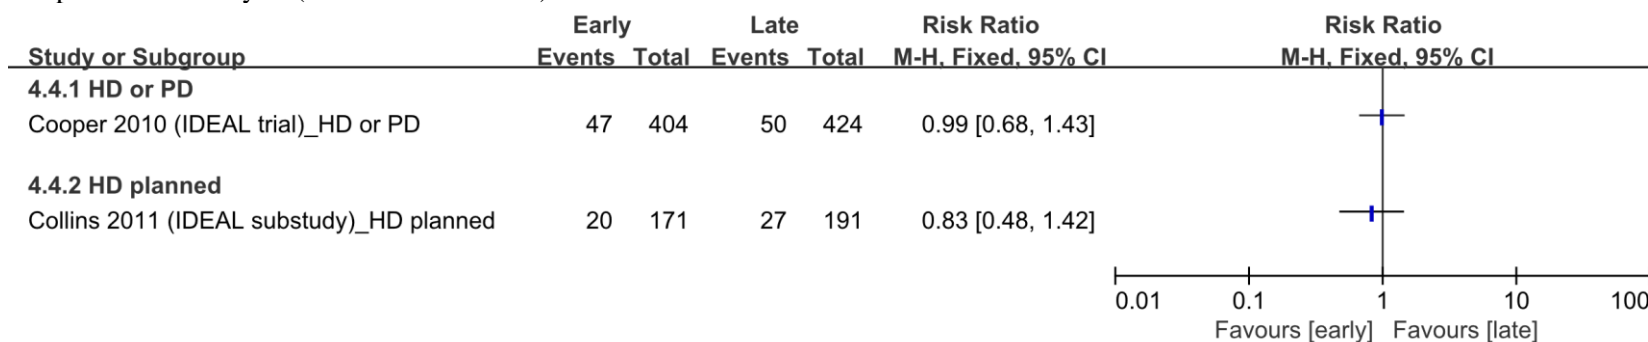

1.4.5. Complication of dialysis (serious fluid or electrolytes disorder)

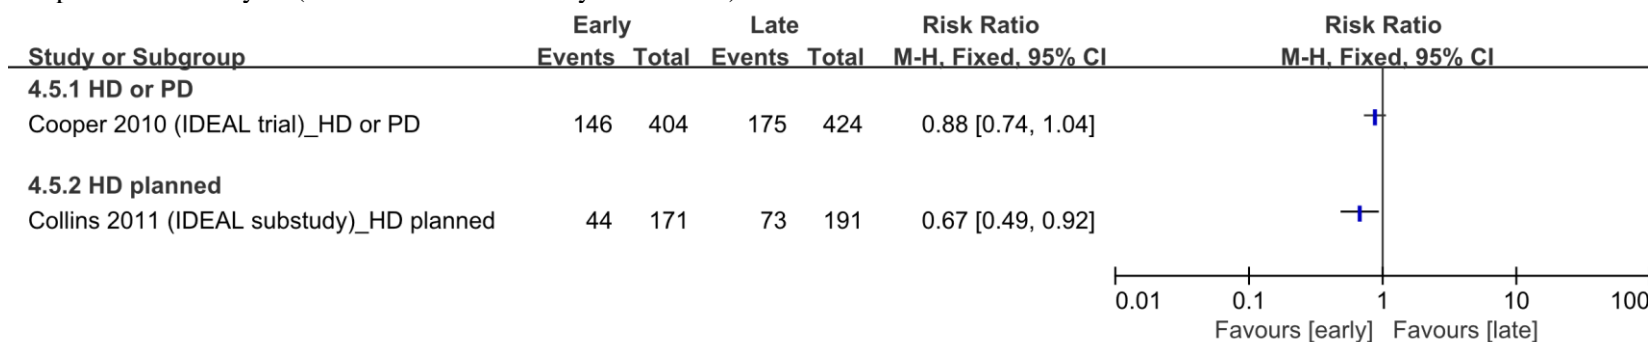

1.4.6. Complication of dialysis (placement of temporary dialysis catheter)

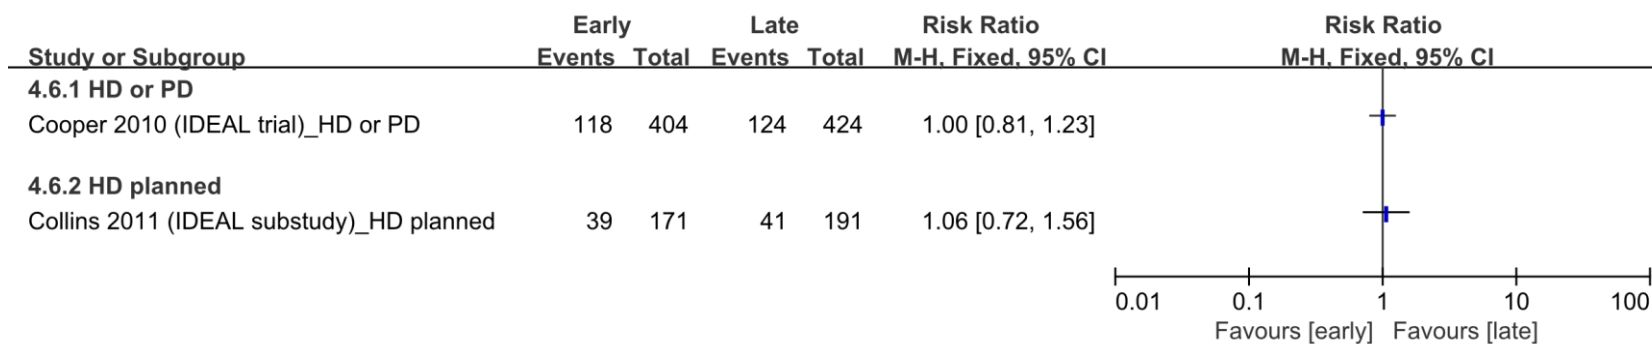

## 1.5. Echocardiographic data

1.5.1. Echocardiographic endpoint: Left ventricular ejection fraction (%)

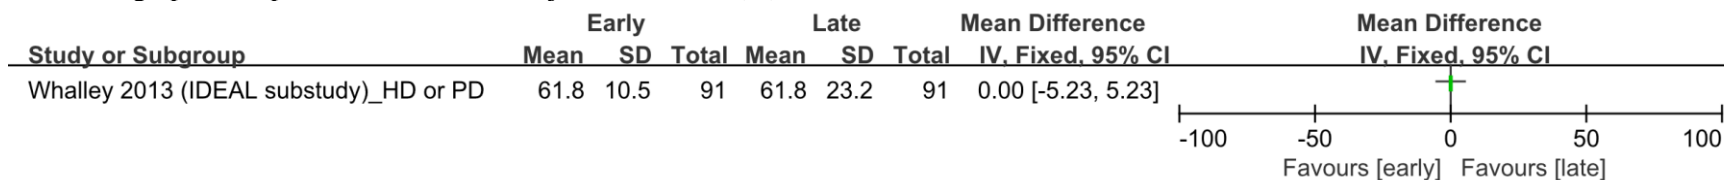

1.5.2. Echocardiographic endpoint: Left ventricular mass index (g/m<sup>2</sup>)

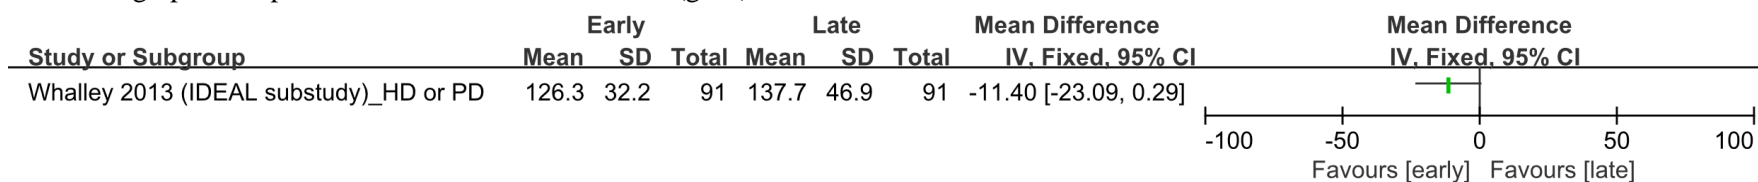

1.5.3. Echocardiographic endpoint: Left atrial volume index (mL/m<sup>2</sup>)

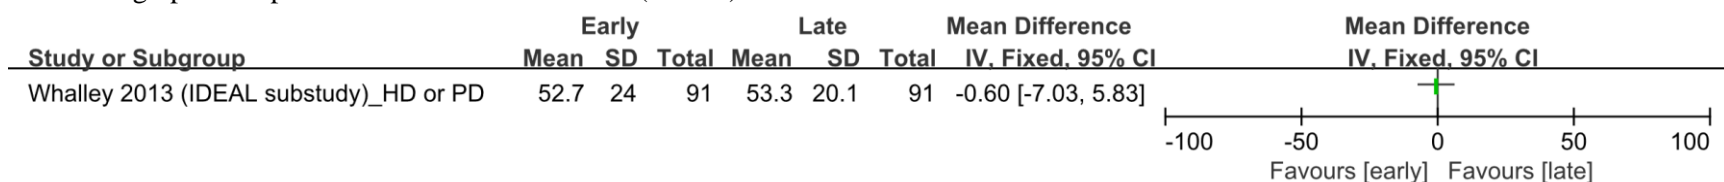

## Key question 1.2.

Not applicable

## Key question 2.1.

1.1. All-cause mortality of <4 hours vs ≥4 hours dialysis time per sessions: RCT

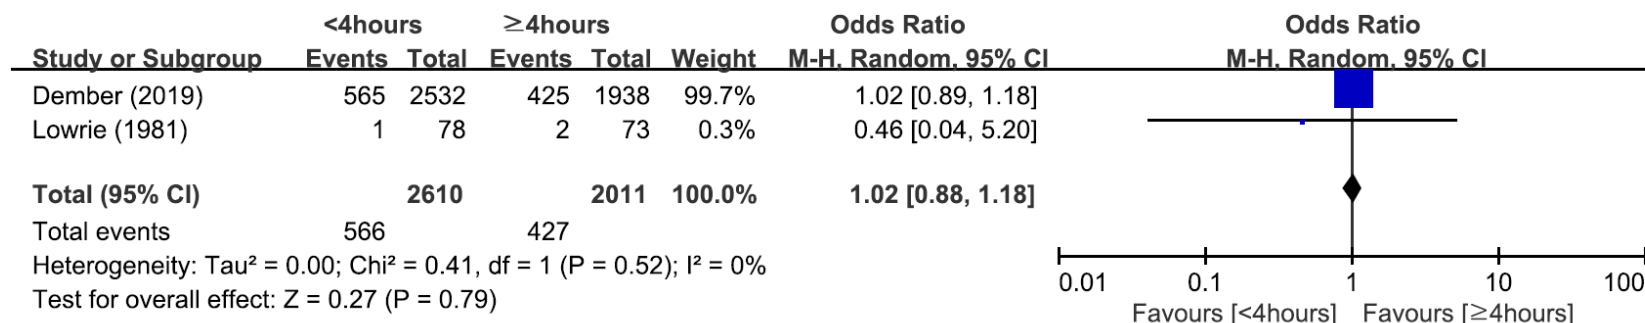

1.2. Hospitalization of <4 hours vs ≥4 hours dialysis time per sessions: RCT

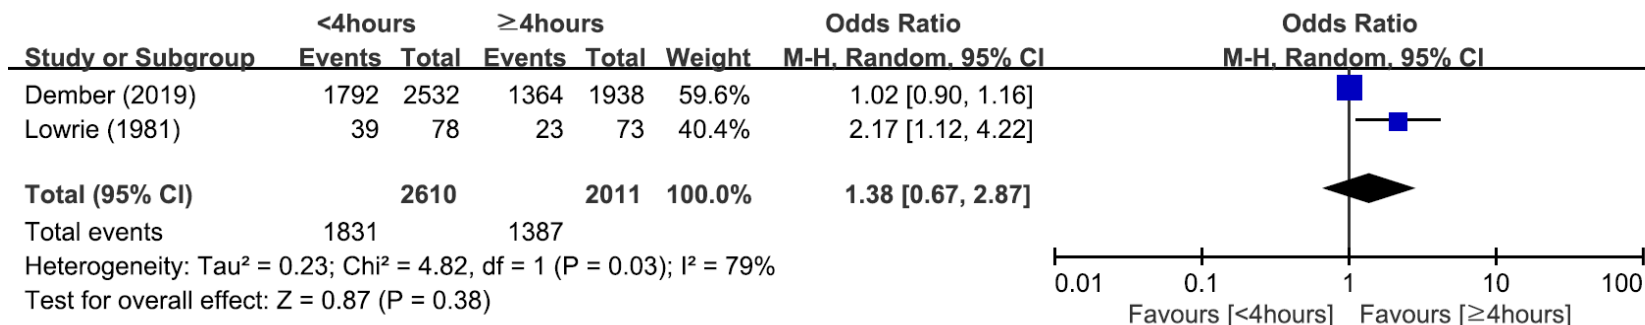

1.3. All-cause mortality of <4 hours vs ≥4 hours dialysis time per sessions: non-RCT

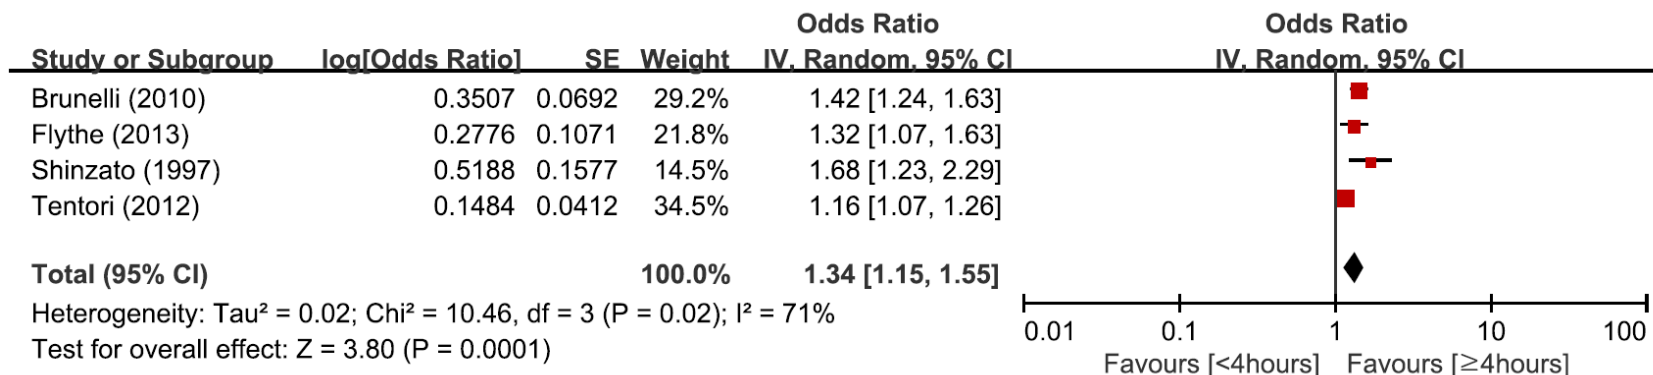

1.4. All-cause mortality of 2/week vs 3/week dialysis session: non-RCT

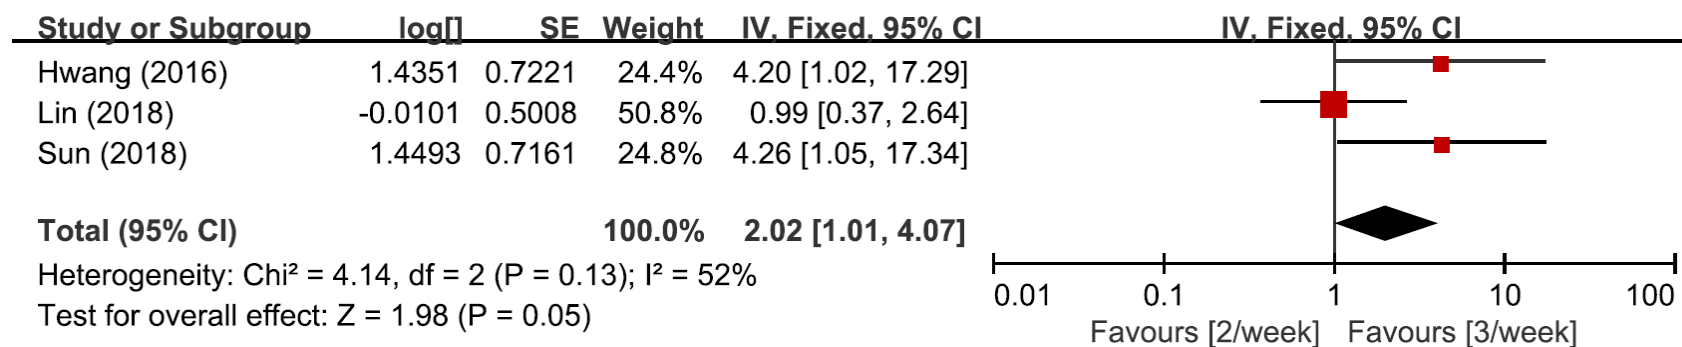

**Key question 2.2.**

Not applicable

**Key question 3.1.**



1.1. High vs. low flux hemodialysis: meta-analysis result on all-cause mortality

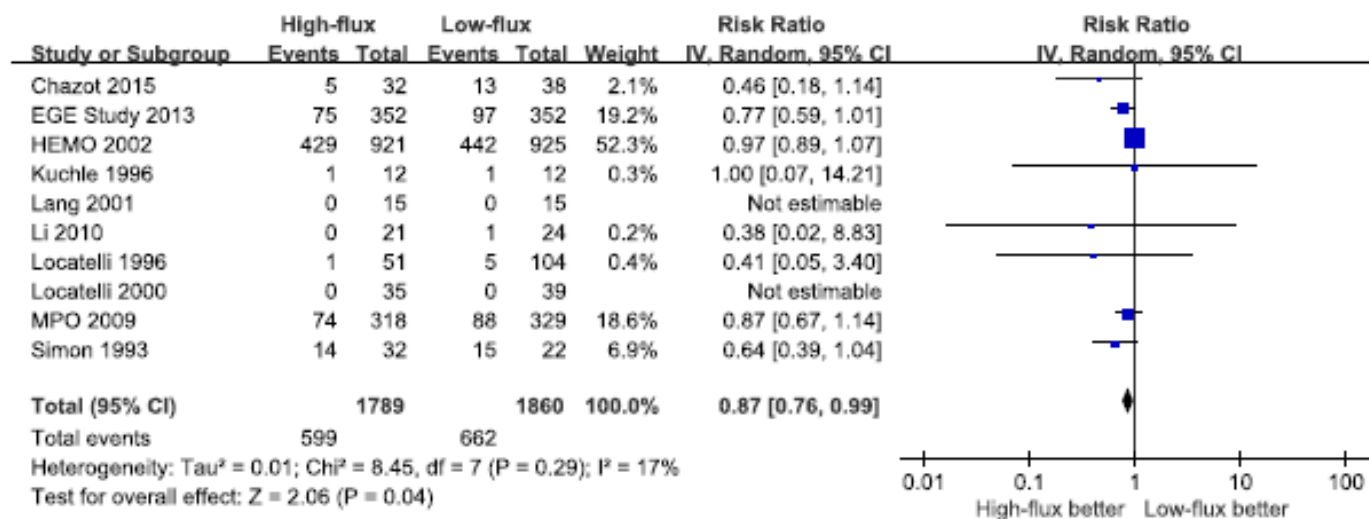

1.2. High vs. low flux hemodialysis: meta-analysis result on cardiovascular death

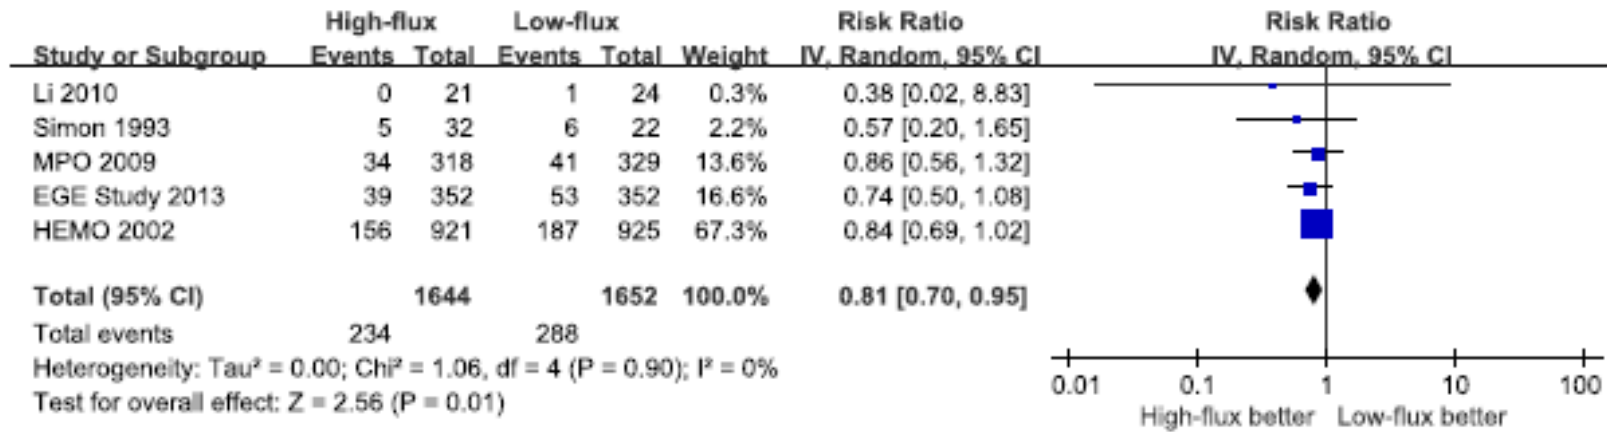

1.3. High vs. low flux hemodialysis: meta-analysis result on hospitalization

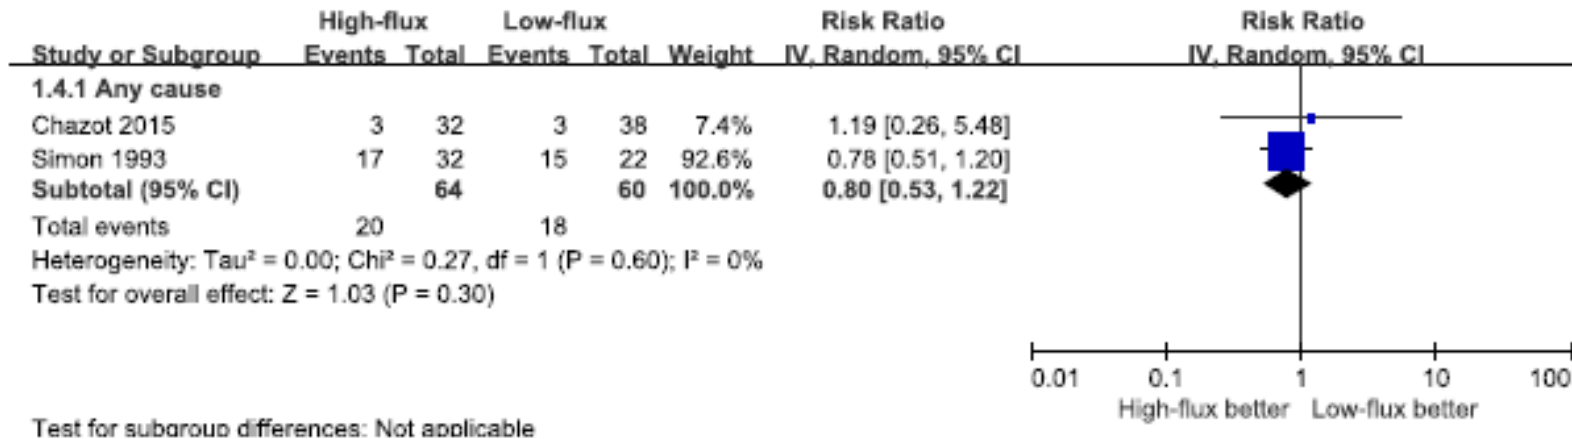

1.4. High vs. low flux hemodialysis: meta-analysis result on serum  $\beta_2$ -microglobulin concentration

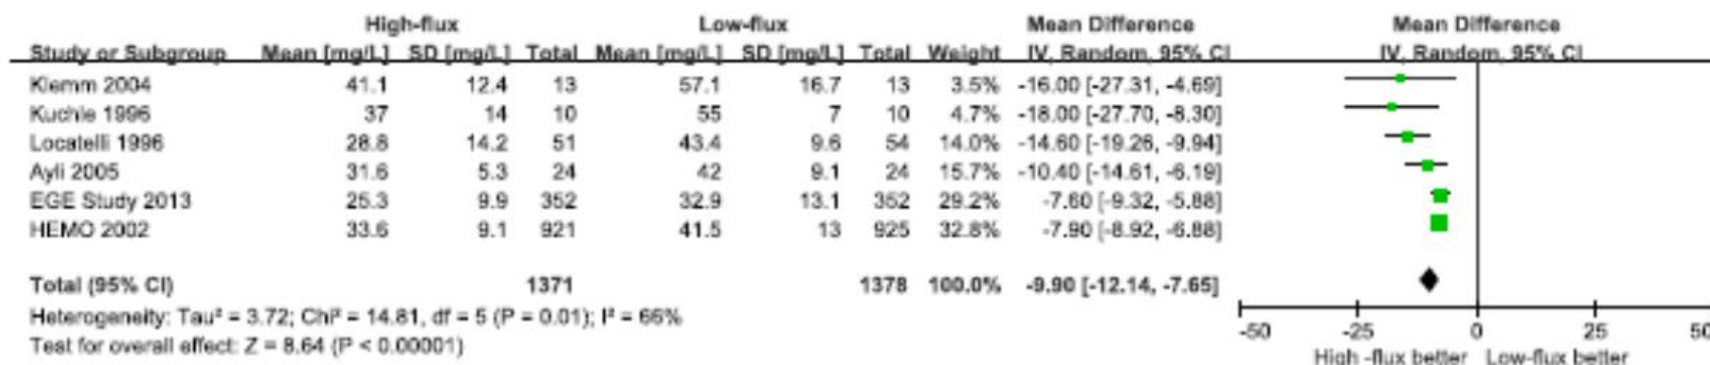

1.5. High vs. low flux hemodialysis: meta-analysis result on eKt/V

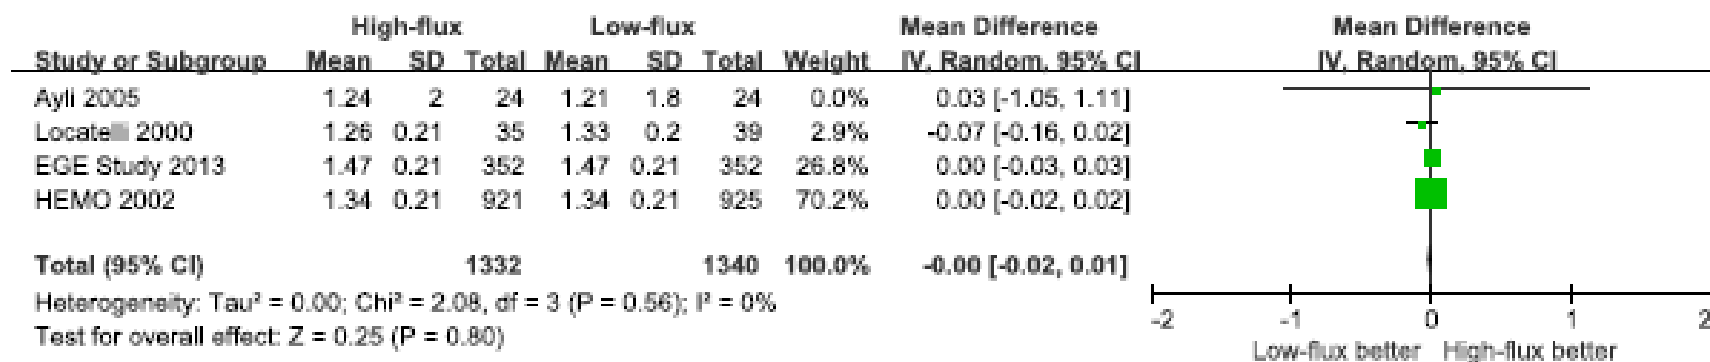

Key question 3.2.

1.1. Impact of OL-HDF on participants with end-stage kidney disease on all-cause mortality.

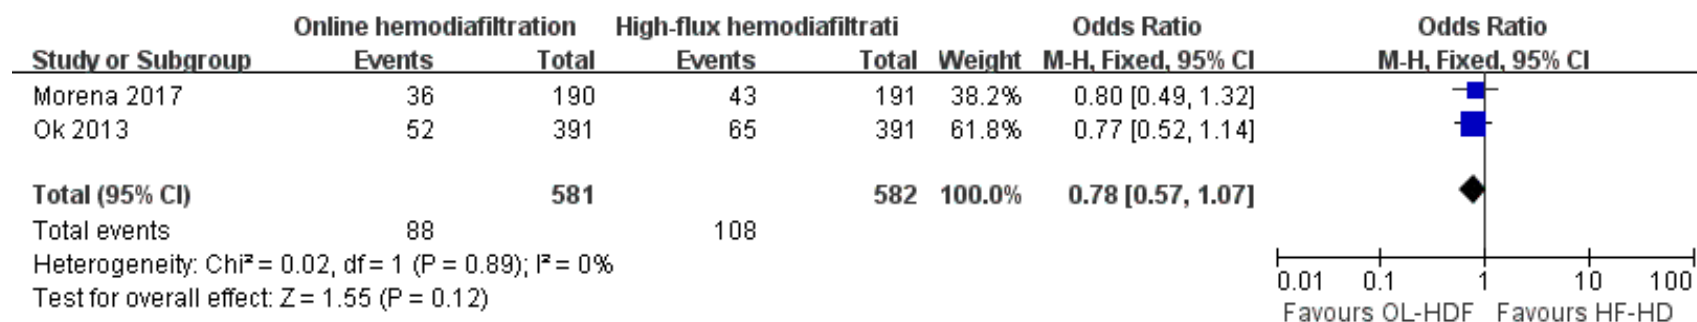

1.2. Impact of OL-HDF on participants with end-stage kidney disease on all-cause hospitalization.

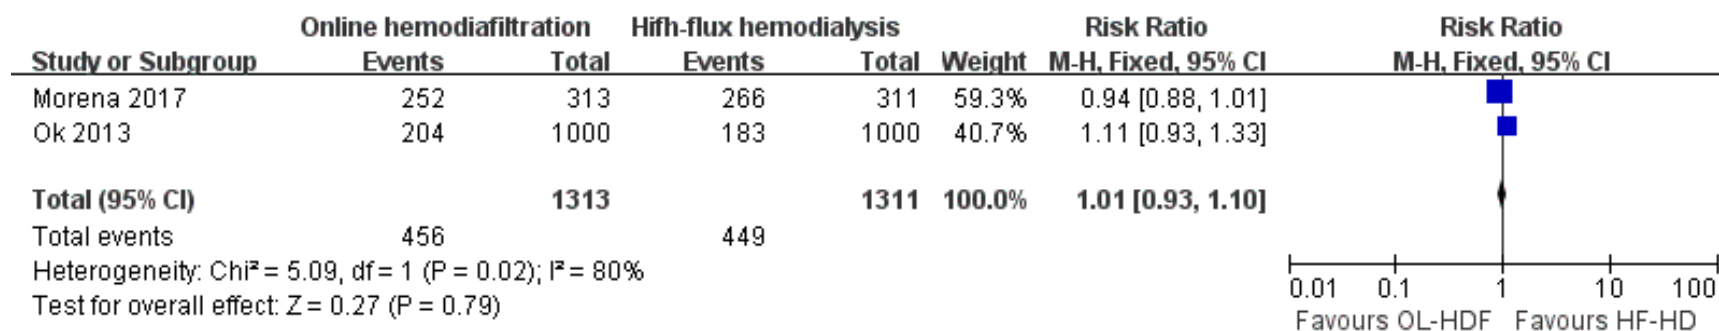

**Key question 4.1.**

| Study or Subgroup     | LMWH   |            | UFH    |            | Weight        | Risk Ratio               | Year |
|-----------------------|--------|------------|--------|------------|---------------|--------------------------|------|
|                       | Events | Total      | Events | Total      |               | IV, Random, 95% CI       |      |
| Schrader 1988         | 0      | 35         | 0      | 35         |               | Not estimable            | 1988 |
| Bambauer 1990         | 3      | 27         | 6      | 27         | 24.3%         | 0.50 [0.14, 1.80]        | 1990 |
| Nurmohamed 1991       | 3      | 35         | 0      | 35         | 10.6%         | 7.00 [0.37, 130.69]      | 1991 |
| Saltissi 1999         | 12     | 36         | 6      | 36         | 29.2%         | 2.00 [0.84, 4.75]        | 1999 |
| Stefoni 2002          | 0      | 54         | 7      | 54         | 11.0%         | 0.07 [0.00, 1.14]        | 2002 |
| Lord 2002             | 3      | 32         | 8      | 32         | 24.9%         | 0.38 [0.11, 1.29]        | 2002 |
| <b>Total (95% CI)</b> |        | <b>219</b> |        | <b>219</b> | <b>100.0%</b> | <b>0.74 [0.24, 2.31]</b> |      |

Total (95% CI)

Total events

Heterogeneity: Tau<sup>2</sup> = 0.97; Chi<sup>2</sup> = 11.14, df = 4 (P = 0.03); I<sup>2</sup> = 64%

Test for overall effect: Z = 0.52 (P = 0.60)

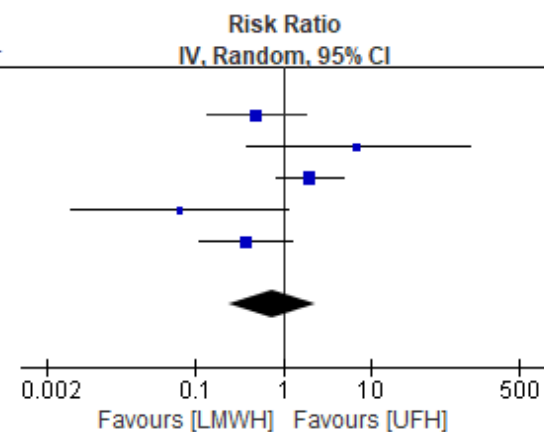

### 1.1. Meta-analysis result for bleeding

### 1.2. Meta-analysis result for hemodialysis circuit thrombosis

| Study or Subgroup     | LMWH   |             | UFH    |             | Weight        | Risk Ratio               | Year |
|-----------------------|--------|-------------|--------|-------------|---------------|--------------------------|------|
|                       | Events | Total       | Events | Total       |               | IV, Random, 95% CI       |      |
| Schrader 1988         | 80     | 5045        | 69     | 5197        | 38.1%         | 1.19 [0.87, 1.64]        | 1988 |
| Saltissi 1999         | 17     | 1111        | 35     | 1141        | 30.3%         | 0.50 [0.28, 0.89]        | 1999 |
| Lord 2002             | 32     | 378         | 21     | 382         | 31.6%         | 1.54 [0.90, 2.62]        | 2002 |
| <b>Total (95% CI)</b> |        | <b>6534</b> |        | <b>6720</b> | <b>100.0%</b> | <b>0.99 [0.56, 1.77]</b> |      |

Total (95% CI)

Total events

Heterogeneity: Tau<sup>2</sup> = 0.20; Chi<sup>2</sup> = 9.06, df = 2 (P = 0.01); I<sup>2</sup> = 78%

Test for overall effect: Z = 0.02 (P = 0.98)

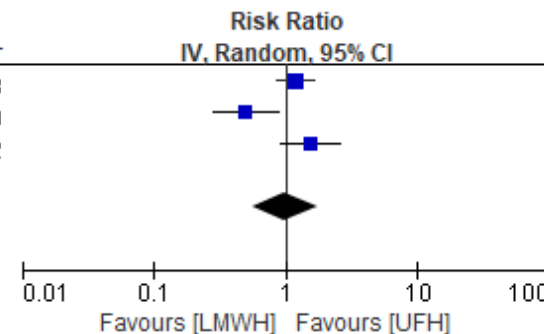

## Key question 4.2.

Not applicable

## Key question 5.1.

Not applicable

## Key question 5.2.

### 1.1. Interdialytic weight gain

1.1.1. Low dialysate [Na<sup>+</sup>] (<138 mEq/L) vs. conventional dialysate [Na<sup>+</sup>] (138 -140 mEq/L): RCT

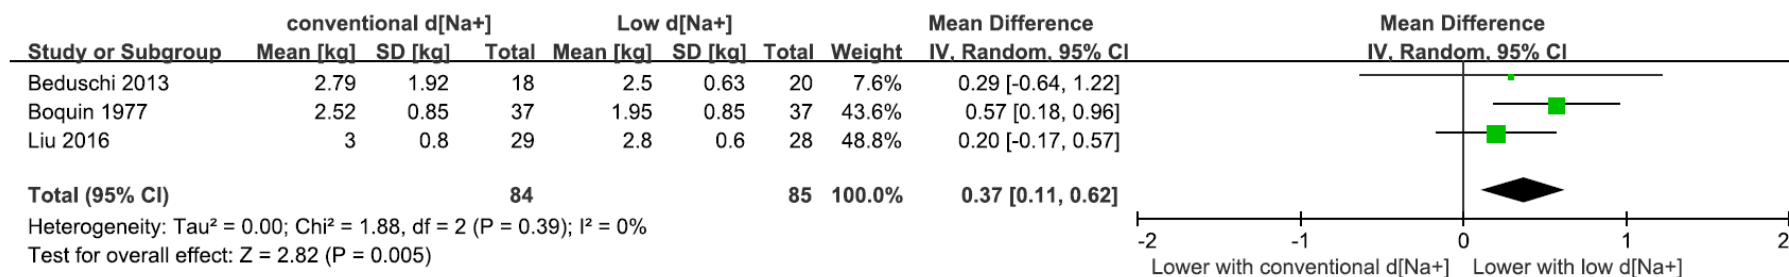

1.1.2. Low dialysate [Na<sup>+</sup>] (<138 mEq/L) vs. conventional dialysate [Na<sup>+</sup>] (138 -140 mEq/L): non-RCT

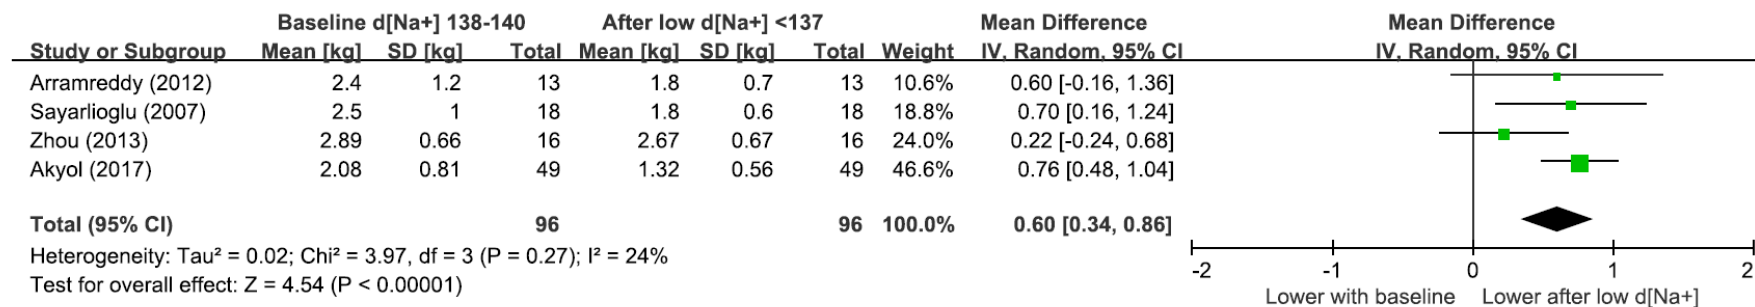

### 1.2. Predialysis BP

1.2.1. Low dialysate [Na<sup>+</sup>] (<138 mEq/L) vs. conventional dialysate [Na<sup>+</sup>] (138 -140 mEq/L): RCT

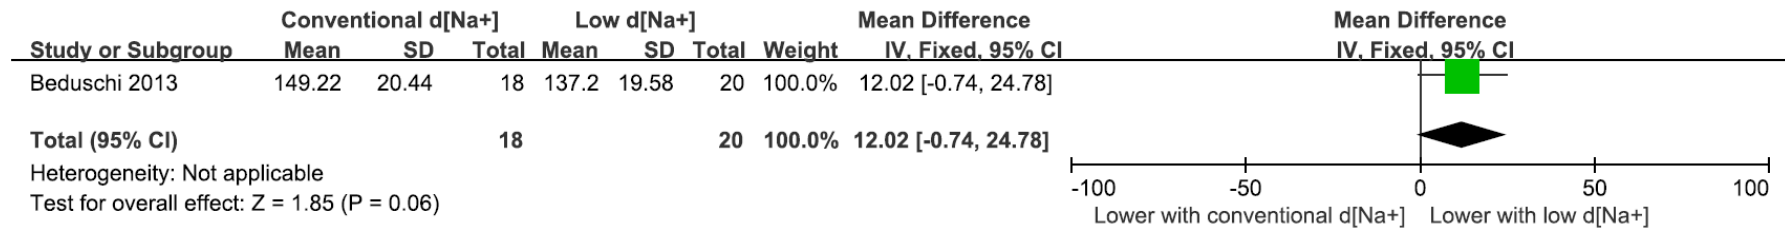

### 1.2.2. Low dialysate [Na<sup>+</sup>] (<138 mEq/L) vs. conventional dialysate [Na<sup>+</sup>] (138 -140 mEq/L): non-RCT

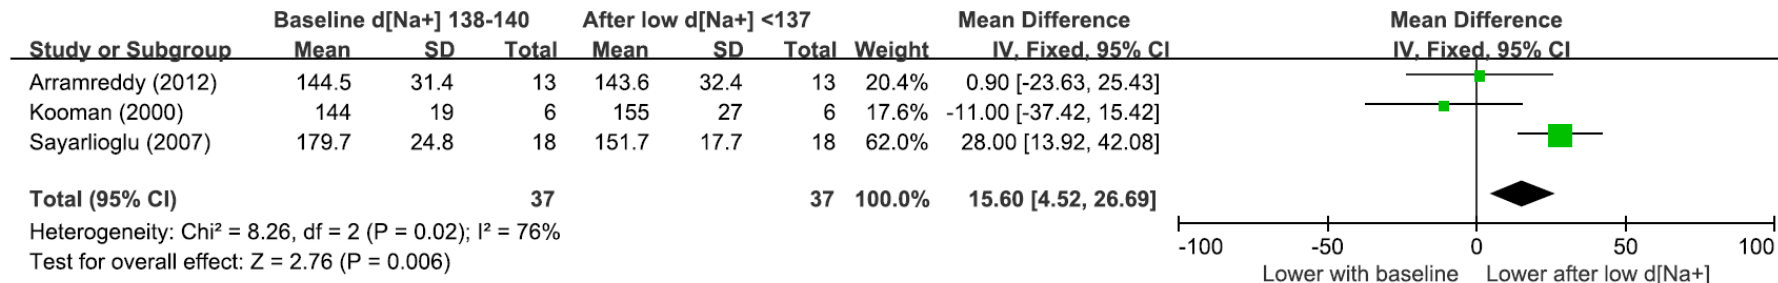

### 1.3. Antihypertensive medication: Low dialysate [Na<sup>+</sup>] (<138 mEq/L) vs. conventional dialysate [Na<sup>+</sup>] (138 -140 mEq/L): RCT

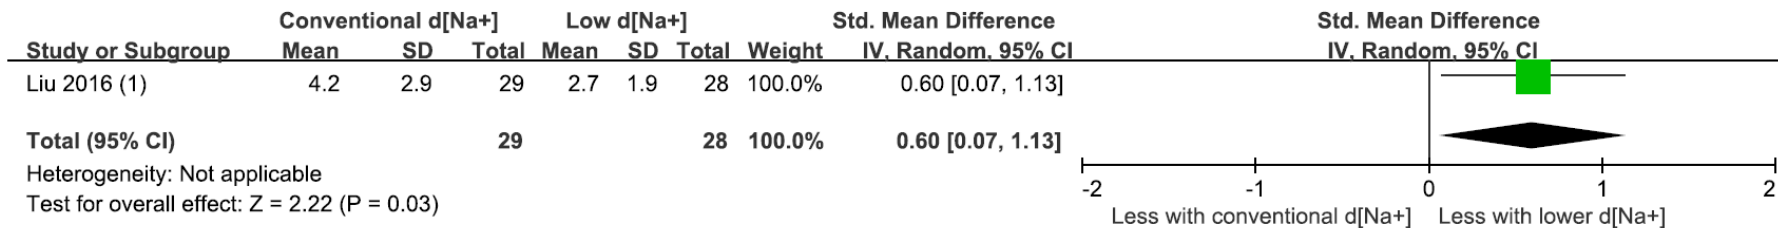

#### Footnotes

(1) Aggregated equivalent dose units

### 1.4. Echocardiographic parameter: Low dialysate [Na<sup>+</sup>] (<138 mEq/L) vs. conventional dialysate [Na<sup>+</sup>] (138 -140 mEq/L): non-RCT

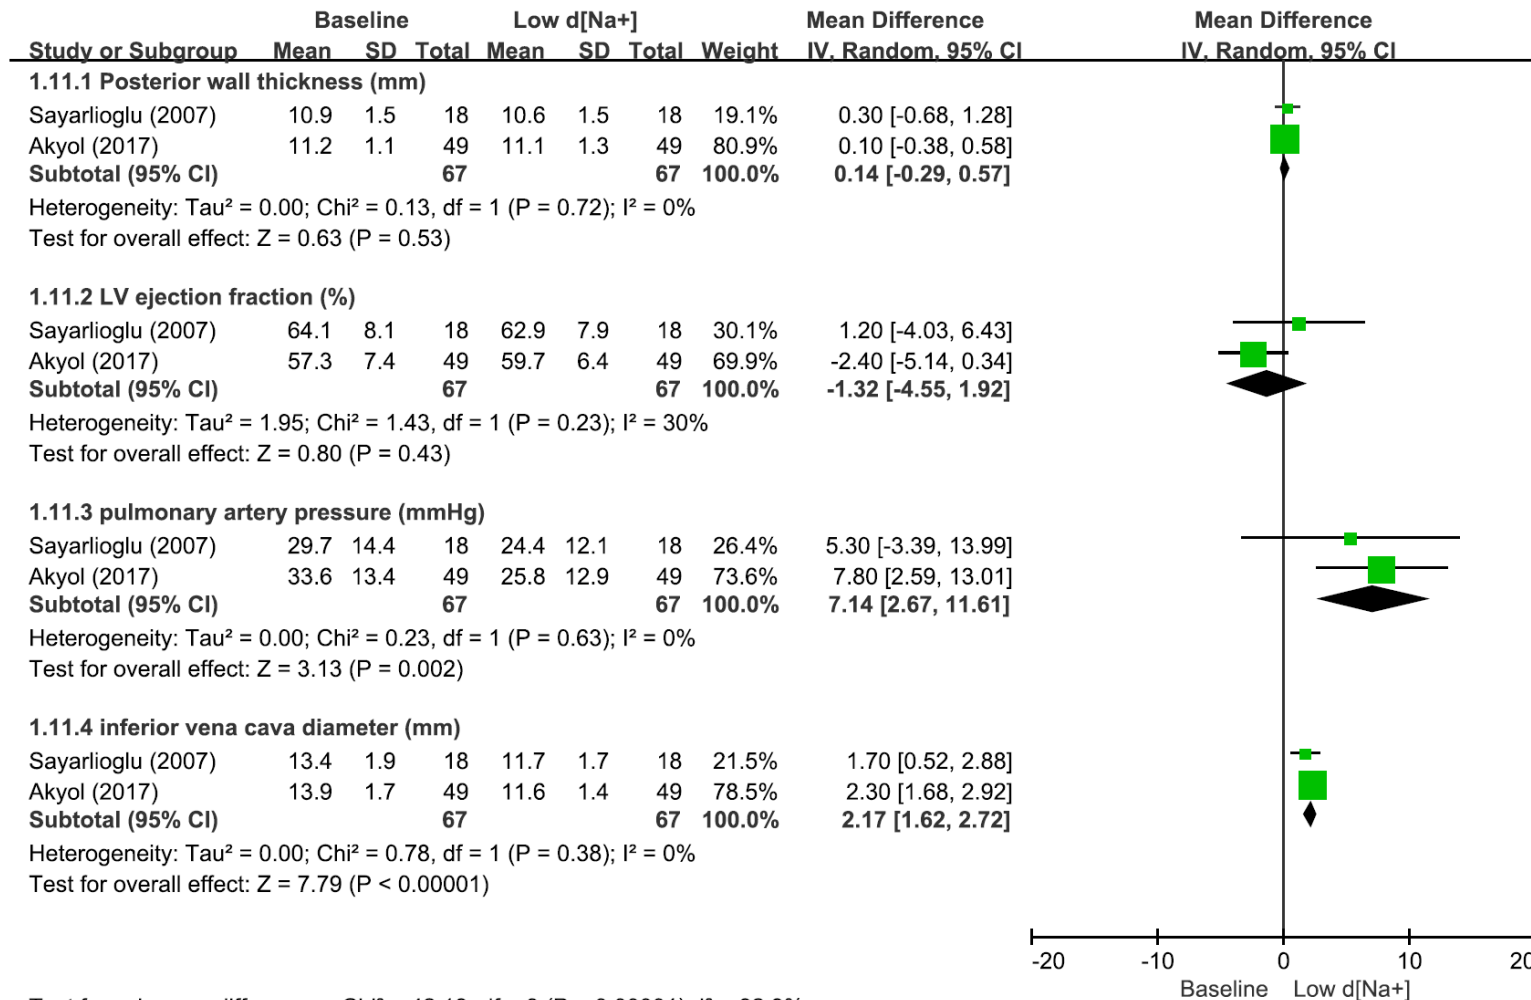

Test for subarou differences: Chi<sup>2</sup> = 42.19, df = 3 (P < 0.00001). I<sup>2</sup> = 92.9%

## 1.5. Serum Na

1.5.1. Low dialysate [Na<sup>+</sup>] (<138 mEq/L) vs. conventional dialysate [Na<sup>+</sup>] (138 -140 mEq/L): RCT



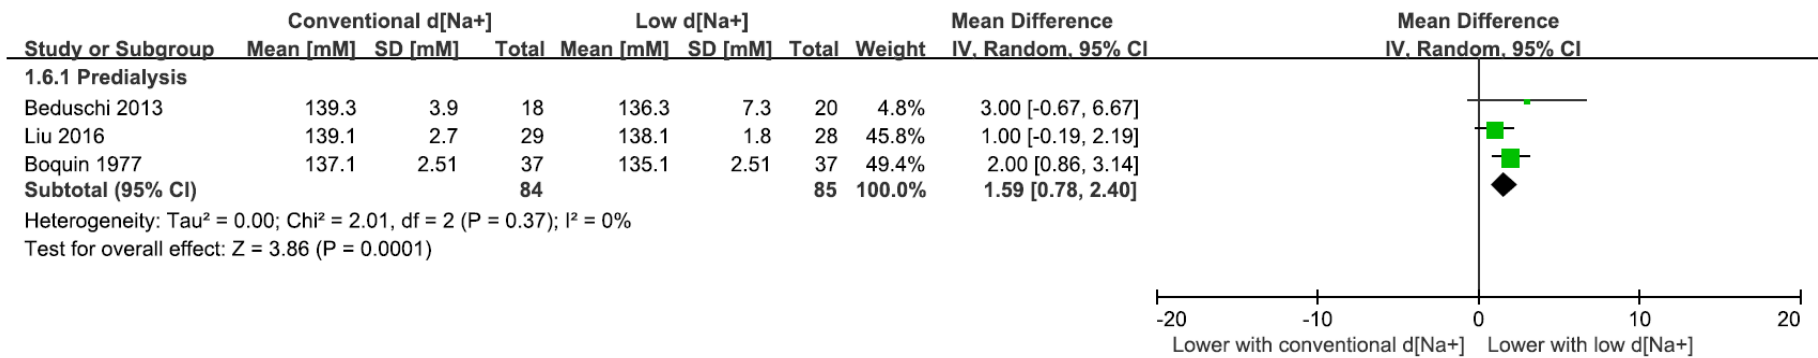

1.5.2. Low dialysate [Na<sup>+</sup>] (<138 mEq/L) vs. conventional dialysate [Na<sup>+</sup>] (138 -140 mEq/L): non-RCT

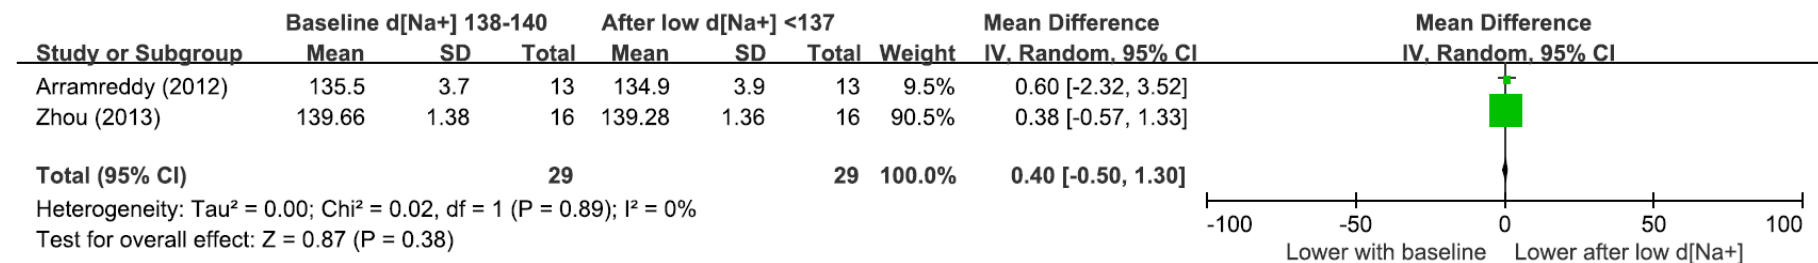

1.6. Intradialytic hypotension: Low dialysate [Na<sup>+</sup>] (< 38 mEq/L) vs. conventional dialysate [Na<sup>+</sup>] (138 -140 mEq/L): RCT

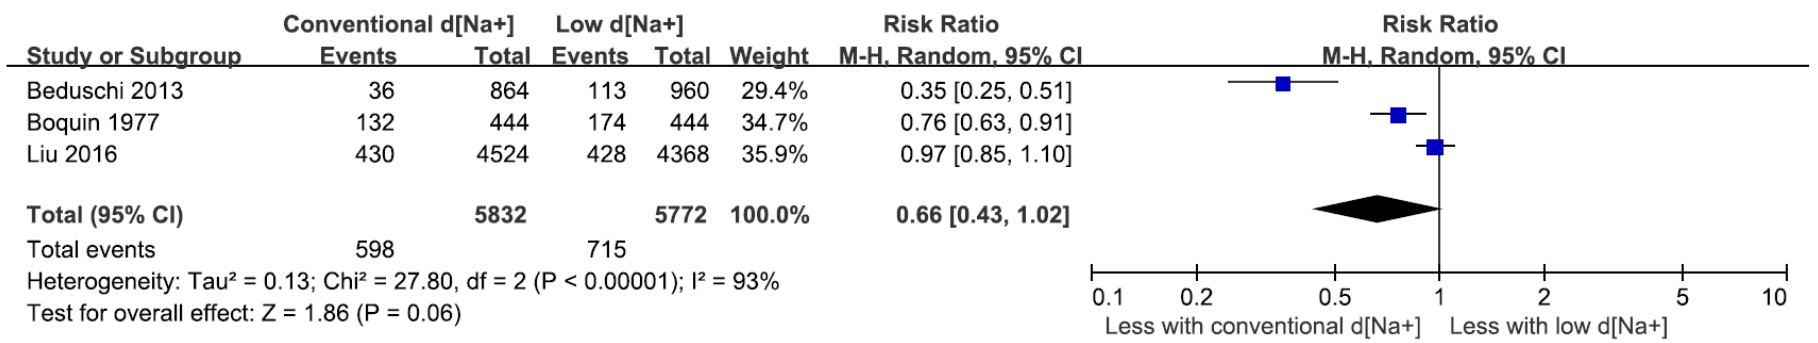

### Key question 6.1.

Not applicable

### Key question 6.2.

Not applicable

### Key question 7.1.

Not applicable

### Key question 8.1.

1.1. Meta-analysis of dialysis treatment compared with supportive care for mortality in elderly ESRD patients.

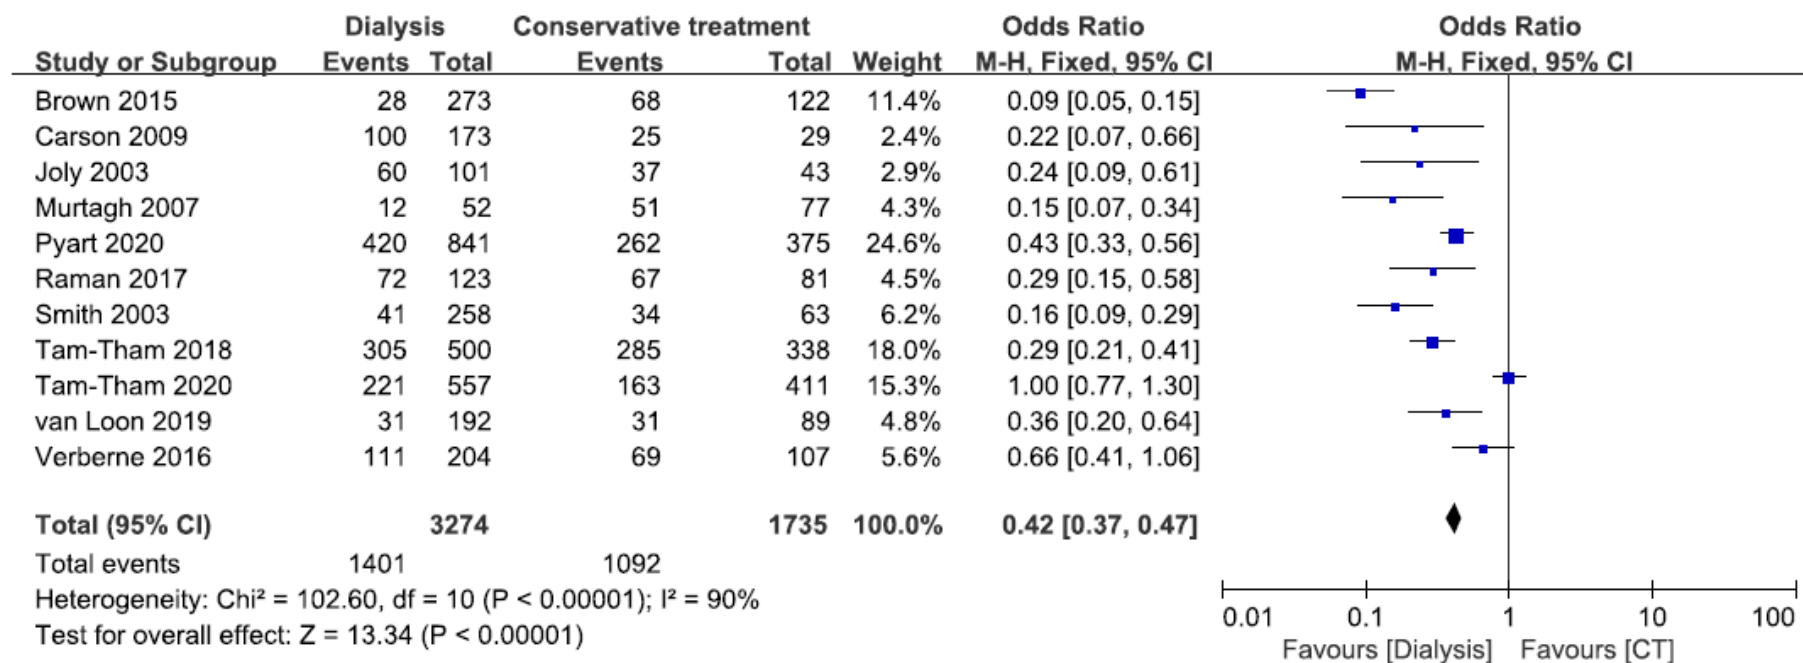



1.2. Subgroup meta-analysis of dialysis treatments for mortality in prospective observational studies.

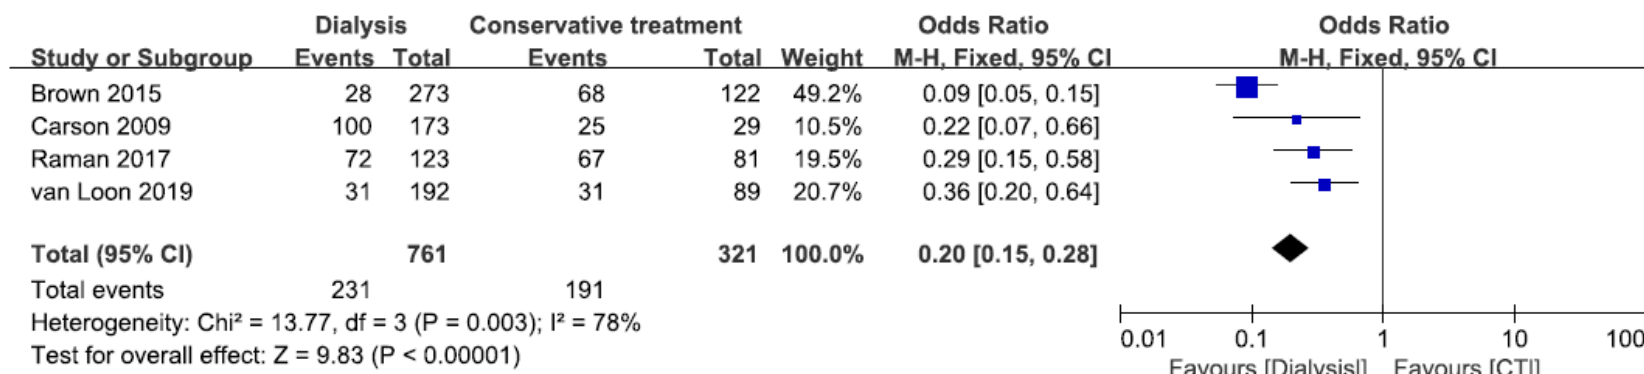

1.3. Subgroup meta-analysis of dialysis treatments for mortality in retrospective studies only.

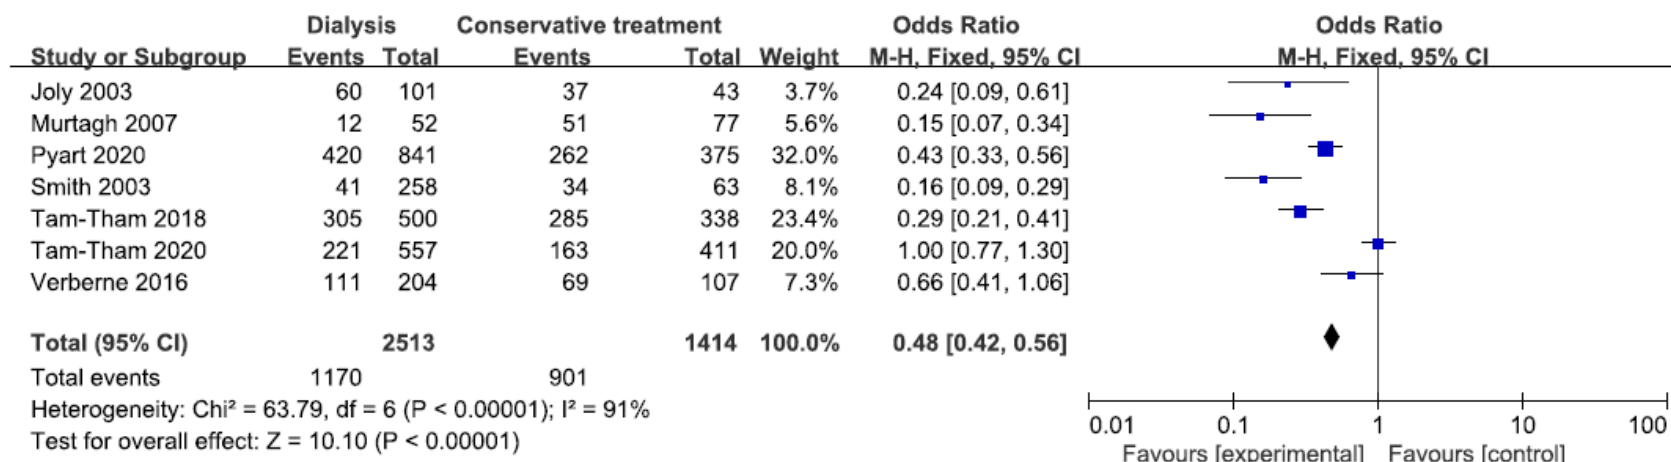

**Key question 8.2.**

Not applicable
